# Supplementary material for: Use of soybean as an alternative protein source for welfare-orientated production of American alligators (Alligator mississippiensis)
Source: PeerJ. 2023 Oct 26;11:e16321. doi: 10.7717/peerj.16321 (PMC10613434; doi:10.7717/peerj.16321)
Supplement: Supplemental Information 2 — Raw values for morphometrics, behavior and final hide quality. [file peerj-11-16321-s002.xlsx]

## Sheet: Morphs
START BW	START WEIGHT	START WEIGHT kg	END BW	END WEIGHT	END WEIGHT kg	Weight change lbs	BW Change	Weight change	Feed
28	NA	NA	40	62.5	28.3495	NA	12	NA	ABP
34	33.2	15.0593	40	86.8	39.3718	53.6	6	24.3126	ABP
37	46.6	21.1374	47	98	44.4521	51.4	10	23.3146	ABP
34	38.2	17.3272	45	89.4	40.5512	51.2	11	23.2239	ABP
35	42	19.0509	45	93.2	42.2748	51.2	10	23.2239	ABP
35	34.6	15.6943	46	84.9	38.51	50.3	11	22.8157	ABP
36	42.2	19.1416	46	92.2	41.8212	50	10	22.6796	SBP
36	42	19.0509	46	91.5	41.5037	49.5	10	22.4528	ABP
28	NA	NA	35	48.8	22.1353	NA	7	NA	ABP
36	37.8	17.1458	46	86.6	39.2811	48.8	10	22.1353	ABP
37	33.6	15.2407	46	82	37.1946	48.4	9	21.9539	SBP
35	34.5	15.6489	44	82.5	37.4214	48	9	21.7724	ABP
33	35.8	16.2386	42	83.7	37.9657	47.9	9	21.7271	SBP
37	38.2	17.3272	45	86	39.0089	47.8	8	21.6817	SBP
33	33.4	15.15	43	80	36.2874	46.6	10	21.1374	ABP
26	NA	NA	35	46.6	21.1374	NA	9	NA	SBP
31	26.4	11.9748	44	72.9	33.0669	46.5	13	21.092	SBP
33	31	14.0614	44	77	34.9266	46	11	20.8652	ABP
35	42	19.0509	43	87.9	39.8708	45.9	8	20.8199	ABP
35	41.2	18.688	45	87	39.4625	45.8	10	20.7745	SBP
39	40.8	18.5066	45	86.4	39.1904	45.6	6	20.6838	SBP
33	33.2	15.0593	40	78.3	35.5163	45.1	7	20.457	ABP
34	33.2	15.0593	44	78.3	35.5163	45.1	10	20.457	SBP
33	30.2	13.6985	40	75.2	34.1101	45	7	20.4117	SBP
32	32.8	14.8778	43	77.6	35.1988	44.8	11	20.3209	ABP
38	37.8	17.1458	44	82.5	37.4214	44.7	6	20.2756	ABP
36	33.8	15.3314	44	78.5	35.607	44.7	8	20.2756	ABP
33	33.5	15.1953	42	78.1	35.4256	44.6	9	20.2302	ABP
35	36	16.3293	44	80.3	36.4235	44.3	9	20.0941	SBP
32	32.8	14.8778	40	76.9	34.8813	44.1	8	20.0034	ABP
36	36.4	16.5108	40	80.5	36.5142	44.1	4	20.0034	SBP
33	33.4	15.15	40	77.4	35.108	44	7	19.9581	SBP
32	32.8	14.8778	41	76.7	34.7905	43.9	9	19.9127	ABP
34	37	16.7829	45	80.9	36.6956	43.9	11	19.9127	ABP
26	36.4	16.5108	44	80.3	36.4235	43.9	18	19.9127	SBP
35	36.2	16.42	43	80.1	36.3327	43.9	8	19.9127	SBP
32	21.4	9.70688	40	65.2	29.5742	43.8	8	19.8673	SBP
33	33.2	15.0593	45	77	34.9266	43.8	12	19.8673	ABP
31	NA	NA	34	43.4	19.6859	NA	3	NA	SBP
35	29.8	13.5171	40	72.8	33.0215	43	5	19.5045	ABP
35	31.2	14.1521	41	74.1	33.6112	42.9	6	19.4591	SBP
32	31.8	14.4242	40	74.4	33.7473	42.6	8	19.323	ABP
35	31.8	14.4242	41	74.4	33.7473	42.6	6	19.323	ABP
31	27.8	12.6099	41	70.4	31.9329	42.6	10	19.323	ABP
31	30.6	13.8799	42	73.2	33.203	42.6	11	19.323	SBP
39	47.8	21.6817	45	90.1	40.8687	42.3	6	19.187	ABP
31	25.6	11.612	43	67.8	30.7536	42.2	12	19.1416	ABP
36	34.4	15.6036	42	76.6	34.7452	42.2	6	19.1416	SBP
33	29.4	13.3356	41	71.5	32.4319	42.1	8	19.0962	SBP
36	37	16.7829	43	78.9	35.7884	41.9	7	19.0055	SBP
33	37.4	16.9644	40	79.3	35.9699	41.9	7	19.0055	ABP
32	32.4	14.6964	42	74.3	33.7019	41.9	10	19.0055	SBP
34	36.4	16.5108	42	78.2	35.4709	41.8	8	18.9602	ABP
36	36	16.3293	42	77.6	35.1988	41.6	6	18.8694	SBP
36	41.4	18.7787	45	82.9	37.6028	41.5	9	18.8241	SBP
35	33.8	15.3314	42	74.9	33.9741	41.1	7	18.6426	SBP
32	31	14.0614	43	72.1	32.704	41.1	11	18.6426	ABP
29	23.6	10.7048	39	64.5	29.2567	40.9	10	18.5519	SBP
37	41.8	18.9602	42	82.6	37.4667	40.8	5	18.5066	SBP
34	31.2	14.1521	42	72	32.6587	40.8	8	18.5066	ABP
35	34.4	15.6036	42	75.1	34.0648	40.7	7	18.4612	SBP
33	36.4	16.5108	40	77	34.9266	40.6	7	18.4159	ABP
34	29.4	13.3356	46	69.9	31.7061	40.5	12	18.3705	ABP
33	32	14.515	41	72.5	32.8854	40.5	8	18.3705	SBP
35	32	14.515	40	72.5	32.8854	40.5	5	18.3705	SBP
32	30.2	13.6985	40	70.7	32.069	40.5	8	18.3705	SBP
36	41.4	18.7787	44	81.8	37.1039	40.4	8	18.3251	ABP
29	24.8	11.2491	41	65.1	29.5289	40.3	12	18.2798	ABP
34	38.8	17.5994	43	79	35.8338	40.2	9	18.2344	ABP
26	NA	NA	32	40.2	18.2344	NA	6	NA	SBP
35	37.4	16.9644	42	77.6	35.1988	40.2	7	18.2344	ABP
35	35.8	16.2386	45	75.7	34.3369	39.9	10	18.0983	ABP
35	38.2	17.3272	45	78.1	35.4256	39.9	10	18.0983	SBP
33	31	14.0614	44	70.8	32.1143	39.8	11	18.053	ABP
32	20	9.07185	36	59.7	27.0795	39.7	4	18.0076	SBP
37	39.2	17.7808	44	78.9	35.7884	39.7	7	18.0076	SBP
26	20.9	9.48008	37	60.6	27.4877	39.7	11	18.0076	SBP
32	28.8	13.0635	39	68.5	31.0711	39.7	7	18.0076	ABP
30	27.8	12.6099	38	67.4	30.5721	39.6	8	17.9623	SBP
35	35.8	16.2386	41	75.2	34.1101	39.4	6	17.8715	SBP
37	29.2	13.2449	40	68.6	31.1164	39.4	3	17.8715	ABP
30	24.2	10.9769	38	63.5	28.8031	39.3	8	17.8262	SBP
35	35.6	16.1479	41	74.8	33.9287	39.2	6	17.7808	SBP
32	27.4	12.4284	39	66.5	30.1639	39.1	7	17.7355	ABP
35	33.4	15.15	42	72.4	32.8401	39	7	17.6901	SBP
32	31	14.0614	50	70	31.7515	39	18	17.6901	ABP
35	30.8	13.9706	39	69.8	31.6607	39	4	17.6901	SBP
33	32.6	14.7871	41	71.6	32.4772	39	8	17.6901	ABP
35	36.6	16.6015	40	75.5	34.2462	38.9	5	17.6447	SBP
38	43.8	19.8673	44	82.6	37.4667	38.8	6	17.5994	SBP
34	32	14.515	40	70.7	32.069	38.7	6	17.554	SBP
35	31.4	14.2428	42	70	31.7515	38.6	7	17.5087	ABP
33	36.4	16.5108	40	74.9	33.9741	38.5	7	17.4633	SBP
31	17.6	7.98323	35	56.1	25.4465	38.5	4	17.4633	SBP
30	24.8	11.2491	37	63.2	28.667	38.4	7	17.4179	ABP
31	32.6	14.7871	39	70.9	32.1597	38.3	8	17.3726	ABP
33	31.6	14.3335	41	69.9	31.7061	38.3	8	17.3726	SBP
36	35.2	15.9665	43	73.5	33.339	38.3	7	17.3726	ABP
34	35.8	16.2386	40	74.1	33.6112	38.3	6	17.3726	SBP
35	32.6	14.7871	42	70.8	32.1143	38.2	7	17.3272	SBP
33	34.6	15.6943	42	72.8	33.0215	38.2	9	17.3272	SBP
31	31.6	14.3335	39	69.7	31.6154	38.1	8	17.2819	ABP
29	30	13.6078	38	68.1	30.8896	38.1	9	17.2819	ABP
32	26.2	11.8841	39	64.3	29.166	38.1	7	17.2819	SBP
30	27	12.247	42	65	29.4835	38	12	17.2365	ABP
28	26.8	12.1563	40	64.7	29.3474	37.9	12	17.1912	SBP
35	33.6	15.2407	43	71.5	32.4319	37.9	8	17.1912	ABP
31	33.6	15.2407	39	71.4	32.3865	37.8	8	17.1458	ABP
35	35.8	16.2386	39	73.6	33.3844	37.8	4	17.1458	SBP
31	29.8	13.5171	40	67.5	30.6175	37.7	9	17.1004	ABP
32	29.8	13.5171	41	67.4	30.5721	37.6	9	17.0551	SBP
29	26.4	11.9748	38	64	29.0299	37.6	9	17.0551	ABP
30	27.6	12.5191	38	65.2	29.5742	37.6	8	17.0551	ABP
34	36.6	16.6015	41	74.2	33.6566	37.6	7	17.0551	ABP
32	31.4	14.2428	40	69	31.2979	37.6	8	17.0551	SBP
30	28.2	12.7913	40	65.8	29.8464	37.6	10	17.0551	ABP
35	36.6	16.6015	45	74.1	33.6112	37.5	10	17.0097	ABP
31	25.6	11.612	39	63	28.5763	37.4	8	16.9644	ABP
34	37.2	16.8736	41	74.6	33.838	37.4	7	16.9644	SBP
34	34.2	15.5129	40	71.6	32.4772	37.4	6	16.9644	SBP
35	36	16.3293	43	73.2	33.203	37.2	8	16.8736	SBP
34	40.4	18.3251	42	77.6	35.1988	37.2	8	16.8736	ABP
32	27.6	12.5191	40	64.8	29.3928	37.2	8	16.8736	SBP
32	33	14.9685	42	70.1	31.7968	37.1	10	16.8283	SBP
37	44.6	20.2302	46	81.5	36.9678	36.9	9	16.7376	ABP
31	26.4	11.9748	39	63.2	28.667	36.8	8	16.6922	SBP
31	35	15.8757	41	71.8	32.5679	36.8	10	16.6922	ABP
29	28.6	12.9727	42	65.3	29.6196	36.7	13	16.6468	ABP
28	21.4	9.70688	41	58	26.3084	36.6	13	16.6015	ABP
30	26.6	12.0656	38	63.2	28.667	36.6	8	16.6015	ABP
29	27.2	12.3377	38	63.8	28.9392	36.6	9	16.6015	SBP
30	28.4	12.882	37	64.9	29.4381	36.5	7	16.5561	SBP
33	34	15.4221	40	70.5	31.9783	36.5	7	16.5561	ABP
35	42.8	19.4138	41	79.3	35.9699	36.5	6	16.5561	SBP
33	31	14.0614	41	67.5	30.6175	36.5	8	16.5561	ABP
31	26.2	11.8841	38	62.7	28.4402	36.5	7	16.5561	SBP
27	22	9.97903	35	58.5	26.5352	36.5	8	16.5561	ABP
37	41	18.5973	43	77.4	35.108	36.4	6	16.5108	ABP
34	34.4	15.6036	40	70.8	32.1143	36.4	6	16.5108	SBP
34	35.2	15.9665	39	71.5	32.4319	36.3	5	16.4654	ABP
31	20.2	9.16257	40	56.5	25.628	36.3	9	16.4654	ABP
35	37.8	17.1458	43	74	33.5658	36.2	8	16.42	ABP
30	30.2	13.6985	40	66.4	30.1185	36.2	10	16.42	ABP
37	40.4	18.3251	47	76.6	34.7452	36.2	10	16.42	ABP
31	28.4	12.882	37	64.6	29.3021	36.2	6	16.42	SBP
33	30.8	13.9706	40	66.9	30.3453	36.1	7	16.3747	ABP
35	34.4	15.6036	42	70.5	31.9783	36.1	7	16.3747	SBP
35	35.6	16.1479	41	71.7	32.5226	36.1	6	16.3747	SBP
34	31.2	14.1521	39	67.3	30.5268	36.1	5	16.3747	ABP
36	38.4	17.4179	41	74.4	33.7473	36	5	16.3293	SBP
34	31	14.0614	37	67	30.3907	36	3	16.3293	SBP
32	36.6	16.6015	42	72.5	32.8854	35.9	10	16.284	ABP
32	28.6	12.9727	38	64.4	29.2113	35.8	6	16.2386	SBP
34	36	16.3293	38	71.8	32.5679	35.8	4	16.2386	ABP
26	19.8	8.98113	35	55.6	25.2197	35.8	9	16.2386	SBP
32	30	13.6078	40	65.7	29.801	35.7	8	16.1932	SBP
27	19	8.61826	37	54.6	24.7661	35.6	10	16.1479	ABP
33	25.2	11.4305	37	60.8	27.5784	35.6	4	16.1479	SBP
33	31.2	14.1521	40	66.8	30.3	35.6	7	16.1479	ABP
31	31	14.0614	38	66.5	30.1639	35.5	7	16.1025	ABP
34	34	15.4221	41	69.5	31.5247	35.5	7	16.1025	SBP
35	37	16.7829	40	72.5	32.8854	35.5	5	16.1025	SBP
33	31	14.0614	39	66.5	30.1639	35.5	6	16.1025	SBP
35	34	15.4221	42	69.4	31.4793	35.4	7	16.0572	ABP
36	38.6	17.5087	43	74	33.5658	35.4	7	16.0572	ABP
29	27.6	12.5191	40	63	28.5763	35.4	11	16.0572	SBP
29	27.2	12.3377	38	62.4	28.3042	35.2	9	15.9665	SBP
31	30	13.6078	37	65.2	29.5742	35.2	6	15.9665	ABP
35	33.6	15.2407	41	68.8	31.2072	35.2	6	15.9665	SBP
33	34.8	15.785	39	69.9	31.7061	35.1	6	15.9211	ABP
32	25.8	11.7027	39	60.9	27.6238	35.1	7	15.9211	SBP
32	34.2	15.5129	40	69.3	31.434	35.1	8	15.9211	SBP
32	32.2	14.6057	39	67.3	30.5268	35.1	7	15.9211	SBP
35	33.4	15.15	42	68.4	31.0257	35	7	15.8757	ABP
35	32.2	14.6057	38	67.2	30.4814	35	3	15.8757	ABP
30	29.8	13.5171	42	64.8	29.3928	35	12	15.8757	SBP
33	28.6	12.9727	41	63.6	28.8485	35	8	15.8757	SBP
33	35.8	16.2386	43	70.8	32.1143	35	10	15.8757	ABP
32	35.8	16.2386	40	70.7	32.069	34.9	8	15.8304	ABP
32	28.2	12.7913	37	63.1	28.6217	34.9	5	15.8304	SBP
31	29.8	13.5171	39	64.7	29.3474	34.9	8	15.8304	ABP
26	18.2	8.25538	35	53.1	24.0858	34.9	9	15.8304	SBP
35	34	15.4221	43	68.9	31.2525	34.9	8	15.8304	SBP
38	40.6	18.4159	43	75.5	34.2462	34.9	5	15.8304	SBP
37	37.4	16.9644	42	72.2	32.7494	34.8	5	15.785	ABP
31	33	14.9685	39	67.8	30.7536	34.8	8	15.785	ABP
27	27.6	12.5191	37	62.4	28.3042	34.8	10	15.785	ABP
35	35	15.8757	39	69.8	31.6607	34.8	4	15.785	ABP
31	27.8	12.6099	37	62.5	28.3495	34.7	6	15.7397	SBP
28	26.4	11.9748	40	61.1	27.7145	34.7	12	15.7397	SBP
36	36.2	16.42	40	70.9	32.1597	34.7	4	15.7397	ABP
31	30.6	13.8799	37	65.3	29.6196	34.7	6	15.7397	ABP
33	30.4	13.7892	38	65.1	29.5289	34.7	5	15.7397	ABP
34	34.4	15.6036	40	69	31.2979	34.6	6	15.6943	ABP
29	23.6	10.7048	39	58.2	26.3991	34.6	10	15.6943	SBP
28	22.8	10.3419	34	57.4	26.0362	34.6	6	15.6943	ABP
29	26.8	12.1563	39	61.4	27.8506	34.6	10	15.6943	ABP
29	23.8	10.7955	36	58.4	26.4898	34.6	7	15.6943	ABP
33	32.4	14.6964	42	66.9	30.3453	34.5	9	15.6489	SBP
29	29.1	13.1995	40	63.6	28.8485	34.5	11	15.6489	ABP
36	33.8	15.3314	39	68.3	30.9804	34.5	3	15.6489	SBP
32	26.2	11.8841	41	60.7	27.5331	34.5	9	15.6489	SBP
32	32	14.515	38	66.5	30.1639	34.5	6	15.6489	SBP
32	27.6	12.5191	37	62.1	28.1681	34.5	5	15.6489	SBP
34	38.8	17.5994	39	73.2	33.203	34.4	5	15.6036	SBP
31	32.2	14.6057	39	66.5	30.1639	34.3	8	15.5582	ABP
35	35	15.8757	41	69.3	31.434	34.3	6	15.5582	SBP
35	38	17.2365	41	72.3	32.7947	34.3	6	15.5582	SBP
26	21.8	9.88831	37	56	25.4012	34.2	11	15.5129	ABP
35	33.2	15.0593	40	67.4	30.5721	34.2	5	15.5129	SBP
35	36.4	16.5108	41	70.6	32.0236	34.2	6	15.5129	ABP
36	40.4	18.3251	40	74.6	33.838	34.2	4	15.5129	SBP
25	23	10.4326	36	57.1	25.9001	34.1	11	15.4675	ABP
29	25.6	11.612	39	59.7	27.0795	34.1	10	15.4675	ABP
33	34.6	15.6943	38	68.7	31.1618	34.1	5	15.4675	ABP
35	39	17.6901	40	73.1	33.1576	34.1	5	15.4675	ABP
35	36.4	16.5108	41	70.4	31.9329	34	6	15.4221	SBP
30	27	12.247	35	61	27.6691	34	5	15.4221	SBP
34	29	13.1542	40	63	28.5763	34	6	15.4221	SBP
33	31.2	14.1521	39	65.2	29.5742	34	6	15.4221	ABP
30	28.4	12.882	40	62.4	28.3042	34	10	15.4221	SBP
32	17.3	7.84715	35	51.2	23.2239	33.9	3	15.3768	SBP
33	43.3	19.6405	41	77.2	35.0173	33.9	8	15.3768	ABP
29	25.4	11.5212	39	59.3	26.898	33.9	10	15.3768	ABP
31	27	12.247	38	60.9	27.6238	33.9	7	15.3768	ABP
29	27.4	12.4284	37	61.3	27.8052	33.9	8	15.3768	ABP
29	24.2	10.9769	36	58	26.3084	33.8	7	15.3314	ABP
31	32.2	14.6057	40	65.9	29.8917	33.7	9	15.2861	SBP
29	25.2	11.4305	35	58.9	26.7166	33.7	6	15.2861	SBP
33	28.6	12.9727	44	62.2	28.2134	33.6	11	15.2407	ABP
32	32	14.515	41	65.6	29.7557	33.6	9	15.2407	SBP
27	22.4	10.1605	38	55.9	25.3558	33.5	11	15.1953	ABP
31	27	12.247	39	60.5	27.4423	33.5	8	15.1953	SBP
30	29.2	13.2449	38	62.7	28.4402	33.5	8	15.1953	SBP
21	25.4	11.5212	39	58.9	26.7166	33.5	18	15.1953	SBP
30	36.2	16.42	40	69.7	31.6154	33.5	10	15.1953	SBP
29	23.4	10.6141	37	56.9	25.8094	33.5	8	15.1953	SBP
35	41	18.5973	39	74.4	33.7473	33.4	4	15.15	ABP
34	35.2	15.9665	39	68.6	31.1164	33.4	5	15.15	SBP
31	28.8	13.0635	41	62.1	28.1681	33.3	10	15.1046	ABP
35	31	14.0614	40	64.3	29.166	33.3	5	15.1046	SBP
29	27.4	12.4284	35	60.6	27.4877	33.2	6	15.0593	ABP
32	23.4	10.6141	36	56.6	25.6733	33.2	4	15.0593	SBP
33	35.4	16.0572	40	68.6	31.1164	33.2	7	15.0593	SBP
36	40.8	18.5066	46	73.9	33.5205	33.1	10	15.0139	SBP
32	27	12.247	37	60.1	27.2609	33.1	5	15.0139	SBP
33	31.6	14.3335	40	64.7	29.3474	33.1	7	15.0139	SBP
32	30.4	13.7892	38	63.5	28.8031	33.1	6	15.0139	SBP
33	31.6	14.3335	39	64.7	29.3474	33.1	6	15.0139	SBP
28	20.8	9.43472	35	53.9	24.4486	33.1	7	15.0139	ABP
35	33.4	15.15	37	66.4	30.1185	33	2	14.9685	SBP
30	29	13.1542	40	62	28.1227	33	10	14.9685	ABP
29	23.8	10.7955	36	56.7	25.7187	32.9	7	14.9232	SBP
30	27.4	12.4284	36	60.2	27.3063	32.8	6	14.8778	SBP
28	25.2	11.4305	37	58	26.3084	32.8	9	14.8778	ABP
35	37.8	17.1458	40	70.6	32.0236	32.8	5	14.8778	ABP
35	35.2	15.9665	42	67.9	30.7989	32.7	7	14.8325	SBP
28	23.2	10.5233	38	55.9	25.3558	32.7	10	14.8325	SBP
36	43	19.5045	39	75.7	34.3369	32.7	3	14.8325	ABP
29	28.4	12.882	37	61.1	27.7145	32.7	8	14.8325	SBP
32	30.2	13.6985	40	62.9	28.531	32.7	8	14.8325	ABP
31	33.6	15.2407	39	66.3	30.0732	32.7	8	14.8325	SBP
32	34.4	15.6036	40	67.1	30.436	32.7	8	14.8325	SBP
32	30.4	13.7892	38	63	28.5763	32.6	6	14.7871	ABP
33	32.4	14.6964	41	65	29.4835	32.6	8	14.7871	ABP
29	25.6	11.612	36	58.2	26.3991	32.6	7	14.7871	SBP
29	26.8	12.1563	39	59.4	26.9434	32.6	10	14.7871	ABP
31	29.2	13.2449	36	61.8	28.032	32.6	5	14.7871	SBP
33	35.2	15.9665	38	67.8	30.7536	32.6	5	14.7871	SBP
29	24.2	10.9769	40	56.8	25.764	32.6	11	14.7871	SBP
31	28.6	12.9727	39	61.1	27.7145	32.5	8	14.7418	SBP
36	36	16.3293	39	68.5	31.0711	32.5	3	14.7418	ABP
35	39.6	17.9623	42	72	32.6587	32.4	7	14.6964	SBP
31	31	14.0614	37	63.4	28.7578	32.4	6	14.6964	SBP
31	29.4	13.3356	38	61.8	28.032	32.4	7	14.6964	ABP
30	32.6	14.7871	39	65	29.4835	32.4	9	14.6964	ABP
30	31.4	14.2428	38	63.7	28.8938	32.3	8	14.651	ABP
31	27.6	12.5191	38	59.9	27.1702	32.3	7	14.651	ABP
31	22.2	10.0698	36	54.5	24.7208	32.3	5	14.651	ABP
29	31.8	14.4242	39	64.1	29.0753	32.3	10	14.651	SBP
33	32.2	14.6057	41	64.4	29.2113	32.2	8	14.6057	ABP
35	27.8	12.6099	41	60	27.2155	32.2	6	14.6057	SBP
35	39	17.6901	39	71.2	32.2958	32.2	4	14.6057	ABP
33	30.2	13.6985	40	62.4	28.3042	32.2	7	14.6057	SBP
36	39.6	17.9623	40	71.8	32.5679	32.2	4	14.6057	ABP
35	33.4	15.15	44	65.6	29.7557	32.2	9	14.6057	ABP
30	32.4	14.6964	37	64.5	29.2567	32.1	7	14.5603	SBP
31	27.6	12.5191	36	59.7	27.0795	32.1	5	14.5603	SBP
30	28.8	13.0635	36	60.9	27.6238	32.1	6	14.5603	ABP
30	29	13.1542	38	61	27.6691	32	8	14.515	ABP
31	30	13.6078	39	62	28.1227	32	8	14.515	ABP
33	31.2	14.1521	40	63.2	28.667	32	7	14.515	ABP
30	27.6	12.5191	37	59.6	27.0341	32	7	14.515	ABP
34	31.4	14.2428	40	63.4	28.7578	32	6	14.515	ABP
31	28.4	12.882	37	60.4	27.397	32	6	14.515	SBP
29	25.8	11.7027	36	57.8	26.2176	32	7	14.515	ABP
35	40.6	18.4159	37	72.6	32.9308	32	2	14.515	ABP
28	22.2	10.0698	38	54.1	24.5393	31.9	10	14.4696	ABP
29	26.2	11.8841	40	58.1	26.3537	31.9	11	14.4696	ABP
34	33.2	15.0593	42	65.1	29.5289	31.9	8	14.4696	ABP
35	20.4	9.25328	35	52.2	23.6775	31.8	0	14.4242	SBP
29	15.6	7.07604	36	47.4	21.5003	31.8	7	14.4242	SBP
31	27.6	12.5191	39	59.4	26.9434	31.8	8	14.4242	SBP
36	34.8	15.785	40	66.6	30.2093	31.8	4	14.4242	SBP
35	38.2	17.3272	40	69.9	31.7061	31.7	5	14.3789	SBP
30	25.8	11.7027	38	57.5	26.0816	31.7	8	14.3789	ABP
35	31.8	14.4242	39	63.5	28.8031	31.7	4	14.3789	ABP
33	31.8	14.4242	38	63.5	28.8031	31.7	5	14.3789	SBP
32	33.4	15.15	40	65.1	29.5289	31.7	8	14.3789	ABP
31	35.6	16.1479	38	67.3	30.5268	31.7	7	14.3789	SBP
28	28.6	12.9727	38	60.3	27.3516	31.7	10	14.3789	ABP
33	34.8	15.785	38	66.4	30.1185	31.6	5	14.3335	ABP
31	32.4	14.6964	38	64	29.0299	31.6	7	14.3335	SBP
33	32	14.515	38	63.6	28.8485	31.6	5	14.3335	SBP
31	27.6	12.5191	37	59.2	26.8527	31.6	6	14.3335	SBP
33	32.2	14.6057	39	63.8	28.9392	31.6	6	14.3335	SBP
36	40.2	18.2344	42	71.7	32.5226	31.5	6	14.2882	ABP
32	33.6	15.2407	40	65.1	29.5289	31.5	8	14.2882	SBP
32	34	15.4221	40	65.4	29.6649	31.4	8	14.2428	SBP
34	33	14.9685	41	64.4	29.2113	31.4	7	14.2428	ABP
29	22.8	10.3419	38	54.2	24.5847	31.4	9	14.2428	ABP
29	31	14.0614	39	62.4	28.3042	31.4	10	14.2428	ABP
33	29.4	13.3356	40	60.8	27.5784	31.4	7	14.2428	SBP
35	30.4	13.7892	41	61.8	28.032	31.4	6	14.2428	ABP
30	28.4	12.882	36	59.7	27.0795	31.3	6	14.1974	ABP
30	24.4	11.0677	35	55.7	25.2651	31.3	5	14.1974	ABP
31	27.8	12.6099	39	59.1	26.8073	31.3	8	14.1974	ABP
32	31	14.0614	39	62.3	28.2588	31.3	7	14.1974	ABP
35	33	14.9685	38	64.3	29.166	31.3	3	14.1974	ABP
35	35.2	15.9665	36	66.4	30.1185	31.2	1	14.1521	ABP
34	38.6	17.5087	40	69.8	31.6607	31.2	6	14.1521	SBP
36	37.6	17.0551	38	68.8	31.2072	31.2	2	14.1521	ABP
31	32.6	14.7871	41	63.7	28.8938	31.1	10	14.1067	ABP
31	25	11.3398	40	56.1	25.4465	31.1	9	14.1067	SBP
30	24.6	11.1584	36	55.7	25.2651	31.1	6	14.1067	SBP
32	27.6	12.5191	40	58.7	26.6259	31.1	8	14.1067	SBP
36	36.6	16.6015	44	67.7	30.7082	31.1	8	14.1067	SBP
35	39	17.6901	43	70.1	31.7968	31.1	8	14.1067	ABP
28	21.2	9.61616	35	52.2	23.6775	31	7	14.0614	SBP
32	33	14.9685	37	64	29.0299	31	5	14.0614	ABP
31	30.6	13.8799	38	61.6	27.9413	31	7	14.0614	SBP
32	31.2	14.1521	38	62.1	28.1681	30.9	6	14.016	SBP
29	12.4	5.62455	33	43.3	19.6405	30.9	4	14.016	SBP
31	29.6	13.4263	39	60.5	27.4423	30.9	8	14.016	SBP
33	36.2	16.42	37	67.1	30.436	30.9	4	14.016	ABP
30	26.4	11.9748	37	57.2	25.9455	30.8	7	13.9706	ABP
36	37.6	17.0551	39	68.4	31.0257	30.8	3	13.9706	SBP
31	28.4	12.882	38	59.2	26.8527	30.8	7	13.9706	SBP
31	31.2	14.1521	38	62	28.1227	30.8	7	13.9706	SBP
31	30	13.6078	40	60.8	27.5784	30.8	9	13.9706	ABP
33	31.6	14.3335	38	62.4	28.3042	30.8	5	13.9706	ABP
32	33	14.9685	37	63.7	28.8938	30.7	5	13.9253	SBP
30	28	12.7006	39	58.7	26.6259	30.7	9	13.9253	ABP
33	31	14.0614	40	61.7	27.9866	30.7	7	13.9253	SBP
32	31.8	14.4242	39	62.5	28.3495	30.7	7	13.9253	SBP
32	29.8	13.5171	37	60.5	27.4423	30.7	5	13.9253	SBP
36	40.4	18.3251	40	71.1	32.2504	30.7	4	13.9253	SBP
35	34.3	15.5582	41	64.9	29.4381	30.6	6	13.8799	SBP
30	26.6	12.0656	37	57.2	25.9455	30.6	7	13.8799	SBP
28	22.6	10.2512	35	53.2	24.1311	30.6	7	13.8799	SBP
32	31.8	14.4242	37	62.4	28.3042	30.6	5	13.8799	ABP
34	29.8	13.5171	38	60.4	27.397	30.6	4	13.8799	SBP
31	29.2	13.2449	40	59.8	27.1248	30.6	9	13.8799	SBP
29	16.2	7.3482	35	46.7	21.1828	30.5	6	13.8346	SBP
30	28.2	12.7913	39	58.7	26.6259	30.5	9	13.8346	ABP
32	29	13.1542	37	59.5	26.9887	30.5	5	13.8346	SBP
33	29	13.1542	39	59.5	26.9887	30.5	6	13.8346	SBP
33	31	14.0614	38	61.5	27.8959	30.5	5	13.8346	SBP
35	32.4	14.6964	39	62.9	28.531	30.5	4	13.8346	SBP
31	24.8	11.2491	36	55.3	25.0837	30.5	5	13.8346	SBP
32	31.8	14.4242	38	62.2	28.2134	30.4	6	13.7892	SBP
32	28.3	12.8367	39	58.7	26.6259	30.4	7	13.7892	SBP
32	35.6	16.1479	39	66	29.9371	30.4	7	13.7892	SBP
26	19.6	8.89041	35	50	22.6796	30.4	9	13.7892	SBP
30	27.6	12.5191	36	58	26.3084	30.4	6	13.7892	ABP
32	30.4	13.7892	41	60.8	27.5784	30.4	9	13.7892	ABP
31	32.4	14.6964	37	62.7	28.4402	30.3	6	13.7438	SBP
25	18.2	8.25538	35	48.5	21.9992	30.3	10	13.7438	SBP
29	25.2	11.4305	37	55.5	25.1744	30.3	8	13.7438	ABP
35	36	16.3293	40	66.3	30.0732	30.3	5	13.7438	SBP
36	37.2	16.8736	41	67.5	30.6175	30.3	5	13.7438	ABP
32	35.2	15.9665	37	65.4	29.6649	30.2	5	13.6985	SBP
26	20.4	9.25328	34	50.6	22.9518	30.2	8	13.6985	SBP
32	32	14.515	38	62.2	28.2134	30.2	6	13.6985	SBP
31	29.8	13.5171	37	60	27.2155	30.2	6	13.6985	SBP
30	26.6	12.0656	39	56.8	25.764	30.2	9	13.6985	ABP
33	29	13.1542	39	59.1	26.8073	30.1	6	13.6531	SBP
27	24.8	11.2491	37	54.9	24.9022	30.1	10	13.6531	ABP
28	18.8	8.52754	37	48.9	22.1807	30.1	9	13.6531	SBP
35	39.2	17.7808	38	69.3	31.434	30.1	3	13.6531	SBP
35	35	15.8757	40	65.1	29.5289	30.1	5	13.6531	ABP
31	29.2	13.2449	37	59.2	26.8527	30	6	13.6078	ABP
35	34.2	15.5129	40	64.2	29.1206	30	5	13.6078	ABP
27	32.2	14.6057	37	62.2	28.2134	30	10	13.6078	SBP
33	33.6	15.2407	39	63.6	28.8485	30	6	13.6078	SBP
29	26.8	12.1563	37	56.8	25.764	30	8	13.6078	ABP
35	40.8	18.5066	40	70.7	32.069	29.9	5	13.5624	SBP
33	32.8	14.8778	38	62.7	28.4402	29.9	5	13.5624	SBP
28	24.4	11.0677	33	54.3	24.6301	29.9	5	13.5624	SBP
32	26.6	12.0656	40	56.5	25.628	29.9	8	13.5624	SBP
31	29.2	13.2449	35	59	26.7619	29.8	4	13.5171	SBP
32	35	15.8757	35	64.8	29.3928	29.8	3	13.5171	SBP
36	34.2	15.5129	41	64	29.0299	29.8	5	13.5171	ABP
33	34.2	15.5129	41	64	29.0299	29.8	8	13.5171	ABP
29	26.6	12.0656	37	56.4	25.5826	29.8	8	13.5171	SBP
32	29.4	13.3356	38	59.1	26.8073	29.7	6	13.4717	ABP
31	34	15.4221	38	63.7	28.8938	29.7	7	13.4717	ABP
31	30	13.6078	36	59.7	27.0795	29.7	5	13.4717	ABP
34	33.4	15.15	40	63.1	28.6217	29.7	6	13.4717	SBP
33	32	14.515	38	61.7	27.9866	29.7	5	13.4717	SBP
32	26.2	11.8841	36	55.9	25.3558	29.7	4	13.4717	SBP
31	31.2	14.1521	38	60.9	27.6238	29.7	7	13.4717	SBP
31	30.2	13.6985	39	59.9	27.1702	29.7	8	13.4717	SBP
33	33.6	15.2407	38	63.3	28.7124	29.7	5	13.4717	SBP
34	27.6	12.5191	39	57.3	25.9908	29.7	5	13.4717	SBP
33	36.4	16.5108	41	66	29.9371	29.6	8	13.4263	ABP
31	28.4	12.882	38	58	26.3084	29.6	7	13.4263	ABP
32	32.6	14.7871	40	62.2	28.2134	29.6	8	13.4263	SBP
30	27.8	12.6099	42	57.4	26.0362	29.6	12	13.4263	ABP
30	28.8	13.0635	37	58.4	26.4898	29.6	7	13.4263	SBP
35	29.8	13.5171	38	59.4	26.9434	29.6	3	13.4263	ABP
31	32.2	14.6057	37	61.8	28.032	29.6	6	13.4263	ABP
32	32.2	14.6057	39	61.8	28.032	29.6	7	13.4263	ABP
32	31.2	14.1521	39	60.7	27.5331	29.5	7	13.381	SBP
29	26	11.7934	36	55.5	25.1744	29.5	7	13.381	SBP
36	39.8	18.053	40	69.3	31.434	29.5	4	13.381	SBP
32	36	16.3293	37	65.5	29.7103	29.5	5	13.381	ABP
31	29	13.1542	37	58.5	26.5352	29.5	6	13.381	SBP
28	19.4	8.79969	35	48.9	22.1807	29.5	7	13.381	SBP
30	27.6	12.5191	36	57.1	25.9001	29.5	6	13.381	SBP
36	36.6	16.6015	40	66.1	29.9825	29.5	4	13.381	SBP
36	37.6	17.0551	41	67.1	30.436	29.5	5	13.381	ABP
34	28.2	12.7913	41	57.6	26.1269	29.4	7	13.3356	ABP
31	31.4	14.2428	35	60.8	27.5784	29.4	4	13.3356	SBP
35	34.2	15.5129	40	63.6	28.8485	29.4	5	13.3356	ABP
28	23	10.4326	35	52.4	23.7682	29.4	7	13.3356	ABP
33	35.6	16.1479	40	65	29.4835	29.4	7	13.3356	ABP
35	34.2	15.5129	38	63.5	28.8031	29.3	3	13.2903	SBP
30	27.6	12.5191	35	56.9	25.8094	29.3	5	13.2903	ABP
32	28	12.7006	37	57.3	25.9908	29.3	5	13.2903	ABP
29	25	11.3398	36	54.2	24.5847	29.2	7	13.2449	SBP
32	31	14.0614	37	60.2	27.3063	29.2	5	13.2449	SBP
37	41.2	18.688	42	70.4	31.9329	29.2	5	13.2449	SBP
35	36	16.3293	40	65.2	29.5742	29.2	5	13.2449	ABP
31	20.4	9.25328	36	49.6	22.4982	29.2	5	13.2449	ABP
35	36.2	16.42	39	65.4	29.6649	29.2	4	13.2449	SBP
23	13.8	6.25957	32	43	19.5045	29.2	9	13.2449	SBP
30	27.8	12.6099	38	57	25.8548	29.2	8	13.2449	ABP
29	26.2	11.8841	36	55.4	25.129	29.2	7	13.2449	SBP
27	24.2	10.9769	36	53.4	24.2218	29.2	9	13.2449	SBP
32	32.6	14.7871	39	61.8	28.032	29.2	7	13.2449	ABP
32	28.6	12.9727	40	57.7	26.1723	29.1	8	13.1995	ABP
31	29.6	13.4263	36	58.7	26.6259	29.1	5	13.1995	SBP
33	30.4	13.7892	38	59.5	26.9887	29.1	5	13.1995	ABP
30	26.8	12.1563	37	55.9	25.3558	29.1	7	13.1995	ABP
30	24.8	11.2491	38	53.9	24.4486	29.1	8	13.1995	SBP
34	34.2	15.5129	38	63.3	28.7124	29.1	4	13.1995	SBP
27	20.6	9.344	34	49.6	22.4982	29	7	13.1542	SBP
35	36.5	16.5561	39	65.5	29.7103	29	4	13.1542	ABP
31	37.2	16.8736	39	66.2	30.0278	29	8	13.1542	SBP
36	41.8	18.9602	43	70.7	32.069	28.9	7	13.1088	ABP
27	22.2	10.0698	39	51.1	23.1786	28.9	12	13.1088	ABP
29	27.2	12.3377	38	56.1	25.4465	28.9	9	13.1088	SBP
32	30.2	13.6985	41	59.1	26.8073	28.9	9	13.1088	SBP
29	26.4	11.9748	37	55.3	25.0837	28.9	8	13.1088	ABP
27	29	13.1542	36	57.8	26.2176	28.8	9	13.0635	ABP
33	35.2	15.9665	39	64	29.0299	28.8	6	13.0635	SBP
30	23.6	10.7048	39	52.4	23.7682	28.8	9	13.0635	ABP
30	22	9.97903	35	50.8	23.0425	28.8	5	13.0635	SBP
34	35	15.8757	40	63.8	28.9392	28.8	6	13.0635	ABP
35	38.8	17.5994	39	67.5	30.6175	28.7	4	13.0181	ABP
37	48.2	21.8632	41	76.9	34.8813	28.7	4	13.0181	SBP
36	44.2	20.0488	38	72.9	33.0669	28.7	2	13.0181	ABP
30	24.6	11.1584	37	53.3	24.1765	28.7	7	13.0181	ABP
30	32.6	14.7871	39	61.3	27.8052	28.7	9	13.0181	SBP
33	28.6	12.9727	37	57.2	25.9455	28.6	4	12.9727	ABP
30	28.4	12.882	37	57	25.8548	28.6	7	12.9727	SBP
30	29.2	13.2449	36	57.8	26.2176	28.6	6	12.9727	ABP
32	31.2	14.1521	40	59.8	27.1248	28.6	8	12.9727	SBP
38	44	19.9581	41	72.6	32.9308	28.6	3	12.9727	SBP
32	32.4	14.6964	36	60.9	27.6238	28.5	4	12.9274	ABP
35	33.4	15.15	39	61.9	28.0774	28.5	4	12.9274	SBP
35	36.8	16.6922	39	65.2	29.5742	28.4	4	12.882	SBP
32	32.6	14.7871	38	61	27.6691	28.4	6	12.882	ABP
30	28.4	12.882	40	56.7	25.7187	28.3	10	12.8367	ABP
30	31.8	14.4242	37	60.1	27.2609	28.3	7	12.8367	SBP
35	38	17.2365	43	66.3	30.0732	28.3	8	12.8367	ABP
30	30	13.6078	38	58.3	26.4444	28.3	8	12.8367	ABP
34	35.5	16.1025	39	63.8	28.9392	28.3	5	12.8367	ABP
31	34.4	15.6036	38	62.6	28.3949	28.2	7	12.7913	SBP
34	31.4	14.2428	39	59.6	27.0341	28.2	5	12.7913	SBP
32	33.4	15.15	38	61.6	27.9413	28.2	6	12.7913	SBP
32	35.4	16.0572	42	63.6	28.8485	28.2	10	12.7913	SBP
31	32.4	14.6964	38	60.6	27.4877	28.2	7	12.7913	SBP
27	27.4	12.4284	36	55.6	25.2197	28.2	9	12.7913	ABP
30	26.4	11.9748	36	54.6	24.7661	28.2	6	12.7913	SBP
26	19.2	8.70897	35	47.4	21.5003	28.2	9	12.7913	ABP
32	30.8	13.9706	37	59	26.7619	28.2	5	12.7913	SBP
35	37.6	17.0551	41	65.8	29.8464	28.2	6	12.7913	SBP
35	34.6	15.6943	39	62.7	28.4402	28.1	4	12.7459	SBP
32	34.3	15.5582	38	62.4	28.3042	28.1	6	12.7459	ABP
32	32.8	14.8778	36	60.9	27.6238	28.1	4	12.7459	SBP
30	28.4	12.882	35	56.5	25.628	28.1	5	12.7459	ABP
35	33.8	15.3314	39	61.9	28.0774	28.1	4	12.7459	SBP
31	28.4	12.882	40	56.5	25.628	28.1	9	12.7459	ABP
31	26.8	12.1563	39	54.9	24.9022	28.1	8	12.7459	ABP
29	27.2	12.3377	35	55.2	25.0383	28	6	12.7006	SBP
25	21.2	9.61616	33	49.2	22.3167	28	8	12.7006	SBP
25	19.2	8.70897	35	47.2	21.4096	28	10	12.7006	ABP
34	23.4	10.6141	38	51.4	23.3146	28	4	12.7006	SBP
30	28.6	12.9727	37	56.6	25.6733	28	7	12.7006	ABP
30	27.4	12.4284	36	55.4	25.129	28	6	12.7006	SBP
27	17.4	7.89251	36	45.4	20.5931	28	9	12.7006	SBP
32	30.8	13.9706	37	58.8	26.6712	28	5	12.7006	ABP
29	24.8	11.2491	39	52.8	23.9497	28	10	12.7006	ABP
27	20.8	9.43472	33	48.8	22.1353	28	6	12.7006	SBP
32	31.8	14.4242	39	59.8	27.1248	28	7	12.7006	SBP
29	27.2	12.3377	35	55.1	24.9929	27.9	6	12.6552	SBP
28	18.2	8.25538	36	46.1	20.9106	27.9	8	12.6552	SBP
35	36.6	16.6015	39	64.5	29.2567	27.9	4	12.6552	ABP
28	28.4	12.882	35	56.3	25.5373	27.9	7	12.6552	SBP
36	36.6	16.6015	41	64.5	29.2567	27.9	5	12.6552	SBP
35	40.2	18.2344	41	68.1	30.8896	27.9	6	12.6552	ABP
29	25.4	11.5212	36	53.2	24.1311	27.8	7	12.6099	SBP
35	30.8	13.9706	39	58.6	26.5805	27.8	4	12.6099	ABP
34	37	16.7829	37	64.8	29.3928	27.8	3	12.6099	ABP
27	19	8.61826	35	46.8	21.2281	27.8	8	12.6099	ABP
30	25	11.3398	40	52.8	23.9497	27.8	10	12.6099	SBP
31	31.4	14.2428	37	59.1	26.8073	27.7	6	12.5645	ABP
29	24.8	11.2491	37	52.5	23.8136	27.7	8	12.5645	ABP
32	30.8	13.9706	36	58.5	26.5352	27.7	4	12.5645	SBP
23	12.8	5.80598	33	40.5	18.3705	27.7	10	12.5645	SBP
30	27.8	12.6099	38	55.5	25.1744	27.7	8	12.5645	SBP
30	31.6	14.3335	37	59.3	26.898	27.7	7	12.5645	ABP
29	28.6	12.9727	37	56.3	25.5373	27.7	8	12.5645	SBP
31	27.6	12.5191	36	55.2	25.0383	27.6	5	12.5191	SBP
34	32.8	14.8778	38	60.4	27.397	27.6	4	12.5191	SBP
29	27.8	12.6099	37	55.4	25.129	27.6	8	12.5191	ABP
32	27.8	12.6099	37	55.4	25.129	27.6	5	12.5191	ABP
35	34.6	15.6943	38	62.1	28.1681	27.5	3	12.4738	SBP
32	30.4	13.7892	38	57.9	26.263	27.5	6	12.4738	ABP
30	27.4	12.4284	35	54.9	24.9022	27.5	5	12.4738	SBP
33	33.8	15.3314	36	61.2	27.7599	27.4	3	12.4284	SBP
29	23.5	10.6594	36	50.9	23.0879	27.4	7	12.4284	ABP
30	30.6	13.8799	36	58	26.3084	27.4	6	12.4284	SBP
30	26.8	12.1563	37	54.1	24.5393	27.3	7	12.3831	ABP
28	22.8	10.3419	33	50.1	22.725	27.3	5	12.3831	SBP
26	21.6	9.7976	35	48.9	22.1807	27.3	9	12.3831	ABP
29	21	9.52544	35	48.3	21.9085	27.3	6	12.3831	ABP
31	29	13.1542	37	56.3	25.5373	27.3	6	12.3831	SBP
31	29.8	13.5171	36	57	25.8548	27.2	5	12.3377	SBP
28	27.2	12.3377	35	54.4	24.6754	27.2	7	12.3377	SBP
25	36.6	16.6015	38	63.7	28.8938	27.1	13	12.2924	ABP
30	26	11.7934	38	53.1	24.0858	27.1	8	12.2924	ABP
35	32	14.515	38	59.1	26.8073	27.1	3	12.2924	ABP
33	35.3	16.0118	37	62.4	28.3042	27.1	4	12.2924	SBP
32	30.8	13.9706	37	57.9	26.263	27.1	5	12.2924	SBP
28	22.2	10.0698	35	49.3	22.3621	27.1	7	12.2924	SBP
28	24.2	10.9769	37	51.3	23.2693	27.1	9	12.2924	SBP
30	26.2	11.8841	35	53.2	24.1311	27	5	12.247	ABP
30	29.2	13.2449	37	56.2	25.4919	27	7	12.247	SBP
32	31.6	14.3335	35	58.6	26.5805	27	3	12.247	ABP
32	33.8	15.3314	38	60.8	27.5784	27	6	12.247	SBP
34	33.2	15.0593	37	60.2	27.3063	27	3	12.247	SBP
29	27	12.247	35	54	24.494	27	6	12.247	SBP
30	28.6	12.9727	38	55.6	25.2197	27	8	12.247	ABP
35	33.8	15.3314	38	60.7	27.5331	26.9	3	12.2016	ABP
30	28.8	13.0635	38	55.7	25.2651	26.9	8	12.2016	ABP
31	30.2	13.6985	36	57.1	25.9001	26.9	5	12.2016	ABP
31	28.6	12.9727	38	55.5	25.1744	26.9	7	12.2016	SBP
35	32.4	14.6964	39	59.3	26.898	26.9	4	12.2016	ABP
33	30.4	13.7892	37	57.3	25.9908	26.9	4	12.2016	ABP
30	25.4	11.5212	35	52.2	23.6775	26.8	5	12.1563	SBP
28	26.8	12.1563	34	53.6	24.3126	26.8	6	12.1563	SBP
30	25	11.3398	36	51.8	23.4961	26.8	6	12.1563	ABP
33	34.6	15.6943	36	61.4	27.8506	26.8	3	12.1563	SBP
27	21	9.52544	36	47.7	21.6364	26.7	9	12.1109	SBP
35	35.4	16.0572	38	62.1	28.1681	26.7	3	12.1109	SBP
30	26.4	11.9748	37	53.1	24.0858	26.7	7	12.1109	SBP
32	27.4	12.4284	40	54.1	24.5393	26.7	8	12.1109	SBP
35	34.4	15.6036	39	61.1	27.7145	26.7	4	12.1109	SBP
29	31.2	14.1521	39	57.9	26.263	26.7	10	12.1109	ABP
29	29	13.1542	37	55.6	25.2197	26.6	8	12.0656	ABP
28	23.8	10.7955	36	50.4	22.8611	26.6	8	12.0656	ABP
26	15.8	7.16676	37	42.4	19.2323	26.6	11	12.0656	SBP
32	32.9	14.9232	37	59.4	26.9434	26.5	5	12.0202	SBP
32	36.8	16.6922	35	63.3	28.7124	26.5	3	12.0202	ABP
32	34.4	15.6036	37	60.9	27.6238	26.5	5	12.0202	SBP
33	38	17.2365	37	64.5	29.2567	26.5	4	12.0202	SBP
33	32	14.515	36	58.5	26.5352	26.5	3	12.0202	SBP
31	28	12.7006	36	54.5	24.7208	26.5	5	12.0202	SBP
32	30	13.6078	37	56.5	25.628	26.5	5	12.0202	SBP
36	40	18.1437	40	66.4	30.1185	26.4	4	11.9748	SBP
29	23.2	10.5233	38	49.6	22.4982	26.4	9	11.9748	ABP
28	21.8	9.88831	35	48.2	21.8632	26.4	7	11.9748	SBP
34	36	16.3293	39	62.4	28.3042	26.4	5	11.9748	ABP
30	27	12.247	36	53.4	24.2218	26.4	6	11.9748	SBP
35	32.4	14.6964	40	58.8	26.6712	26.4	5	11.9748	SBP
26	15.4	6.98532	31	41.8	18.9602	26.4	5	11.9748	SBP
32	29.6	13.4263	37	56	25.4012	26.4	5	11.9748	ABP
26	22.6	10.2512	35	48.9	22.1807	26.3	9	11.9295	ABP
29	23.4	10.6141	36	49.6	22.4982	26.2	7	11.8841	ABP
33	30	13.6078	38	56.2	25.4919	26.2	5	11.8841	ABP
33	29.8	13.5171	39	56	25.4012	26.2	6	11.8841	ABP
31	30.2	13.6985	36	56.4	25.5826	26.2	5	11.8841	SBP
28	21.2	9.61616	35	47.4	21.5003	26.2	7	11.8841	ABP
35	44.6	20.2302	43	70.8	32.1143	26.2	8	11.8841	ABP
26	20.6	9.344	36	46.7	21.1828	26.1	10	11.8388	ABP
29	29	13.1542	36	55.1	24.9929	26.1	7	11.8388	ABP
32	33	14.9685	37	59.1	26.8073	26.1	5	11.8388	SBP
25	19.6	8.89041	31	45.7	20.7292	26.1	6	11.8388	SBP
22	12.6	5.71526	34	38.7	17.554	26.1	12	11.8388	ABP
34	34.6	15.6943	38	60.7	27.5331	26.1	4	11.8388	ABP
31	29.6	13.4263	36	55.7	25.2651	26.1	5	11.8388	ABP
30	26.2	11.8841	36	52.3	23.7229	26.1	6	11.8388	ABP
35	33.2	15.0593	39	59.3	26.898	26.1	4	11.8388	ABP
32	32.2	14.6057	36	58.3	26.4444	26.1	4	11.8388	SBP
26	20.2	9.16257	35	46.2	20.956	26	9	11.7934	SBP
32	28.2	12.7913	37	54.2	24.5847	26	5	11.7934	SBP
30	22	9.97903	35	48	21.7724	26	5	11.7934	ABP
33	35	15.8757	38	61	27.6691	26	5	11.7934	SBP
31	31	14.0614	37	57	25.8548	26	6	11.7934	SBP
32	27.6	12.5191	35	53.6	24.3126	26	3	11.7934	ABP
35	36	16.3293	37	62	28.1227	26	2	11.7934	SBP
30	31	14.0614	36	57	25.8548	26	6	11.7934	ABP
35	39	17.6901	42	65	29.4835	26	7	11.7934	ABP
29	24.6	11.1584	35	50.6	22.9518	26	6	11.7934	SBP
30	25.6	11.612	37	51.6	23.4054	26	7	11.7934	ABP
32	29	13.1542	40	55	24.9476	26	8	11.7934	SBP
29	29.8	13.5171	35	55.8	25.3105	26	6	11.7934	ABP
29	26.2	11.8841	37	52.1	23.6322	25.9	8	11.748	SBP
29	26.2	11.8841	37	52.1	23.6322	25.9	8	11.748	SBP
31	29.2	13.2449	37	55.1	24.9929	25.9	6	11.748	SBP
32	33.6	15.2407	37	59.5	26.9887	25.9	5	11.748	ABP
27	24.6	11.1584	36	50.5	22.9064	25.9	9	11.748	ABP
35	32.4	14.6964	38	58.3	26.4444	25.9	3	11.748	SBP
35	37	16.7829	41	62.9	28.531	25.9	6	11.748	ABP
29	26.4	11.9748	37	52.2	23.6775	25.8	8	11.7027	SBP
35	33.8	15.3314	37	59.6	27.0341	25.8	2	11.7027	SBP
31	27.8	12.6099	36	53.6	24.3126	25.8	5	11.7027	ABP
32	28.2	12.7913	37	54	24.494	25.8	5	11.7027	SBP
34	30.2	13.6985	37	56	25.4012	25.8	3	11.7027	SBP
34	37	16.7829	39	62.8	28.4856	25.8	5	11.7027	ABP
35	37.6	17.0551	39	63.4	28.7578	25.8	4	11.7027	SBP
26	22	9.97903	35	47.8	21.6817	25.8	9	11.7027	ABP
31	32.6	14.7871	37	58.4	26.4898	25.8	6	11.7027	SBP
29	26	11.7934	36	51.8	23.4961	25.8	7	11.7027	SBP
29	24	10.8862	35	49.8	22.5889	25.8	6	11.7027	SBP
30	30.5	13.8346	38	56.3	25.5373	25.8	8	11.7027	ABP
33	32.2	14.6057	38	58	26.3084	25.8	5	11.7027	SBP
34	35.4	16.0572	39	61.1	27.7145	25.7	5	11.6573	SBP
30	31.9	14.4696	40	57.6	26.1269	25.7	10	11.6573	SBP
31	30.4	13.7892	37	56.1	25.4465	25.7	6	11.6573	ABP
28	27.3	12.3831	37	53	24.0404	25.7	9	11.6573	SBP
30	28.2	12.7913	35	53.9	24.4486	25.7	5	11.6573	ABP
30	26.2	11.8841	35	51.9	23.5414	25.7	5	11.6573	SBP
34	32.2	14.6057	38	57.9	26.263	25.7	4	11.6573	SBP
29	30.6	13.8799	35	56.3	25.5373	25.7	6	11.6573	ABP
28	25.4	11.5212	36	51	23.1332	25.6	8	11.612	ABP
32	34	15.4221	37	59.6	27.0341	25.6	5	11.612	SBP
32	36.6	16.6015	39	62.2	28.2134	25.6	7	11.612	SBP
32	33	14.9685	37	58.6	26.5805	25.6	5	11.612	SBP
32	31.4	14.2428	37	57	25.8548	25.6	5	11.612	SBP
32	27.6	12.5191	37	53.2	24.1311	25.6	5	11.612	SBP
28	26.2	11.8841	33	51.8	23.4961	25.6	5	11.612	SBP
29	25.2	11.4305	35	50.8	23.0425	25.6	6	11.612	ABP
31	27.2	12.3377	36	52.8	23.9497	25.6	5	11.612	SBP
29	40	18.1437	40	65.6	29.7557	25.6	11	11.612	ABP
32	27.2	12.3377	38	52.7	23.9043	25.5	6	11.5666	ABP
32	30	13.6078	36	55.5	25.1744	25.5	4	11.5666	SBP
35	33.6	15.2407	37	59.1	26.8073	25.5	2	11.5666	SBP
32	32.2	14.6057	37	57.7	26.1723	25.5	5	11.5666	SBP
32	33	14.9685	37	58.5	26.5352	25.5	5	11.5666	ABP
30	27.8	12.6099	35	53.3	24.1765	25.5	5	11.5666	SBP
32	27.2	12.3377	35	52.6	23.859	25.4	3	11.5212	SBP
28	26	11.7934	36	51.4	23.3146	25.4	8	11.5212	SBP
28	25.6	11.612	33	51	23.1332	25.4	5	11.5212	SBP
26	21.6	9.7976	35	47	21.3188	25.4	9	11.5212	SBP
31	25	11.3398	35	50.4	22.8611	25.4	4	11.5212	ABP
27	21.6	9.7976	36	47	21.3188	25.4	9	11.5212	ABP
30	28	12.7006	38	53.4	24.2218	25.4	8	11.5212	SBP
35	36.4	16.5108	37	61.8	28.032	25.4	2	11.5212	ABP
31	28.4	12.882	35	53.7	24.3579	25.3	4	11.4759	SBP
31	35.4	16.0572	36	60.7	27.5331	25.3	5	11.4759	SBP
31	25.4	11.5212	36	50.6	22.9518	25.2	5	11.4305	SBP
29	27	12.247	35	52.2	23.6775	25.2	6	11.4305	SBP
31	34	15.4221	37	59.2	26.8527	25.2	6	11.4305	ABP
28	18.4	8.3461	32	43.6	19.7766	25.2	4	11.4305	SBP
28	25	11.3398	35	50.2	22.7703	25.2	7	11.4305	ABP
27	21	9.52544	35	46.2	20.956	25.2	8	11.4305	SBP
28	26.2	11.8841	35	51.4	23.3146	25.2	7	11.4305	SBP
29	23.2	10.5233	31	48.4	21.9539	25.2	2	11.4305	SBP
32	33.6	15.2407	39	58.8	26.6712	25.2	7	11.4305	SBP
27	23.6	10.7048	36	48.8	22.1353	25.2	9	11.4305	ABP
31	29.4	13.3356	36	54.5	24.7208	25.1	5	11.3852	SBP
30	27.4	12.4284	35	52.5	23.8136	25.1	5	11.3852	SBP
29	24.6	11.1584	38	49.7	22.5435	25.1	9	11.3852	SBP
31	30	13.6078	38	55.1	24.9929	25.1	7	11.3852	ABP
31	28.2	12.7913	35	53.3	24.1765	25.1	4	11.3852	SBP
32	26.2	11.8841	36	51.2	23.2239	25	4	11.3398	ABP
28	23	10.4326	37	48	21.7724	25	9	11.3398	SBP
29	26.6	12.0656	38	51.6	23.4054	25	9	11.3398	SBP
26	22.6	10.2512	36	47.6	21.591	25	10	11.3398	ABP
24	16.6	7.52963	31	41.6	18.8694	25	7	11.3398	SBP
32	29.6	13.4263	39	54.6	24.7661	25	7	11.3398	SBP
32	28.6	12.9727	38	53.6	24.3126	25	6	11.3398	ABP
27	21.6	9.7976	35	46.6	21.1374	25	8	11.3398	SBP
26	22.8	10.3419	35	47.8	21.6817	25	9	11.3398	ABP
29	21.8	9.88831	34	46.8	21.2281	25	5	11.3398	SBP
36	40.6	18.4159	40	65.6	29.7557	25	4	11.3398	ABP
34	39.6	17.9623	38	64.6	29.3021	25	4	11.3398	ABP
31	32.8	14.8778	36	57.7	26.1723	24.9	5	11.2945	ABP
30	31.8	14.4242	37	56.7	25.7187	24.9	7	11.2945	SBP
35	30.8	13.9706	36	55.7	25.2651	24.9	1	11.2945	ABP
29	29.4	13.3356	36	54.3	24.6301	24.9	7	11.2945	SBP
37	36	16.3293	38	60.9	27.6238	24.9	1	11.2945	SBP
32	30.6	13.8799	37	55.5	25.1744	24.9	5	11.2945	ABP
28	24.4	11.0677	35	49.2	22.3167	24.8	7	11.2491	SBP
29	25.4	11.5212	35	50.2	22.7703	24.8	6	11.2491	SBP
28	27.8	12.6099	35	52.6	23.859	24.8	7	11.2491	ABP
30	23.8	10.7955	36	48.6	22.0446	24.8	6	11.2491	SBP
28	26.8	12.1563	36	51.6	23.4054	24.8	8	11.2491	ABP
32	29	13.1542	36	53.8	24.4033	24.8	4	11.2491	SBP
31	31	14.0614	41	55.8	25.3105	24.8	10	11.2491	ABP
31	28.4	12.882	36	53.1	24.0858	24.7	5	11.2037	ABP
27	20	9.07185	36	44.7	20.2756	24.7	9	11.2037	ABP
35	34	15.4221	35	58.7	26.6259	24.7	0	11.2037	SBP
31	31	14.0614	37	55.7	25.2651	24.7	6	11.2037	ABP
31	29.8	13.5171	37	54.5	24.7208	24.7	6	11.2037	SBP
31	24.8	11.2491	35	49.5	22.4528	24.7	4	11.2037	SBP
27	21.6	9.7976	35	46.3	21.0013	24.7	8	11.2037	SBP
27	21.6	9.7976	35	46.3	21.0013	24.7	8	11.2037	ABP
35	39.2	17.7808	39	63.9	28.9846	24.7	4	11.2037	ABP
29	26.6	12.0656	35	51.3	23.2693	24.7	6	11.2037	SBP
33	30.4	13.7892	37	55	24.9476	24.6	4	11.1584	SBP
32	34.4	15.6036	34	59	26.7619	24.6	2	11.1584	SBP
29	25.6	11.612	34	50.2	22.7703	24.6	5	11.1584	ABP
35	35	15.8757	39	59.6	27.0341	24.6	4	11.1584	ABP
25	18.4	8.3461	34	43	19.5045	24.6	9	11.1584	ABP
25	20	9.07185	33	44.6	20.2302	24.6	8	11.1584	ABP
32	27.6	12.5191	37	52.2	23.6775	24.6	5	11.1584	ABP
34	32.6	14.7871	37	57.1	25.9001	24.5	3	11.113	SBP
29	23.4	10.6141	37	47.9	21.7271	24.5	8	11.113	ABP
37	37.2	16.8736	38	61.7	27.9866	24.5	1	11.113	ABP
30	26.6	12.0656	36	51.1	23.1786	24.5	6	11.113	SBP
30	23.8	10.7955	35	48.3	21.9085	24.5	5	11.113	ABP
28	24.8	11.2491	36	49.3	22.3621	24.5	8	11.113	ABP
28	27.2	12.3377	35	51.6	23.4054	24.4	7	11.0677	SBP
32	28.2	12.7913	37	52.6	23.859	24.4	5	11.0677	SBP
26	22.2	10.0698	36	46.6	21.1374	24.4	10	11.0677	ABP
32	34.2	15.5129	37	58.6	26.5805	24.4	5	11.0677	ABP
30	26.6	12.0656	37	51	23.1332	24.4	7	11.0677	ABP
32	27.4	12.4284	37	51.8	23.4961	24.4	5	11.0677	SBP
28	24	10.8862	36	48.4	21.9539	24.4	8	11.0677	ABP
28	21.6	9.7976	32	46	20.8652	24.4	4	11.0677	SBP
31	30.6	13.8799	35	55	24.9476	24.4	4	11.0677	ABP
33	29	13.1542	37	53.4	24.2218	24.4	4	11.0677	SBP
29	27.4	12.4284	33	51.7	23.4507	24.3	4	11.0223	ABP
35	35.4	16.0572	40	59.7	27.0795	24.3	5	11.0223	SBP
28	24.8	11.2491	35	49.1	22.2714	24.3	7	11.0223	SBP
28	23.8	10.7955	33	48.1	21.8178	24.3	5	11.0223	ABP
26	23	10.4326	34	47.3	21.4549	24.3	8	11.0223	ABP
27	20.6	9.344	36	44.9	20.3663	24.3	9	11.0223	SBP
32	32.2	14.6057	37	56.5	25.628	24.3	5	11.0223	ABP
35	33	14.9685	38	57.2	25.9455	24.2	3	10.9769	SBP
29	26.2	11.8841	36	50.4	22.8611	24.2	7	10.9769	ABP
29	23.8	10.7955	34	48	21.7724	24.2	5	10.9769	SBP
28	23.8	10.7955	34	48	21.7724	24.2	6	10.9769	SBP
32	25.8	11.7027	36	50	22.6796	24.2	4	10.9769	SBP
34	36.6	16.6015	36	60.8	27.5784	24.2	2	10.9769	SBP
35	34	15.4221	40	58.1	26.3537	24.1	5	10.9316	ABP
32	33.6	15.2407	36	57.7	26.1723	24.1	4	10.9316	ABP
32	31.4	14.2428	36	55.5	25.1744	24.1	4	10.9316	SBP
25	20.6	9.344	33	44.7	20.2756	24.1	8	10.9316	ABP
32	37	16.7829	40	61.1	27.7145	24.1	8	10.9316	ABP
32	34	15.4221	38	58.1	26.3537	24.1	6	10.9316	SBP
30	27	12.247	35	51.1	23.1786	24.1	5	10.9316	SBP
31	30.2	13.6985	35	54.3	24.6301	24.1	4	10.9316	ABP
31	29.2	13.2449	38	53.3	24.1765	24.1	7	10.9316	ABP
29	24.8	11.2491	35	48.9	22.1807	24.1	6	10.9316	ABP
31	29.2	13.2449	38	53.2	24.1311	24	7	10.8862	ABP
30	30	13.6078	36	54	24.494	24	6	10.8862	ABP
35	46	20.8652	38	70	31.7515	24	3	10.8862	ABP
27	24	10.8862	37	48	21.7724	24	10	10.8862	SBP
28	22.6	10.2512	33	46.6	21.1374	24	5	10.8862	SBP
35	34.6	15.6943	36	58.6	26.5805	24	1	10.8862	SBP
26	26.6	12.0656	35	50.6	22.9518	24	9	10.8862	ABP
29	25.6	11.612	38	49.6	22.4982	24	9	10.8862	ABP
32	33.8	15.3314	39	57.8	26.2176	24	7	10.8862	ABP
32	27	12.247	37	51	23.1332	24	5	10.8862	ABP
27	23	10.4326	35	47	21.3188	24	8	10.8862	SBP
26	23.8	10.7955	32	47.8	21.6817	24	6	10.8862	SBP
32	32.8	14.8778	36	56.7	25.7187	23.9	4	10.8409	ABP
28	26.8	12.1563	36	50.7	22.9971	23.9	8	10.8409	SBP
25	19.2	8.70897	35	43.1	19.5498	23.9	10	10.8409	ABP
32	25.8	11.7027	35	49.7	22.5435	23.9	3	10.8409	SBP
33	38.4	17.4179	39	62.3	28.2588	23.9	6	10.8409	SBP
31	32	14.515	38	55.9	25.3558	23.9	7	10.8409	ABP
35	30.4	13.7892	35	54.3	24.6301	23.9	0	10.8409	ABP
35	35.3	16.0118	39	59.1	26.8073	23.8	4	10.7955	ABP
26	23.4	10.6141	35	47.2	21.4096	23.8	9	10.7955	SBP
33	26.2	11.8841	36	50	22.6796	23.8	3	10.7955	SBP
32	30.2	13.6985	37	54	24.494	23.8	5	10.7955	SBP
33	32.2	14.6057	37	56	25.4012	23.8	4	10.7955	ABP
26	23	10.4326	34	46.8	21.2281	23.8	8	10.7955	ABP
35	32.6	14.7871	40	56.4	25.5826	23.8	5	10.7955	ABP
26	18.6	8.43682	34	42.4	19.2323	23.8	8	10.7955	ABP
37	45.8	20.7745	40	69.6	31.57	23.8	3	10.7955	ABP
35	36	16.3293	39	59.8	27.1248	23.8	4	10.7955	SBP
28	24.4	11.0677	35	48.1	21.8178	23.7	7	10.7501	ABP
31	26	11.7934	37	49.7	22.5435	23.7	6	10.7501	ABP
30	29.8	13.5171	35	53.5	24.2672	23.7	5	10.7501	SBP
30	27.8	12.6099	37	51.5	23.36	23.7	7	10.7501	ABP
23	18.6	8.43682	32	42.3	19.187	23.7	9	10.7501	ABP
29	24.6	11.1584	37	48.3	21.9085	23.7	8	10.7501	SBP
35	34.6	15.6943	37	58.3	26.4444	23.7	2	10.7501	SBP
35	34.2	15.5129	39	57.9	26.263	23.7	4	10.7501	ABP
26	21.6	9.7976	35	45.3	20.5477	23.7	9	10.7501	SBP
30	29.4	13.3356	36	53	24.0404	23.6	6	10.7048	SBP
33	34.8	15.785	39	58.4	26.4898	23.6	6	10.7048	SBP
31	28.6	12.9727	38	52.2	23.6775	23.6	7	10.7048	SBP
30	23.4	10.6141	37	47	21.3188	23.6	7	10.7048	ABP
27	26	11.7934	36	49.6	22.4982	23.6	9	10.7048	SBP
27	26.8	12.1563	35	50.4	22.8611	23.6	8	10.7048	SBP
29	24.8	11.2491	38	48.4	21.9539	23.6	9	10.7048	SBP
36	37.2	16.8736	38	60.8	27.5784	23.6	2	10.7048	ABP
30	33.2	15.0593	35	56.8	25.764	23.6	5	10.7048	ABP
30	31.2	14.1521	35	54.7	24.8115	23.5	5	10.6594	ABP
33	36.2	16.42	39	59.7	27.0795	23.5	6	10.6594	ABP
32	32.6	14.7871	37	56.1	25.4465	23.5	5	10.6594	SBP
26	17	7.71107	33	40.5	18.3705	23.5	7	10.6594	SBP
35	38.6	17.5087	38	62.1	28.1681	23.5	3	10.6594	ABP
29	28.4	12.882	35	51.9	23.5414	23.5	6	10.6594	SBP
30	30.6	13.8799	36	54.1	24.5393	23.5	6	10.6594	SBP
33	33.4	15.15	38	56.9	25.8094	23.5	5	10.6594	ABP
28	25.8	11.7027	36	49.3	22.3621	23.5	8	10.6594	SBP
30	25.8	11.7027	32	49.3	22.3621	23.5	2	10.6594	SBP
27	21.8	9.88831	32	45.2	20.5024	23.4	5	10.6141	ABP
32	29.8	13.5171	38	53.2	24.1311	23.4	6	10.6141	ABP
31	29.2	13.2449	36	52.6	23.859	23.4	5	10.6141	SBP
28	25.8	11.7027	35	49.2	22.3167	23.4	7	10.6141	SBP
31	29.2	13.2449	40	52.6	23.859	23.4	9	10.6141	ABP
32	28.2	12.7913	36	51.6	23.4054	23.4	4	10.6141	SBP
33	29.8	13.5171	36	53.2	24.1311	23.4	3	10.6141	SBP
30	32.4	14.6964	35	55.8	25.3105	23.4	5	10.6141	SBP
31	26.6	12.0656	35	50	22.6796	23.4	4	10.6141	ABP
30	27.4	12.4284	35	50.8	23.0425	23.4	5	10.6141	SBP
35	36	16.3293	41	59.4	26.9434	23.4	6	10.6141	ABP
29	27	12.247	35	50.4	22.8611	23.4	6	10.6141	ABP
33	30	13.6078	37	53.4	24.2218	23.4	4	10.6141	ABP
28	21.4	9.70688	35	44.7	20.2756	23.3	7	10.5687	ABP
30	25.4	11.5212	33	48.7	22.0899	23.3	3	10.5687	SBP
27	20.8	9.43472	35	44.1	20.0034	23.3	8	10.5687	SBP
30	31.8	14.4242	36	55.1	24.9929	23.3	6	10.5687	SBP
31	31.2	14.1521	37	54.5	24.7208	23.3	6	10.5687	SBP
32	36.6	16.6015	41	59.9	27.1702	23.3	9	10.5687	ABP
30	31.5	14.2882	35	54.7	24.8115	23.2	5	10.5233	SBP
33	37.4	16.9644	37	60.6	27.4877	23.2	4	10.5233	ABP
27	20	9.07185	37	43.2	19.5952	23.2	10	10.5233	ABP
31	28.9	13.1088	35	52.1	23.6322	23.2	4	10.5233	SBP
26	27.4	12.4284	34	50.6	22.9518	23.2	8	10.5233	SBP
30	25.8	11.7027	35	49	22.226	23.2	5	10.5233	ABP
27	25.8	11.7027	35	49	22.226	23.2	8	10.5233	ABP
30	29.6	13.4263	37	52.8	23.9497	23.2	7	10.5233	ABP
33	36.2	16.42	35	59.4	26.9434	23.2	2	10.5233	SBP
21	26.6	12.0656	37	49.8	22.5889	23.2	16	10.5233	SBP
30	30	13.6078	35	53.1	24.0858	23.1	5	10.478	SBP
32	26.4	11.9748	37	49.5	22.4528	23.1	5	10.478	SBP
33	32	14.515	36	55.1	24.9929	23.1	3	10.478	SBP
25	19	8.61826	35	42.1	19.0962	23.1	10	10.478	SBP
24	19	8.61826	33	42.1	19.0962	23.1	9	10.478	SBP
27	28.8	13.0635	35	51.9	23.5414	23.1	8	10.478	SBP
30	28.2	12.7913	35	51.3	23.2693	23.1	5	10.478	SBP
31	31.2	14.1521	37	54.2	24.5847	23	6	10.4326	ABP
30	28.6	12.9727	35	51.6	23.4054	23	5	10.4326	SBP
26	23	10.4326	35	46	20.8652	23	9	10.4326	SBP
35	31.8	14.4242	37	54.8	24.8569	23	2	10.4326	ABP
32	25.8	11.7027	35	48.8	22.1353	23	3	10.4326	SBP
29	27.8	12.6099	35	50.8	23.0425	23	6	10.4326	SBP
30	31.8	14.4242	35	54.8	24.8569	23	5	10.4326	SBP
31	27.8	12.6099	36	50.7	22.9971	22.9	5	10.3873	SBP
27	21.8	9.88831	35	44.7	20.2756	22.9	8	10.3873	ABP
26	17.8	8.07394	33	40.7	18.4612	22.9	7	10.3873	SBP
29	26.2	11.8841	35	49.1	22.2714	22.9	6	10.3873	SBP
32	29.3	13.2903	35	52.2	23.6775	22.9	3	10.3873	ABP
25	17	7.71107	37	39.9	18.0983	22.9	12	10.3873	ABP
27	23	10.4326	35	45.9	20.8199	22.9	8	10.3873	ABP
28	20.6	9.344	36	43.5	19.7313	22.9	8	10.3873	SBP
34	39.4	17.8715	39	62.3	28.2588	22.9	5	10.3873	SBP
30	31.4	14.2428	37	54.3	24.6301	22.9	7	10.3873	ABP
30	24.4	11.0677	35	47.3	21.4549	22.9	5	10.3873	ABP
26	21.4	9.70688	35	44.3	20.0941	22.9	9	10.3873	ABP
25	19	8.61826	34	41.9	19.0055	22.9	9	10.3873	ABP
24	16.6	7.52963	34	39.5	17.9169	22.9	10	10.3873	SBP
30	24.6	11.1584	33	47.5	21.5456	22.9	3	10.3873	SBP
27	22.4	10.1605	33	45.2	20.5024	22.8	6	10.3419	ABP
26	19.2	8.70897	34	42	19.0509	22.8	8	10.3419	SBP
29	25.2	11.4305	37	48	21.7724	22.8	8	10.3419	SBP
31	26.8	12.1563	36	49.6	22.4982	22.8	5	10.3419	SBP
32	31.2	14.1521	35	54	24.494	22.8	3	10.3419	SBP
27	22.6	10.2512	34	45.4	20.5931	22.8	7	10.3419	SBP
30	29.6	13.4263	36	52.4	23.7682	22.8	6	10.3419	ABP
30	28	12.7006	35	50.8	23.0425	22.8	5	10.3419	ABP
26	18.6	8.43682	34	41.4	18.7787	22.8	8	10.3419	SBP
32	33.4	15.15	35	56.1	25.4465	22.7	3	10.2965	SBP
26	25	11.3398	33	47.7	21.6364	22.7	7	10.2965	SBP
36	37.8	17.1458	40	60.5	27.4423	22.7	4	10.2965	SBP
26	24.4	11.0677	33	47.1	21.3642	22.7	7	10.2965	ABP
30	25.2	11.4305	36	47.9	21.7271	22.7	6	10.2965	SBP
30	25.8	11.7027	36	48.5	21.9992	22.7	6	10.2965	ABP
32	29.8	13.5171	37	52.5	23.8136	22.7	5	10.2965	SBP
30	25.8	11.7027	35	48.5	21.9992	22.7	5	10.2965	SBP
35	36.2	16.42	35	58.9	26.7166	22.7	0	10.2965	SBP
26	15.6	7.07604	34	38.3	17.3726	22.7	8	10.2965	SBP
35	32.4	14.6964	37	55	24.9476	22.6	2	10.2512	ABP
28	25.4	11.5212	34	48	21.7724	22.6	6	10.2512	SBP
28	27.4	12.4284	34	50	22.6796	22.6	6	10.2512	ABP
30	25.6	11.612	36	48.2	21.8632	22.6	6	10.2512	SBP
33	32.8	14.8778	37	55.4	25.129	22.6	4	10.2512	ABP
30	30.4	13.7892	38	53	24.0404	22.6	8	10.2512	ABP
29	27.2	12.3377	33	49.8	22.5889	22.6	4	10.2512	SBP
26	22.2	10.0698	35	44.8	20.3209	22.6	9	10.2512	ABP
31	31.8	14.4242	36	54.4	24.6754	22.6	5	10.2512	ABP
33	20	9.07185	36	42.5	19.2777	22.5	3	10.2058	ABP
33	33.8	15.3314	38	56.3	25.5373	22.5	5	10.2058	SBP
32	29.6	13.4263	35	52.1	23.6322	22.5	3	10.2058	SBP
28	28.4	12.882	35	50.9	23.0879	22.5	7	10.2058	ABP
29	25.8	11.7027	36	48.3	21.9085	22.5	7	10.2058	ABP
31	28.3	12.8367	34	50.8	23.0425	22.5	3	10.2058	ABP
29	27.8	12.6099	34	50.3	22.8157	22.5	5	10.2058	ABP
27	26.8	12.1563	35	49.3	22.3621	22.5	8	10.2058	SBP
33	31.2	14.1521	38	53.6	24.3126	22.4	5	10.1605	SBP
24	15.8	7.16676	31	38.2	17.3272	22.4	7	10.1605	SBP
27	19.6	8.89041	34	42	19.0509	22.4	7	10.1605	SBP
31	31.4	14.2428	37	53.7	24.3579	22.3	6	10.1151	ABP
30	25.8	11.7027	35	48.1	21.8178	22.3	5	10.1151	ABP
30	29.2	13.2449	36	51.5	23.36	22.3	6	10.1151	ABP
29	24.2	10.9769	33	46.5	21.092	22.3	4	10.1151	SBP
30	28.6	12.9727	34	50.9	23.0879	22.3	4	10.1151	ABP
33	30.6	13.8799	39	52.9	23.995	22.3	6	10.1151	SBP
31	27	12.247	34	49.3	22.3621	22.3	3	10.1151	SBP
30	25.6	11.612	35	47.9	21.7271	22.3	5	10.1151	SBP
26	22	9.97903	34	44.3	20.0941	22.3	8	10.1151	ABP
35	32.2	14.6057	35	54.5	24.7208	22.3	0	10.1151	SBP
25	18.6	8.43682	34	40.9	18.5519	22.3	9	10.1151	SBP
30	27.6	12.5191	33	49.9	22.6343	22.3	3	10.1151	ABP
28	26	11.7934	35	48.3	21.9085	22.3	7	10.1151	ABP
35	31	14.0614	38	53.3	24.1765	22.3	3	10.1151	SBP
24	17	7.71107	32	39.2	17.7808	22.2	8	10.0698	ABP
32	33.4	15.15	35	55.6	25.2197	22.2	3	10.0698	SBP
32	34	15.4221	39	56.2	25.4919	22.2	7	10.0698	ABP
36	35.8	16.2386	37	58	26.3084	22.2	1	10.0698	SBP
35	35.8	16.2386	35	58	26.3084	22.2	0	10.0698	SBP
32	28.8	13.0635	38	51	23.1332	22.2	6	10.0698	SBP
28	23.2	10.5233	35	45.4	20.5931	22.2	7	10.0698	ABP
32	30.2	13.6985	33	52.4	23.7682	22.2	1	10.0698	ABP
32	35.2	15.9665	36	57.4	26.0362	22.2	4	10.0698	ABP
30	33.6	15.2407	36	55.8	25.3105	22.2	6	10.0698	ABP
28	24.6	11.1584	34	46.8	21.2281	22.2	6	10.0698	ABP
29	25.4	11.5212	33	47.5	21.5456	22.1	4	10.0244	ABP
33	33.4	15.15	38	55.5	25.1744	22.1	5	10.0244	SBP
29	29.6	13.4263	35	51.7	23.4507	22.1	6	10.0244	ABP
35	33.4	15.15	39	55.5	25.1744	22.1	4	10.0244	SBP
27	24.2	10.9769	34	46.2	20.956	22	7	9.97903	ABP
28	23.2	10.5233	32	45.2	20.5024	22	4	9.97903	ABP
26	26	11.7934	35	48	21.7724	22	9	9.97903	ABP
30	28.6	12.9727	35	50.6	22.9518	22	5	9.97903	ABP
31	29	13.1542	35	51	23.1332	22	4	9.97903	ABP
26	23.6	10.7048	31	45.6	20.6838	22	5	9.97903	SBP
30	24.6	11.1584	34	46.6	21.1374	22	4	9.97903	SBP
23	14.8	6.71317	31	36.8	16.6922	22	8	9.97903	ABP
30	31.8	14.4242	37	53.8	24.4033	22	7	9.97903	SBP
34	32.8	14.8778	35	54.7	24.8115	21.9	1	9.93367	SBP
31	29.8	13.5171	35	51.7	23.4507	21.9	4	9.93367	SBP
26	25.8	11.7027	33	47.7	21.6364	21.9	7	9.93367	SBP
31	27.8	12.6099	37	49.7	22.5435	21.9	6	9.93367	SBP
28	28.4	12.882	35	50.3	22.8157	21.9	7	9.93367	SBP
35	38	17.2365	38	59.9	27.1702	21.9	3	9.93367	SBP
29	28.6	12.9727	35	50.5	22.9064	21.9	6	9.93367	SBP
23	19	8.61826	33	40.9	18.5519	21.9	10	9.93367	ABP
33	33.4	15.15	38	55.3	25.0837	21.9	5	9.93367	ABP
25	21.6	9.7976	33	43.5	19.7313	21.9	8	9.93367	SBP
31	25.4	11.5212	35	47.3	21.4549	21.9	4	9.93367	SBP
35	37.8	17.1458	41	59.6	27.0341	21.8	6	9.88831	ABP
30	30.4	13.7892	35	52.2	23.6775	21.8	5	9.88831	SBP
34	34.8	15.785	36	56.6	25.6733	21.8	2	9.88831	ABP
32	30.4	13.7892	36	52.2	23.6775	21.8	4	9.88831	ABP
31	27.8	12.6099	36	49.6	22.4982	21.8	5	9.88831	SBP
28	21.2	9.61616	34	43	19.5045	21.8	6	9.88831	ABP
27	26.2	11.8841	36	48	21.7724	21.8	9	9.88831	ABP
30	26.8	12.1563	35	48.6	22.0446	21.8	5	9.88831	ABP
27	25.6	11.612	33	47.4	21.5003	21.8	6	9.88831	ABP
36	45	20.4117	38	66.8	30.3	21.8	2	9.88831	ABP
28	24.4	11.0677	34	46.1	20.9106	21.7	6	9.84295	SBP
28	24.4	11.0677	35	46.1	20.9106	21.7	7	9.84295	ABP
26	21	9.52544	31	42.7	19.3684	21.7	5	9.84295	ABP
28	25	11.3398	36	46.7	21.1828	21.7	8	9.84295	ABP
25	16.4	7.43891	32	38.1	17.2819	21.7	7	9.84295	ABP
26	22.8	10.3419	33	44.5	20.1849	21.7	7	9.84295	SBP
29	28.2	12.7913	34	49.9	22.6343	21.7	5	9.84295	SBP
29	27.2	12.3377	35	48.9	22.1807	21.7	6	9.84295	SBP
26	22.6	10.2512	34	44.3	20.0941	21.7	8	9.84295	SBP
33	28.6	12.9727	37	50.3	22.8157	21.7	4	9.84295	ABP
30	28.6	12.9727	35	50.3	22.8157	21.7	5	9.84295	SBP
29	21.6	9.7976	35	43.2	19.5952	21.6	6	9.7976	SBP
30	29.4	13.3356	35	51	23.1332	21.6	5	9.7976	SBP
35	30.6	13.8799	36	52.2	23.6775	21.6	1	9.7976	SBP
25	19	8.61826	31	40.6	18.4159	21.6	6	9.7976	ABP
29	27.2	12.3377	36	48.8	22.1353	21.6	7	9.7976	ABP
30	25.8	11.7027	34	47.4	21.5003	21.6	4	9.7976	ABP
33	30.8	13.9706	38	52.4	23.7682	21.6	5	9.7976	ABP
31	29.2	13.2449	35	50.7	22.9971	21.5	4	9.75224	SBP
26	20.2	9.16257	34	41.7	18.9148	21.5	8	9.75224	ABP
28	28.2	12.7913	36	49.7	22.5435	21.5	8	9.75224	ABP
35	36.2	16.42	38	57.7	26.1723	21.5	3	9.75224	ABP
28	26.6	12.0656	34	48.1	21.8178	21.5	6	9.75224	ABP
28	35.2	15.9665	36	56.7	25.7187	21.5	8	9.75224	ABP
31	29	13.1542	35	50.5	22.9064	21.5	4	9.75224	ABP
28	27	12.247	34	48.5	21.9992	21.5	6	9.75224	ABP
29	27.6	12.5191	35	49.1	22.2714	21.5	6	9.75224	SBP
28	24	10.8862	35	45.4	20.5931	21.4	7	9.70688	ABP
28	23.6	10.7048	34	45	20.4117	21.4	6	9.70688	ABP
28	19.4	8.79969	35	40.8	18.5066	21.4	7	9.70688	ABP
34	33.4	15.15	35	54.8	24.8569	21.4	1	9.70688	SBP
31	32.8	14.8778	37	54.1	24.5393	21.3	6	9.66152	SBP
25	20.4	9.25328	34	41.7	18.9148	21.3	9	9.66152	SBP
26	21.2	9.61616	31	42.5	19.2777	21.3	5	9.66152	SBP
27	22.8	10.3419	33	44.1	20.0034	21.3	6	9.66152	SBP
29	29	13.1542	35	50.3	22.8157	21.3	6	9.66152	ABP
31	25.6	11.612	36	46.9	21.2735	21.3	5	9.66152	ABP
31	27	12.247	35	48.3	21.9085	21.3	4	9.66152	SBP
35	32.6	14.7871	36	53.9	24.4486	21.3	1	9.66152	SBP
29	27	12.247	35	48.2	21.8632	21.2	6	9.61616	ABP
29	30.2	13.6985	35	51.4	23.3146	21.2	6	9.61616	SBP
28	21.8	9.88831	33	43	19.5045	21.2	5	9.61616	ABP
30	31.2	14.1521	36	52.4	23.7682	21.2	6	9.61616	ABP
25	20.6	9.344	34	41.8	18.9602	21.2	9	9.61616	ABP
31	27	12.247	35	48.1	21.8178	21.1	4	9.5708	ABP
33	32.8	14.8778	35	53.9	24.4486	21.1	2	9.5708	SBP
31	29	13.1542	36	50.1	22.725	21.1	5	9.5708	SBP
26	19	8.61826	31	40.1	18.1891	21.1	5	9.5708	SBP
35	30.4	13.7892	35	51.5	23.36	21.1	0	9.5708	ABP
35	29.4	13.3356	37	50.5	22.9064	21.1	2	9.5708	SBP
30	27.4	12.4284	35	48.5	21.9992	21.1	5	9.5708	ABP
27	27.2	12.3377	33	48.3	21.9085	21.1	6	9.5708	SBP
28	24.8	11.2491	35	45.9	20.8199	21.1	7	9.5708	SBP
28	23.8	10.7955	34	44.9	20.3663	21.1	6	9.5708	ABP
29	26.2	11.8841	37	47.3	21.4549	21.1	8	9.5708	ABP
35	35.2	15.9665	38	56.3	25.5373	21.1	3	9.5708	ABP
36	49	22.226	42	70.1	31.7968	21.1	6	9.5708	SBP
31	29.2	13.2449	35	50.2	22.7703	21	4	9.52544	SBP
32	29.2	13.2449	36	50.2	22.7703	21	4	9.52544	SBP
35	33	14.9685	35	54	24.494	21	0	9.52544	SBP
29	28	12.7006	35	49	22.226	21	6	9.52544	ABP
32	33	14.9685	36	54	24.494	21	4	9.52544	SBP
35	37	16.7829	38	58	26.3084	21	3	9.52544	ABP
25	20.8	9.43472	33	41.8	18.9602	21	8	9.52544	SBP
29	25.8	11.7027	33	46.8	21.2281	21	4	9.52544	SBP
32	26.4	11.9748	39	47.3	21.4549	20.9	7	9.48008	SBP
35	35.4	16.0572	36	56.3	25.5373	20.9	1	9.48008	ABP
33	30.6	13.8799	35	51.5	23.36	20.9	2	9.48008	ABP
33	31.6	14.3335	35	52.5	23.8136	20.9	2	9.48008	SBP
27	26.4	11.9748	32	47.3	21.4549	20.9	5	9.48008	ABP
21	12.4	5.62455	31	33.3	15.1046	20.9	10	9.48008	ABP
31	32	14.515	36	52.9	23.995	20.9	5	9.48008	SBP
32	30.4	13.7892	37	51.3	23.2693	20.9	5	9.48008	ABP
30	28	12.7006	36	48.9	22.1807	20.9	6	9.48008	SBP
28	28.2	12.7913	33	49	22.226	20.8	5	9.43472	SBP
24	13.2	5.98742	31	34	15.4221	20.8	7	9.43472	SBP
25	16.2	7.3482	32	37	16.7829	20.8	7	9.43472	SBP
32	28.2	12.7913	36	49	22.226	20.8	4	9.43472	ABP
26	24.6	11.1584	35	45.4	20.5931	20.8	9	9.43472	SBP
34	34	15.4221	39	54.8	24.8569	20.8	5	9.43472	ABP
34	34.2	15.5129	37	55	24.9476	20.8	3	9.43472	SBP
29	28.6	12.9727	33	49.4	22.4075	20.8	4	9.43472	SBP
26	20.6	9.344	34	41.4	18.7787	20.8	8	9.43472	SBP
26	22	9.97903	32	42.8	19.4138	20.8	6	9.43472	SBP
35	38	17.2365	37	58.8	26.6712	20.8	2	9.43472	ABP
25	22	9.97903	33	42.8	19.4138	20.8	8	9.43472	SBP
28	24.6	11.1584	34	45.4	20.5931	20.8	6	9.43472	SBP
35	31	14.0614	35	51.7	23.4507	20.7	0	9.38936	ABP
33	30.4	13.7892	36	51.1	23.1786	20.7	3	9.38936	ABP
33	33.8	15.3314	37	54.5	24.7208	20.7	4	9.38936	SBP
26	21.4	9.70688	32	42.1	19.0962	20.7	6	9.38936	ABP
30	24	10.8862	32	44.7	20.2756	20.7	2	9.38936	SBP
29	23	10.4326	33	43.7	19.822	20.7	4	9.38936	SBP
29	23.2	10.5233	33	43.9	19.9127	20.7	4	9.38936	SBP
32	30.2	13.6985	36	50.9	23.0879	20.7	4	9.38936	SBP
28	23.2	10.5233	34	43.9	19.9127	20.7	6	9.38936	SBP
32	29.8	13.5171	35	50.5	22.9064	20.7	3	9.38936	ABP
33	38.8	17.5994	35	59.4	26.9434	20.6	2	9.344	SBP
29	26	11.7934	35	46.6	21.1374	20.6	6	9.344	ABP
35	34.4	15.6036	38	55	24.9476	20.6	3	9.344	ABP
25	17.8	8.07394	33	38.4	17.4179	20.6	8	9.344	ABP
31	27.8	12.6099	31	48.4	21.9539	20.6	0	9.344	ABP
27	28.2	12.7913	33	48.8	22.1353	20.6	6	9.344	ABP
28	24.2	10.9769	32	44.8	20.3209	20.6	4	9.344	SBP
26	23.2	10.5233	34	43.8	19.8673	20.6	8	9.344	ABP
32	37.9	17.1912	37	58.4	26.4898	20.5	5	9.29864	SBP
35	32.8	14.8778	35	53.3	24.1765	20.5	0	9.29864	ABP
35	34	15.4221	35	54.5	24.7208	20.5	0	9.29864	ABP
33	38	17.2365	40	58.5	26.5352	20.5	7	9.29864	SBP
27	23.4	10.6141	31	43.9	19.9127	20.5	4	9.29864	SBP
35	39.8	18.053	38	60.2	27.3063	20.4	3	9.25328	ABP
26	21	9.52544	33	41.4	18.7787	20.4	7	9.25328	SBP
29	30.6	13.8799	35	51	23.1332	20.4	6	9.25328	SBP
29	32.4	14.6964	33	52.8	23.9497	20.4	4	9.25328	SBP
33	32.4	14.6964	37	52.8	23.9497	20.4	4	9.25328	ABP
26	23.6	10.7048	32	44	19.9581	20.4	6	9.25328	SBP
34	30	13.6078	36	50.4	22.8611	20.4	2	9.25328	SBP
26	22.6	10.2512	35	42.9	19.4591	20.3	9	9.20793	SBP
31	32.4	14.6964	36	52.6	23.859	20.2	5	9.16257	ABP
27	24	10.8862	33	44.2	20.0488	20.2	6	9.16257	ABP
26	23.4	10.6141	33	43.6	19.7766	20.2	7	9.16257	ABP
29	23.2	10.5233	32	43.4	19.6859	20.2	3	9.16257	SBP
30	30.8	13.9706	34	51	23.1332	20.2	4	9.16257	SBP
28	25.8	11.7027	35	46	20.8652	20.2	7	9.16257	SBP
26	20.6	9.344	34	40.7	18.4612	20.1	8	9.11721	SBP
32	33.6	15.2407	35	53.7	24.3579	20.1	3	9.11721	SBP
26	23.4	10.6141	34	43.5	19.7313	20.1	8	9.11721	SBP
30	31	14.0614	37	51.1	23.1786	20.1	7	9.11721	ABP
26	24.4	11.0677	35	44.5	20.1849	20.1	9	9.11721	ABP
30	28.6	12.9727	35	48.7	22.0899	20.1	5	9.11721	SBP
28	25.2	11.4305	34	45.3	20.5477	20.1	6	9.11721	ABP
27	23.2	10.5233	33	43.3	19.6405	20.1	6	9.11721	ABP
25	21.2	9.61616	33	41.3	18.7334	20.1	8	9.11721	SBP
25	17.8	8.07394	31	37.9	17.1912	20.1	6	9.11721	SBP
28	28.2	12.7913	35	48.2	21.8632	20	7	9.07185	ABP
32	30	13.6078	36	50	22.6796	20	4	9.07185	ABP
35	34.4	15.6036	40	54.4	24.6754	20	5	9.07185	ABP
28	27	12.247	34	47	21.3188	20	6	9.07185	SBP
24	15.4	6.98532	32	35.4	16.0572	20	8	9.07185	SBP
30	23.6	10.7048	34	43.6	19.7766	20	4	9.07185	ABP
31	25.8	11.7027	35	45.8	20.7745	20	4	9.07185	SBP
29	25.8	11.7027	36	45.7	20.7292	19.9	7	9.02649	SBP
33	31.2	14.1521	35	51.1	23.1786	19.9	2	9.02649	SBP
23	16.2	7.3482	29	36.1	16.3747	19.9	6	9.02649	SBP
29	24	10.8862	33	43.9	19.9127	19.9	4	9.02649	SBP
30	27.4	12.4284	33	47.3	21.4549	19.9	3	9.02649	ABP
28	20	9.07185	33	39.9	18.0983	19.9	5	9.02649	ABP
27	18.4	8.3461	33	38.2	17.3272	19.8	6	8.98113	ABP
27	24.4	11.0677	35	44.2	20.0488	19.8	8	8.98113	ABP
27	22.2	10.0698	32	42	19.0509	19.8	5	8.98113	SBP
31	27.8	12.6099	35	47.6	21.591	19.8	4	8.98113	ABP
24	15.2	6.8946	30	35	15.8757	19.8	6	8.98113	ABP
31	31.8	14.4242	35	51.6	23.4054	19.8	4	8.98113	SBP
26	27.6	12.5191	33	47.4	21.5003	19.8	7	8.98113	SBP
35	38.6	17.5087	37	58.4	26.4898	19.8	2	8.98113	SBP
30	32	14.515	35	51.8	23.4961	19.8	5	8.98113	SBP
32	34	15.4221	37	53.7	24.3579	19.7	5	8.93577	SBP
30	25	11.3398	35	44.7	20.2756	19.7	5	8.93577	SBP
25	18.4	8.3461	32	38.1	17.2819	19.7	7	8.93577	ABP
32	31	14.0614	33	50.7	22.9971	19.7	1	8.93577	ABP
32	31.8	14.4242	36	51.5	23.36	19.7	4	8.93577	ABP
35	31.2	14.1521	36	50.9	23.0879	19.7	1	8.93577	ABP
33	35	15.8757	36	54.6	24.7661	19.6	3	8.89041	SBP
29	25.6	11.612	33	45.2	20.5024	19.6	4	8.89041	SBP
26	22	9.97903	33	41.6	18.8694	19.6	7	8.89041	SBP
25	22	9.97903	32	41.6	18.8694	19.6	7	8.89041	SBP
33	34.4	15.6036	35	54	24.494	19.6	2	8.89041	ABP
32	31.6	14.3335	35	51.2	23.2239	19.6	3	8.89041	ABP
27	23	10.4326	33	42.6	19.323	19.6	6	8.89041	ABP
27	21	9.52544	33	40.6	18.4159	19.6	6	8.89041	SBP
31	30.8	13.9706	36	50.4	22.8611	19.6	5	8.89041	SBP
27	21.8	9.88831	32	41.4	18.7787	19.6	5	8.89041	ABP
29	23.8	10.7955	32	43.4	19.6859	19.6	3	8.89041	ABP
23	16.2	7.3482	31	35.8	16.2386	19.6	8	8.89041	SBP
29	26.2	11.8841	39	45.8	20.7745	19.6	10	8.89041	ABP
26	20.2	9.16257	32	39.8	18.053	19.6	6	8.89041	SBP
26	22.2	10.0698	31	41.7	18.9148	19.5	5	8.84505	SBP
29	25.2	11.4305	35	44.7	20.2756	19.5	6	8.84505	ABP
28	23.6	10.7048	35	43.1	19.5498	19.5	7	8.84505	ABP
35	32.4	14.6964	35	51.9	23.5414	19.5	0	8.84505	SBP
26	18	8.16466	33	37.5	17.0097	19.5	7	8.84505	ABP
36	36.4	16.5108	39	55.9	25.3558	19.5	3	8.84505	ABP
27	24.4	11.0677	32	43.9	19.9127	19.5	5	8.84505	SBP
31	29.4	13.3356	36	48.9	22.1807	19.5	5	8.84505	ABP
30	29.8	13.5171	34	49.3	22.3621	19.5	4	8.84505	ABP
33	31.8	14.4242	35	51.3	23.2693	19.5	2	8.84505	ABP
30	30.2	13.6985	36	49.6	22.4982	19.4	6	8.79969	SBP
30	30.2	13.6985	34	49.6	22.4982	19.4	4	8.79969	SBP
31	25.2	11.4305	33	44.6	20.2302	19.4	2	8.79969	SBP
29	28.8	13.0635	32	48.2	21.8632	19.4	3	8.79969	SBP
32	32.6	14.7871	35	52	23.5868	19.4	3	8.79969	SBP
26	19.4	8.79969	30	38.7	17.554	19.3	4	8.75433	SBP
26	19.4	8.79969	31	38.7	17.554	19.3	5	8.75433	SBP
33	33.4	15.15	35	52.7	23.9043	19.3	2	8.75433	SBP
31	29.2	13.2449	36	48.5	21.9992	19.3	5	8.75433	SBP
31	29.8	13.5171	35	49.1	22.2714	19.3	4	8.75433	ABP
26	25.2	11.4305	31	44.5	20.1849	19.3	5	8.75433	ABP
28	26.6	12.0656	37	45.9	20.8199	19.3	9	8.75433	SBP
28	22.6	10.2512	30	41.9	19.0055	19.3	2	8.75433	ABP
36	37.6	17.0551	37	56.9	25.8094	19.3	1	8.75433	ABP
28	28	12.7006	31	47.3	21.4549	19.3	3	8.75433	ABP
30	24	10.8862	30	43.2	19.5952	19.2	0	8.70897	SBP
36	34.4	15.6036	37	53.6	24.3126	19.2	1	8.70897	ABP
26	22.4	10.1605	35	41.6	18.8694	19.2	9	8.70897	ABP
26	18.8	8.52754	32	38	17.2365	19.2	6	8.70897	SBP
31	28.2	12.7913	34	47.4	21.5003	19.2	3	8.70897	ABP
29	26.6	12.0656	35	45.8	20.7745	19.2	6	8.70897	SBP
35	35.2	15.9665	35	54.4	24.6754	19.2	0	8.70897	ABP
30	32.2	14.6057	35	51.4	23.3146	19.2	5	8.70897	ABP
29	30.4	13.7892	32	49.5	22.4528	19.1	3	8.66361	SBP
27	25.4	11.5212	32	44.5	20.1849	19.1	5	8.66361	SBP
28	21.4	9.70688	34	40.5	18.3705	19.1	6	8.66361	ABP
29	24.8	11.2491	33	43.9	19.9127	19.1	4	8.66361	SBP
31	30.8	13.9706	34	49.9	22.6343	19.1	3	8.66361	ABP
30	24.8	11.2491	32	43.9	19.9127	19.1	2	8.66361	SBP
30	28.2	12.7913	35	47.3	21.4549	19.1	5	8.66361	SBP
32	33.2	15.0593	36	52.3	23.7229	19.1	4	8.66361	SBP
28	23.2	10.5233	32	42.2	19.1416	19	4	8.61826	ABP
33	33.6	15.2407	34	52.6	23.859	19	1	8.61826	SBP
27	22.4	10.1605	33	41.4	18.7787	19	6	8.61826	SBP
35	37	16.7829	37	56	25.4012	19	2	8.61826	SBP
27	21.8	9.88831	31	40.8	18.5066	19	4	8.61826	ABP
29	32.8	14.8778	35	51.7	23.4507	18.9	6	8.5729	SBP
23	20.2	9.16257	32	39.1	17.7355	18.9	9	8.5729	SBP
29	25.2	11.4305	35	44.1	20.0034	18.9	6	8.5729	ABP
25	21.8	9.88831	34	40.7	18.4612	18.9	9	8.5729	ABP
30	33.4	15.15	36	52.3	23.7229	18.9	6	8.5729	ABP
29	28.6	12.9727	35	47.5	21.5456	18.9	6	8.5729	SBP
27	21.6	9.7976	33	40.5	18.3705	18.9	6	8.5729	SBP
27	20.4	9.25328	31	39.3	17.8262	18.9	4	8.5729	SBP
28	24	10.8862	36	42.9	19.4591	18.9	8	8.5729	ABP
29	26.4	11.9748	35	45.2	20.5024	18.8	6	8.52754	SBP
25	19.3	8.75433	32	38.1	17.2819	18.8	7	8.52754	SBP
26	20.8	9.43472	33	39.6	17.9623	18.8	7	8.52754	ABP
31	29.2	13.2449	35	48	21.7724	18.8	4	8.52754	SBP
33	30	13.6078	35	48.8	22.1353	18.8	2	8.52754	SBP
30	32.2	14.6057	33	51	23.1332	18.8	3	8.52754	SBP
28	23.6	10.7048	33	42.4	19.2323	18.8	5	8.52754	SBP
30	28	12.7006	35	46.8	21.2281	18.8	5	8.52754	ABP
35	39.8	18.053	39	58.5	26.5352	18.7	4	8.48218	SBP
25	24.4	11.0677	31	43.1	19.5498	18.7	6	8.48218	SBP
30	23	10.4326	32	41.7	18.9148	18.7	2	8.48218	ABP
26	21	9.52544	33	39.7	18.0076	18.7	7	8.48218	ABP
27	26.6	12.0656	35	45.3	20.5477	18.7	8	8.48218	ABP
33	34.6	15.6943	35	53.2	24.1311	18.6	2	8.43682	SBP
30	31	14.0614	36	49.6	22.4982	18.6	6	8.43682	ABP
26	20.4	9.25328	33	39	17.6901	18.6	7	8.43682	ABP
32	32	14.515	35	50.6	22.9518	18.6	3	8.43682	ABP
33	31.4	14.2428	35	50	22.6796	18.6	2	8.43682	SBP
31	31.6	14.3335	35	50.2	22.7703	18.6	4	8.43682	SBP
31	25.8	11.7027	35	44.4	20.1395	18.6	4	8.43682	SBP
26	20.2	9.16257	34	38.8	17.5994	18.6	8	8.43682	ABP
30	27.8	12.6099	33	46.4	21.0467	18.6	3	8.43682	ABP
29	23.2	10.5233	30	41.7	18.9148	18.5	1	8.39146	SBP
33	27.4	12.4284	35	45.9	20.8199	18.5	2	8.39146	ABP
27	20.6	9.344	34	39.1	17.7355	18.5	7	8.39146	SBP
30	27	12.247	38	45.5	20.6385	18.5	8	8.39146	ABP
26	22.4	10.1605	32	40.9	18.5519	18.5	6	8.39146	SBP
25	18.4	8.3461	28	36.9	16.7376	18.5	3	8.39146	ABP
32	30.3	13.7438	37	48.8	22.1353	18.5	5	8.39146	ABP
31	32.8	14.8778	35	51.2	23.2239	18.4	4	8.3461	ABP
31	33.8	15.3314	34	52.2	23.6775	18.4	3	8.3461	SBP
33	32.8	14.8778	35	51.2	23.2239	18.4	2	8.3461	ABP
26	23.8	10.7955	32	42.2	19.1416	18.4	6	8.3461	SBP
26	21.2	9.61616	31	39.6	17.9623	18.4	5	8.3461	SBP
26	22.2	10.0698	33	40.6	18.4159	18.4	7	8.3461	ABP
25	23.2	10.5233	31	41.6	18.8694	18.4	6	8.3461	ABP
32	29.4	13.3356	36	47.8	21.6817	18.4	4	8.3461	ABP
29	26.4	11.9748	33	44.8	20.3209	18.4	4	8.3461	ABP
29	25.4	11.5212	32	43.8	19.8673	18.4	3	8.3461	ABP
28	19.2	8.70897	35	37.5	17.0097	18.3	7	8.30074	ABP
31	29.8	13.5171	37	48.1	21.8178	18.3	6	8.30074	ABP
28	23.8	10.7955	33	42.1	19.0962	18.3	5	8.30074	SBP
25	37	16.7829	43	55.3	25.0837	18.3	18	8.30074	ABP
25	18.6	8.43682	30	36.9	16.7376	18.3	5	8.30074	ABP
29	24	10.8862	34	42.2	19.1416	18.2	5	8.25538	ABP
29	28	12.7006	33	46.2	20.956	18.2	4	8.25538	SBP
26	22.4	10.1605	33	40.6	18.4159	18.2	7	8.25538	SBP
28	21.8	9.88831	32	40	18.1437	18.2	4	8.25538	SBP
26	22.2	10.0698	32	40.4	18.3251	18.2	6	8.25538	ABP
30	29.8	13.5171	35	48	21.7724	18.2	5	8.25538	ABP
28	25.2	11.4305	34	43.4	19.6859	18.2	6	8.25538	ABP
35	36.6	16.6015	37	54.8	24.8569	18.2	2	8.25538	SBP
26	22	9.97903	33	40.1	18.1891	18.1	7	8.21002	SBP
27	24	10.8862	31	42.1	19.0962	18.1	4	8.21002	SBP
29	24	10.8862	34	42.1	19.0962	18.1	5	8.21002	SBP
29	26	11.7934	36	44.1	20.0034	18.1	7	8.21002	ABP
29	25.6	11.612	33	43.7	19.822	18.1	4	8.21002	ABP
23	13.8	6.25957	30	31.9	14.4696	18.1	7	8.21002	SBP
31	30.8	13.9706	34	48.9	22.1807	18.1	3	8.21002	SBP
30	31.2	14.1521	33	49.3	22.3621	18.1	3	8.21002	ABP
29	24.8	11.2491	34	42.9	19.4591	18.1	5	8.21002	ABP
26	22.2	10.0698	32	40.2	18.2344	18	6	8.16466	ABP
30	27.2	12.3377	35	45.2	20.5024	18	5	8.16466	SBP
28	22.6	10.2512	31	40.6	18.4159	18	3	8.16466	SBP
28	24	10.8862	34	42	19.0509	18	6	8.16466	ABP
24	17.6	7.98323	33	35.6	16.1479	18	9	8.16466	ABP
26	20.6	9.344	32	38.6	17.5087	18	6	8.16466	SBP
29	28	12.7006	35	46	20.8652	18	6	8.16466	SBP
32	28.8	13.0635	35	46.7	21.1828	17.9	3	8.1193	SBP
31	28.8	13.0635	35	46.7	21.1828	17.9	4	8.1193	ABP
28	24.8	11.2491	33	42.7	19.3684	17.9	5	8.1193	SBP
26	26	11.7934	32	43.9	19.9127	17.9	6	8.1193	SBP
33	24	10.8862	34	41.9	19.0055	17.9	1	8.1193	ABP
23	14.4	6.53173	30	32.3	14.651	17.9	7	8.1193	ABP
30	28.4	12.882	36	46.3	21.0013	17.9	6	8.1193	SBP
27	25.4	11.5212	33	43.2	19.5952	17.8	6	8.07394	SBP
22	15.4	6.98532	31	33.2	15.0593	17.8	9	8.07394	SBP
26	20.2	9.16257	33	38	17.2365	17.8	7	8.07394	SBP
30	27.8	12.6099	34	45.6	20.6838	17.8	4	8.07394	ABP
25	22.2	10.0698	32	40	18.1437	17.8	7	8.07394	ABP
30	31.2	14.1521	35	49	22.226	17.8	5	8.07394	SBP
11	10.2	4.62664	18	28	12.7006	17.8	7	8.07394	SBP
33	30	13.6078	36	47.8	21.6817	17.8	3	8.07394	ABP
30	22	9.97903	35	39.8	18.053	17.8	5	8.07394	SBP
29	28.6	12.9727	36	46.4	21.0467	17.8	7	8.07394	SBP
28	24	10.8862	33	41.8	18.9602	17.8	5	8.07394	ABP
24	15.6	7.07604	30	33.4	15.15	17.8	6	8.07394	SBP
35	37	16.7829	39	54.7	24.8115	17.7	4	8.02858	SBP
27	23.4	10.6141	32	41.1	18.6426	17.7	5	8.02858	ABP
30	26	11.7934	33	43.7	19.822	17.7	3	8.02858	SBP
25	17	7.71107	32	34.7	15.7397	17.7	7	8.02858	ABP
34	35.2	15.9665	40	52.9	23.995	17.7	6	8.02858	SBP
33	33	14.9685	36	50.6	22.9518	17.6	3	7.98323	ABP
31	27	12.247	35	44.6	20.2302	17.6	4	7.98323	ABP
28	26	11.7934	32	43.6	19.7766	17.6	4	7.98323	SBP
26	21.5	9.75224	34	39.1	17.7355	17.6	8	7.98323	ABP
25	18.8	8.52754	32	36.4	16.5108	17.6	7	7.98323	SBP
25	18.8	8.52754	32	36.4	16.5108	17.6	7	7.98323	SBP
24	18.2	8.25538	31	35.7	16.1932	17.5	7	7.93787	SBP
31	31.2	14.1521	33	48.7	22.0899	17.5	2	7.93787	ABP
28	17.2	7.80179	30	34.7	15.7397	17.5	2	7.93787	ABP
24	14.6	6.62245	29	32.1	14.5603	17.5	5	7.93787	SBP
33	28	12.7006	35	45.5	20.6385	17.5	2	7.93787	SBP
33	34.8	15.785	35	52.2	23.6775	17.4	2	7.89251	SBP
26	20.2	9.16257	31	37.6	17.0551	17.4	5	7.89251	SBP
27	23.8	10.7955	33	41.2	18.688	17.4	6	7.89251	SBP
26	22.8	10.3419	31	40.2	18.2344	17.4	5	7.89251	ABP
31	25.8	11.7027	34	43.2	19.5952	17.4	3	7.89251	SBP
30	29.4	13.3356	35	46.8	21.2281	17.4	5	7.89251	ABP
28	26.6	12.0656	35	44	19.9581	17.4	7	7.89251	SBP
31	30.4	13.7892	35	47.7	21.6364	17.3	4	7.84715	SBP
26	20.9	9.48008	31	38.2	17.3272	17.3	5	7.84715	SBP
33	33.8	15.3314	35	51.1	23.1786	17.3	2	7.84715	ABP
26	16.4	7.43891	31	33.7	15.2861	17.3	5	7.84715	ABP
35	35.8	16.2386	35	53.1	24.0858	17.3	0	7.84715	ABP
26	24.8	11.2491	33	42.1	19.0962	17.3	7	7.84715	ABP
28	24.8	11.2491	35	42.1	19.0962	17.3	7	7.84715	SBP
31	29.2	13.2449	35	46.5	21.092	17.3	4	7.84715	ABP
29	22.8	10.3419	35	40.1	18.1891	17.3	6	7.84715	ABP
25	22.8	10.3419	33	40.1	18.1891	17.3	8	7.84715	ABP
26	22.6	10.2512	31	39.9	18.0983	17.3	5	7.84715	SBP
27	20	9.07185	32	37.3	16.919	17.3	5	7.84715	ABP
33	29	13.1542	34	46.3	21.0013	17.3	1	7.84715	SBP
35	38	17.2365	39	55.3	25.0837	17.3	4	7.84715	ABP
28	28	12.7006	33	45.2	20.5024	17.2	5	7.80179	ABP
28	25.2	11.4305	33	42.4	19.2323	17.2	5	7.80179	SBP
26	21.6	9.7976	31	38.8	17.5994	17.2	5	7.80179	ABP
35	36.2	16.42	36	53.4	24.2218	17.2	1	7.80179	ABP
23	16.6	7.52963	30	33.8	15.3314	17.2	7	7.80179	SBP
30	27	12.247	35	44.1	20.0034	17.1	5	7.75643	SBP
27	25.6	11.612	33	42.7	19.3684	17.1	6	7.75643	ABP
27	29.6	13.4263	35	46.6	21.1374	17	8	7.71107	SBP
25	17.4	7.89251	31	34.4	15.6036	17	6	7.71107	SBP
31	32.6	14.7871	36	49.6	22.4982	17	5	7.71107	ABP
33	31	14.0614	35	48	21.7724	17	2	7.71107	SBP
33	34.2	15.5129	35	51.2	23.2239	17	2	7.71107	ABP
24	16.4	7.43891	29	33.4	15.15	17	5	7.71107	ABP
26	20	9.07185	33	37	16.7829	17	7	7.71107	ABP
29	23.8	10.7955	34	40.7	18.4612	16.9	5	7.66571	SBP
29	25.8	11.7027	33	42.7	19.3684	16.9	4	7.66571	ABP
27	20.4	9.25328	31	37.3	16.919	16.9	4	7.66571	ABP
34	34.6	15.6943	40	51.5	23.36	16.9	6	7.66571	ABP
26	31	14.0614	35	47.9	21.7271	16.9	9	7.66571	SBP
26	18.6	8.43682	33	35.5	16.1025	16.9	7	7.66571	ABP
35	34.4	15.6036	35	51.2	23.2239	16.8	0	7.62035	ABP
25	20.2	9.16257	32	37	16.7829	16.8	7	7.62035	ABP
31	29.8	13.5171	35	46.6	21.1374	16.8	4	7.62035	SBP
26	20.2	9.16257	31	37	16.7829	16.8	5	7.62035	SBP
31	29.2	13.2449	37	46	20.8652	16.8	6	7.62035	SBP
31	26.6	12.0656	36	43.4	19.6859	16.8	5	7.62035	ABP
29	22.6	10.2512	30	39.4	17.8715	16.8	1	7.62035	SBP
33	32.4	14.6964	34	49.1	22.2714	16.7	1	7.57499	ABP
35	40	18.1437	38	56.7	25.7187	16.7	3	7.57499	ABP
31	31	14.0614	35	47.7	21.6364	16.7	4	7.57499	SBP
31	25.8	11.7027	35	42.5	19.2777	16.7	4	7.57499	ABP
29	24.6	11.1584	36	41.3	18.7334	16.7	7	7.57499	SBP
26	19.4	8.79969	32	36	16.3293	16.6	6	7.52963	ABP
26	20.6	9.344	33	37.2	16.8736	16.6	7	7.52963	ABP
30	24.4	11.0677	35	41	18.5973	16.6	5	7.52963	ABP
33	34.6	15.6943	35	51.1	23.1786	16.5	2	7.48427	ABP
26	22	9.97903	32	38.5	17.4633	16.5	6	7.48427	SBP
25	17.6	7.98323	29	34.1	15.4675	16.5	4	7.48427	ABP
35	35.2	15.9665	35	51.7	23.4507	16.5	0	7.48427	ABP
31	27.8	12.6099	37	44.3	20.0941	16.5	6	7.48427	ABP
33	32.8	14.8778	36	49.2	22.3167	16.4	3	7.43891	SBP
28	20.8	9.43472	33	37.2	16.8736	16.4	5	7.43891	SBP
26	18.6	8.43682	32	35	15.8757	16.4	6	7.43891	ABP
24	14.6	6.62245	31	31	14.0614	16.4	7	7.43891	SBP
31	27.4	12.4284	36	43.8	19.8673	16.4	5	7.43891	ABP
25	17.6	7.98323	31	34	15.4221	16.4	6	7.43891	SBP
29	24.4	11.0677	35	40.8	18.5066	16.4	6	7.43891	ABP
27	27.4	12.4284	35	43.7	19.822	16.3	8	7.39356	ABP
26	22.4	10.1605	31	38.7	17.554	16.3	5	7.39356	ABP
26	23.2	10.5233	31	39.5	17.9169	16.3	5	7.39356	SBP
30	29.2	13.2449	38	45.5	20.6385	16.3	8	7.39356	SBP
28	23.2	10.5233	32	39.5	17.9169	16.3	4	7.39356	ABP
30	25.8	11.7027	32	42	19.0509	16.2	2	7.3482	SBP
30	27.8	12.6099	31	44	19.9581	16.2	1	7.3482	SBP
28	25.6	11.612	32	41.8	18.9602	16.2	4	7.3482	ABP
26	26.6	12.0656	32	42.8	19.4138	16.2	6	7.3482	SBP
30	31.6	14.3335	32	47.7	21.6364	16.1	2	7.30284	ABP
26	25.4	11.5212	32	41.5	18.8241	16.1	6	7.30284	SBP
30	28.4	12.882	32	44.5	20.1849	16.1	2	7.30284	ABP
26	22	9.97903	33	38.1	17.2819	16.1	7	7.30284	ABP
30	31.2	14.1521	34	47.3	21.4549	16.1	4	7.30284	SBP
26	22.8	10.3419	31	38.9	17.6447	16.1	5	7.30284	SBP
30	25.8	11.7027	34	41.9	19.0055	16.1	4	7.30284	SBP
27	23.2	10.5233	33	39.2	17.7808	16	6	7.25748	SBP
30	29	13.1542	32	45	20.4117	16	2	7.25748	SBP
35	35.4	16.0572	40	51.4	23.3146	16	5	7.25748	ABP
24	33.2	15.0593	33	49.2	22.3167	16	9	7.25748	SBP
33	33.6	15.2407	36	49.6	22.4982	16	3	7.25748	SBP
26	18.4	8.3461	31	34.4	15.6036	16	5	7.25748	SBP
24	18.8	8.52754	32	34.8	15.785	16	8	7.25748	ABP
33	30.8	13.9706	35	46.7	21.1828	15.9	2	7.21212	ABP
30	27.8	12.6099	35	43.7	19.822	15.9	5	7.21212	SBP
24	13.6	6.16886	29	29.5	13.381	15.9	5	7.21212	SBP
30	26	11.7934	35	41.9	19.0055	15.9	5	7.21212	SBP
31	25	11.3398	34	40.9	18.5519	15.9	3	7.21212	ABP
30	29.4	13.3356	33	45.2	20.5024	15.8	3	7.16676	SBP
28	27.4	12.4284	32	43.2	19.5952	15.8	4	7.16676	ABP
28	23.8	10.7955	32	39.6	17.9623	15.8	4	7.16676	ABP
25	20.6	9.344	33	36.4	16.5108	15.8	8	7.16676	ABP
31	32	14.515	35	47.8	21.6817	15.8	4	7.16676	SBP
26	23	10.4326	30	38.8	17.5994	15.8	4	7.16676	ABP
36	37	16.7829	38	52.8	23.9497	15.8	2	7.16676	SBP
28	22.6	10.2512	33	38.4	17.4179	15.8	5	7.16676	ABP
29	28	12.7006	32	43.7	19.822	15.7	3	7.1214	SBP
35	36.8	16.6922	35	52.5	23.8136	15.7	0	7.1214	ABP
28	27	12.247	33	42.7	19.3684	15.7	5	7.1214	SBP
25	23.2	10.5233	31	38.9	17.6447	15.7	6	7.1214	SBP
25	20.2	9.16257	33	35.9	16.284	15.7	8	7.1214	ABP
25	15.8	7.16676	31	31.5	14.2882	15.7	6	7.1214	SBP
23	22.6	10.2512	31	38.2	17.3272	15.6	8	7.07604	SBP
27	24	10.8862	35	39.6	17.9623	15.6	8	7.07604	ABP
27	23	10.4326	33	38.6	17.5087	15.6	6	7.07604	ABP
29	23.4	10.6141	30	39	17.6901	15.6	1	7.07604	ABP
23	16.4	7.43891	29	32	14.515	15.6	6	7.07604	SBP
30	26.6	12.0656	33	42.2	19.1416	15.6	3	7.07604	ABP
30	26.2	11.8841	35	41.8	18.9602	15.6	5	7.07604	SBP
27	26.6	12.0656	31	42.1	19.0962	15.5	4	7.03068	SBP
32	37.4	16.9644	36	52.9	23.995	15.5	4	7.03068	SBP
31	26	11.7934	32	41.5	18.8241	15.5	1	7.03068	SBP
26	19.8	8.98113	30	35.3	16.0118	15.5	4	7.03068	ABP
23	18.8	8.52754	29	34.2	15.5129	15.4	6	6.98532	ABP
26	20.6	9.344	30	36	16.3293	15.4	4	6.98532	SBP
28	22.4	10.1605	32	37.8	17.1458	15.4	4	6.98532	ABP
26	22.4	10.1605	33	37.8	17.1458	15.4	7	6.98532	SBP
29	28.4	12.882	32	43.8	19.8673	15.4	3	6.98532	SBP
27	20.4	9.25328	32	35.8	16.2386	15.4	5	6.98532	ABP
26	21.4	9.70688	32	36.8	16.6922	15.4	6	6.98532	ABP
27	24.4	11.0677	32	39.7	18.0076	15.3	5	6.93996	SBP
26	17.8	8.07394	33	33.1	15.0139	15.3	7	6.93996	ABP
28	26.8	12.1563	32	42.1	19.0962	15.3	4	6.93996	ABP
26	24.2	10.9769	34	39.5	17.9169	15.3	8	6.93996	ABP
32	24.6	11.1584	36	39.9	18.0983	15.3	4	6.93996	ABP
30	26	11.7934	32	41.3	18.7334	15.3	2	6.93996	SBP
30	30.4	13.7892	34	45.6	20.6838	15.2	4	6.8946	ABP
28	27	12.247	35	42.2	19.1416	15.2	7	6.8946	ABP
32	33	14.9685	35	48.2	21.8632	15.2	3	6.8946	SBP
24	14.6	6.62245	28	29.8	13.5171	15.2	4	6.8946	SBP
28	24.8	11.2491	32	40	18.1437	15.2	4	6.8946	SBP
29	28.2	12.7913	31	43.4	19.6859	15.2	2	6.8946	ABP
30	24.2	10.9769	33	39.4	17.8715	15.2	3	6.8946	ABP
28	28.2	12.7913	35	43.4	19.6859	15.2	7	6.8946	SBP
25	22.2	10.0698	31	37.4	16.9644	15.2	6	6.8946	SBP
31	32.2	14.6057	35	47.4	21.5003	15.2	4	6.8946	ABP
24	20.6	9.344	31	35.7	16.1932	15.1	7	6.84924	SBP
29	32	14.515	35	47.1	21.3642	15.1	6	6.84924	ABP
33	32.2	14.6057	35	47.3	21.4549	15.1	2	6.84924	ABP
26	25.2	11.4305	31	40.2	18.2344	15	5	6.80389	SBP
29	25.4	11.5212	32	40.4	18.3251	15	3	6.80389	ABP
31	32.8	14.8778	33	47.8	21.6817	15	2	6.80389	ABP
30	24	10.8862	32	39	17.6901	15	2	6.80389	ABP
32	34	15.4221	36	49	22.226	15	4	6.80389	SBP
30	27.4	12.4284	33	42.4	19.2323	15	3	6.80389	ABP
26	23.3	10.5687	30	38.3	17.3726	15	4	6.80389	ABP
27	26.2	11.8841	35	41.1	18.6426	14.9	8	6.75853	ABP
30	26.2	11.8841	35	41.1	18.6426	14.9	5	6.75853	ABP
28	24.6	11.1584	35	39.5	17.9169	14.9	7	6.75853	SBP
29	29.4	13.3356	33	44.3	20.0941	14.9	4	6.75853	ABP
33	34.2	15.5129	36	49.1	22.2714	14.9	3	6.75853	ABP
29	28	12.7006	32	42.9	19.4591	14.9	3	6.75853	SBP
24	18.4	8.3461	29	33.2	15.0593	14.8	5	6.71317	ABP
23	14	6.35029	29	28.8	13.0635	14.8	6	6.71317	SBP
26	23	10.4326	31	37.7	17.1004	14.7	5	6.66781	SBP
28	26.4	11.9748	33	41.1	18.6426	14.7	5	6.66781	ABP
31	31.2	14.1521	34	45.9	20.8199	14.7	3	6.66781	SBP
29	26.2	11.8841	34	40.9	18.5519	14.7	5	6.66781	SBP
26	22.6	10.2512	31	37.2	16.8736	14.6	5	6.62245	SBP
27	25.2	11.4305	32	39.7	18.0076	14.5	5	6.57709	SBP
29	27.2	12.3377	35	41.7	18.9148	14.5	6	6.57709	ABP
28	22.4	10.1605	29	36.9	16.7376	14.5	1	6.57709	SBP
25	21	9.52544	29	35.5	16.1025	14.5	4	6.57709	SBP
26	22.6	10.2512	30	37	16.7829	14.4	4	6.53173	SBP
25	16.8	7.62035	31	31.2	14.1521	14.4	6	6.53173	ABP
25	20.8	9.43472	31	35.1	15.9211	14.3	6	6.48637	SBP
27	23.2	10.5233	31	37.5	17.0097	14.3	4	6.48637	SBP
26	24	10.8862	30	38.3	17.3726	14.3	4	6.48637	ABP
30	24	10.8862	31	38.2	17.3272	14.2	1	6.44101	SBP
30	28.4	12.882	33	42.6	19.323	14.2	3	6.44101	SBP
26	21.8	9.88831	30	36	16.3293	14.2	4	6.44101	SBP
30	29.6	13.4263	36	43.8	19.8673	14.2	6	6.44101	ABP
30	30.6	13.8799	34	44.7	20.2756	14.1	4	6.39565	ABP
26	22.4	10.1605	32	36.5	16.5561	14.1	6	6.39565	SBP
28	22	9.97903	31	36.1	16.3747	14.1	3	6.39565	SBP
26	21.2	9.61616	31	35.3	16.0118	14.1	5	6.39565	SBP
24	17.8	8.07394	30	31.9	14.4696	14.1	6	6.39565	SBP
26	21.2	9.61616	32	35.3	16.0118	14.1	6	6.39565	SBP
26	21.8	9.88831	33	35.9	16.284	14.1	7	6.39565	SBP
27	20	9.07185	30	34	15.4221	14	3	6.35029	SBP
30	28	12.7006	34	42	19.0509	14	4	6.35029	SBP
30	29.8	13.5171	31	43.8	19.8673	14	1	6.35029	ABP
30	28.6	12.9727	33	42.5	19.2777	13.9	3	6.30493	ABP
31	32.2	14.6057	33	46.1	20.9106	13.9	2	6.30493	SBP
26	20	9.07185	29	33.9	15.3768	13.9	3	6.30493	SBP
30	26.6	12.0656	33	40.5	18.3705	13.9	3	6.30493	ABP
30	24.6	11.1584	32	38.4	17.4179	13.8	2	6.25957	ABP
22	26.6	12.0656	31	40.4	18.3251	13.8	9	6.25957	SBP
26	22.4	10.1605	28	36.1	16.3747	13.7	2	6.21422	SBP
29	22	9.97903	32	35.7	16.1932	13.7	3	6.21422	ABP
29	31.4	14.2428	35	45.1	20.457	13.7	6	6.21422	SBP
28	25.4	11.5212	30	39.1	17.7355	13.7	2	6.21422	ABP
28	23.2	10.5233	30	36.9	16.7376	13.7	2	6.21422	SBP
24	15.8	7.16676	28	29.5	13.381	13.7	4	6.21422	ABP
26	25.6	11.612	30	39.2	17.7808	13.6	4	6.16886	SBP
24	23.4	10.6141	31	37	16.7829	13.6	7	6.16886	SBP
30	28.4	12.882	33	42	19.0509	13.6	3	6.16886	ABP
32	31	14.0614	33	44.6	20.2302	13.6	1	6.16886	SBP
33	27.8	12.6099	35	41.4	18.7787	13.6	2	6.16886	SBP
24	16.8	7.62035	29	30.4	13.7892	13.6	5	6.16886	SBP
32	34	15.4221	35	47.5	21.5456	13.5	3	6.1235	SBP
27	27.4	12.4284	34	40.9	18.5519	13.5	7	6.1235	ABP
26	19.2	8.70897	32	32.6	14.7871	13.4	6	6.07814	SBP
26	21.6	9.7976	33	35	15.8757	13.4	7	6.07814	ABP
28	26.4	11.9748	31	39.8	18.053	13.4	3	6.07814	SBP
27	30	13.6078	33	43.4	19.6859	13.4	6	6.07814	SBP
29	24	10.8862	33	37.4	16.9644	13.4	4	6.07814	SBP
30	27.8	12.6099	31	41.1	18.6426	13.3	1	6.03278	SBP
26	17.6	7.98323	30	30.9	14.016	13.3	4	6.03278	SBP
25	20.6	9.344	30	33.9	15.3768	13.3	5	6.03278	ABP
29	24.4	11.0677	32	37.6	17.0551	13.2	3	5.98742	SBP
29	20.8	9.43472	31	34	15.4221	13.2	2	5.98742	SBP
24	16.8	7.62035	28	30	13.6078	13.2	4	5.98742	SBP
24	18.8	8.52754	33	32	14.515	13.2	9	5.98742	SBP
27	20.4	9.25328	33	33.5	15.1953	13.1	6	5.94206	SBP
25	21.2	9.61616	29	34.3	15.5582	13.1	4	5.94206	SBP
28	20.2	9.16257	32	33.2	15.0593	13	4	5.8967	ABP
26	20.2	9.16257	32	33.2	15.0593	13	6	5.8967	SBP
27	23.2	10.5233	31	36.2	16.42	13	4	5.8967	SBP
30	28.4	12.882	31	41.4	18.7787	13	1	5.8967	SBP
32	33	14.9685	34	46	20.8652	13	2	5.8967	SBP
26	20.4	9.25328	31	33.4	15.15	13	5	5.8967	ABP
27	22.8	10.3419	31	35.8	16.2386	13	4	5.8967	SBP
26	19.6	8.89041	32	32.5	14.7418	12.9	6	5.85134	ABP
23	15.8	7.16676	28	28.7	13.0181	12.9	5	5.85134	SBP
23	18.2	8.25538	29	31	14.0614	12.8	6	5.80598	ABP
25	19	8.61826	31	31.8	14.4242	12.8	6	5.80598	ABP
27	22.8	10.3419	32	35.6	16.1479	12.8	5	5.80598	SBP
27	22.6	10.2512	31	35.4	16.0572	12.8	4	5.80598	SBP
30	25.6	11.612	32	38.4	17.4179	12.8	2	5.80598	ABP
28	28	12.7006	30	40.7	18.4612	12.7	2	5.76062	SBP
25	16	7.25748	29	28.7	13.0181	12.7	4	5.76062	SBP
30	24.8	11.2491	30	37.5	17.0097	12.7	0	5.76062	SBP
26	20.4	9.25328	28	33	14.9685	12.6	2	5.71526	SBP
23	17	7.71107	29	29.6	13.4263	12.6	6	5.71526	SBP
30	26.6	12.0656	31	39.1	17.7355	12.5	1	5.6699	SBP
32	29.6	13.4263	34	42.1	19.0962	12.5	2	5.6699	ABP
26	18	8.16466	30	30.4	13.7892	12.4	4	5.62455	ABP
24	16.4	7.43891	30	28.7	13.0181	12.3	6	5.57919	SBP
31	26	11.7934	32	38.3	17.3726	12.3	1	5.57919	SBP
32	33.8	15.3314	32	46	20.8652	12.2	0	5.53383	ABP
29	25.4	11.5212	33	37.6	17.0551	12.2	4	5.53383	ABP
28	22	9.97903	31	34.2	15.5129	12.2	3	5.53383	SBP
23	27.8	12.6099	30	40	18.1437	12.2	7	5.53383	SBP
26	22.6	10.2512	30	34.8	15.785	12.2	4	5.53383	SBP
29	19.2	8.70897	30	31.3	14.1974	12.1	1	5.48847	ABP
31	26	11.7934	35	38.1	17.2819	12.1	4	5.48847	SBP
24	19	8.61826	28	31	14.0614	12	4	5.44311	SBP
29	26	11.7934	30	38	17.2365	12	1	5.44311	SBP
35	34.4	15.6036	37	46.4	21.0467	12	2	5.44311	ABP
32	31.4	14.2428	32	43.4	19.6859	12	0	5.44311	ABP
25	26.6	12.0656	34	38.5	17.4633	11.9	9	5.39775	ABP
29	24.8	11.2491	31	36.6	16.6015	11.8	2	5.35239	ABP
24	18.4	8.3461	28	30.2	13.6985	11.8	4	5.35239	SBP
29	30.2	13.6985	33	42	19.0509	11.8	4	5.35239	ABP
27	20	9.07185	30	31.8	14.4242	11.8	3	5.35239	ABP
30	26	11.7934	32	37.8	17.1458	11.8	2	5.35239	ABP
28	22.2	10.0698	28	33.9	15.3768	11.7	0	5.30703	SBP
24	18.8	8.52754	29	30.5	13.8346	11.7	5	5.30703	SBP
26	21.1	9.5708	29	32.8	14.8778	11.7	3	5.30703	ABP
31	32.6	14.7871	37	44.2	20.0488	11.6	6	5.26167	ABP
25	21.8	9.88831	30	33.4	15.15	11.6	5	5.26167	SBP
27	23.4	10.6141	29	34.9	15.8304	11.5	2	5.21631	SBP
35	38.4	17.4179	35	49.9	22.6343	11.5	0	5.21631	ABP
26	23.8	10.7955	33	35.3	16.0118	11.5	7	5.21631	ABP
27	24	10.8862	32	35.4	16.0572	11.4	5	5.17095	ABP
23	17.6	7.98323	27	28.9	13.1088	11.3	4	5.12559	SBP
23	30	13.6078	32	41.2	18.688	11.2	9	5.08023	ABP
29	24.4	11.0677	32	35.6	16.1479	11.2	3	5.08023	ABP
25	18.4	8.3461	28	29.6	13.4263	11.2	3	5.08023	SBP
30	30.8	13.9706	33	42	19.0509	11.2	3	5.08023	SBP
24	23.8	10.7955	31	35	15.8757	11.2	7	5.08023	ABP
27	23	10.4326	32	34.1	15.4675	11.1	5	5.03488	ABP
26	22.4	10.1605	31	33.4	15.15	11	5	4.98952	SBP
33	36.4	16.5108	33	47.4	21.5003	11	0	4.98952	ABP
31	29.6	13.4263	32	40.6	18.4159	11	1	4.98952	ABP
29	26.8	12.1563	32	37.7	17.1004	10.9	3	4.94416	SBP
31	36	16.3293	33	46.9	21.2735	10.9	2	4.94416	SBP
30	29.8	13.5171	32	40.6	18.4159	10.8	2	4.8988	SBP
32	30.6	13.8799	36	41.4	18.7787	10.8	4	4.8988	ABP
26	22	9.97903	31	32.8	14.8778	10.8	5	4.8988	ABP
23	15.4	6.98532	28	26.1	11.8388	10.7	5	4.85344	SBP
27	23.4	10.6141	29	34	15.4221	10.6	2	4.80808	ABP
26	34.2	15.5129	34	44.8	20.3209	10.6	8	4.80808	SBP
27	24	10.8862	31	34.5	15.6489	10.5	4	4.76272	SBP
34	35.8	16.2386	35	46.3	21.0013	10.5	1	4.76272	SBP
31	30.4	13.7892	34	40.8	18.5066	10.4	3	4.71736	SBP
29	25.6	11.612	30	36	16.3293	10.4	1	4.71736	ABP
30	30.4	13.7892	34	40.7	18.4612	10.3	4	4.672	SBP
29	20.6	9.344	30	30.9	14.016	10.3	1	4.672	SBP
28	24	10.8862	33	34.3	15.5582	10.3	5	4.672	SBP
20	16.8	7.62035	27	26.9	12.2016	10.1	7	4.58128	ABP
29	23.2	10.5233	30	33.2	15.0593	10	1	4.53592	SBP
29	34.6	15.6943	33	44.6	20.2302	10	4	4.53592	ABP
26	22	9.97903	30	32	14.515	10	4	4.53592	ABP
28	24.8	11.2491	32	34.7	15.7397	9.9	4	4.49056	SBP
26	21.2	9.61616	27	31	14.0614	9.8	1	4.44521	SBP
31	32.6	14.7871	32	42.2	19.1416	9.6	1	4.35449	ABP
33	36.4	16.5108	35	45.7	20.7292	9.3	2	4.21841	ABP
20	26.6	12.0656	29	35.9	16.284	9.3	9	4.21841	SBP
31	36.6	16.6015	34	45.7	20.7292	9.1	3	4.12769	SBP
25	16.8	7.62035	27	25.9	11.748	9.1	2	4.12769	SBP
26	26.8	12.1563	32	35.8	16.2386	9	6	4.08233	SBP
26	23.2	10.5233	30	32.1	14.5603	8.9	4	4.03697	ABP
28	28.4	12.882	34	37.3	16.919	8.9	6	4.03697	ABP
28	25.4	11.5212	33	34.3	15.5582	8.9	5	4.03697	SBP
27	20.4	9.25328	32	29.2	13.2449	8.8	5	3.99161	ABP
25	21.4	9.70688	28	30.2	13.6985	8.8	3	3.99161	ABP
26	19.6	8.89041	30	28.4	12.882	8.8	4	3.99161	SBP
35	39.2	17.7808	39	48	21.7724	8.8	4	3.99161	SBP
26	21	9.52544	30	29.6	13.4263	8.6	4	3.90089	ABP
25	14.6	6.62245	27	23.2	10.5233	8.6	2	3.90089	ABP
28	25.4	11.5212	32	33.9	15.3768	8.5	4	3.85554	ABP
29	24.6	11.1584	30	33	14.9685	8.4	1	3.81018	ABP
28	28.6	12.9727	31	36.9	16.7376	8.3	3	3.76482	SBP
28	25	11.3398	30	33	14.9685	8	2	3.62874	ABP
21	29	13.1542	29	36.6	16.6015	7.6	8	3.4473	ABP
32	31.2	14.1521	37	38.8	17.5994	7.6	5	3.4473	SBP
15	15	6.80389	24	22.4	10.1605	7.4	9	3.35658	SBP
26	27.8	12.6099	31	35.1	15.9211	7.3	5	3.31122	ABP
25	30	13.6078	32	37.3	16.919	7.3	7	3.31122	ABP
23	13.6	6.16886	26	20.6	9.344	7	3	3.17515	ABP
31	32	14.515	33	39	17.6901	7	2	3.17515	ABP
25	24.4	11.0677	30	31.4	14.2428	7	5	3.17515	ABP
32	38.2	17.3272	34	45.1	20.457	6.9	2	3.12979	SBP
23	18.2	8.25538	25	25	11.3398	6.8	2	3.08443	SBP
24	16.8	7.62035	26	23.4	10.6141	6.6	2	2.99371	SBP
34	36.2	16.42	35	42.5	19.2777	6.3	1	2.85763	SBP
27	22.6	10.2512	29	28.6	12.9727	6	2	2.72155	ABP
25	20.4	9.25328	27	26.4	11.9748	6	2	2.72155	ABP
26	21.8	9.88831	26	27.7	12.5645	5.9	0	2.67619	SBP
21	11.6	5.26167	23	17.2	7.80179	5.6	2	2.54012	ABP
28	21	9.52544	28	26.5	12.0202	5.5	0	2.49476	SBP
26	26.2	11.8841	29	31.1	14.1067	4.9	3	2.2226	ABP
31	35.6	16.1479	33	40.3	18.2798	4.7	2	2.13188	SBP
30	34.2	15.5129	35	38.4	17.4179	4.2	5	1.90509	ABP
24	22.8	10.3419	27	26.8	12.1563	4	3	1.81437	SBP
21	10	4.53592	23	13.7	6.21422	3.7	2	1.67829	SBP
26	21.6	9.7976	26	25.2	11.4305	3.6	0	1.63293	SBP
13	14.8	6.71317	15	17.9	8.1193	3.1	2	1.40614	SBP
27	23	10.4326	27	25.8	11.7027	2.8	0	1.27006	ABP
25	19.8	8.98113	25	22.5	10.2058	2.7	0	1.2247	SBP
20	30.2	13.6985	30	32.5	14.7418	2.3	10	1.04326	ABP
25	28	12.7006	29	29.7	13.4717	1.7	4	0.771107	ABP
23	16.4	7.43891	24	18	8.16466	1.6	1	0.725748	SBP
25	23.8	10.7955	27	24.9	11.2945	1.1	2	0.498952	ABP
26	24.8	11.2491	27	25.3	11.4759	0.5	1	0.226796	ABP
35	32.2	14.6057	NA	NA	NA	NA	NA	NA	ABP
27	11.6	5.26167	NA	NA	NA	NA	NA	NA	SBP
30	22.8	10.3419	NA	NA	NA	NA	NA	NA	ABP
18	9.1	4.12769	NA	NA	NA	NA	NA	NA	SBP
22	10.4	4.71736	NA	NA	NA	NA	NA	NA	SBP
26	22	9.97903	NA	NA	NA	NA	NA	NA	SBP
29	21.2	9.61616	NA	NA	NA	NA	NA	NA	SBP
32	29	13.1542	NA	NA	NA	NA	NA	NA	SBP
34	28.2	12.7913	NA	NA	NA	NA	NA	NA	SBP
31	29.8	13.5171	NA	NA	NA	NA	NA	NA	ABP
30	28.8	13.0635	NA	NA	NA	NA	NA	NA	ABP
29	25.4	11.5212	NA	NA	NA	NA	NA	NA	ABP
26	24.4	11.0677	NA	NA	NA	NA	NA	NA	SBP
26	24.4	11.0677	NA	NA	NA	NA	NA	NA	SBP
30	26.8	12.1563	NA	NA	NA	NA	NA	NA	SBP
33	32.8	14.8778	NA	NA	NA	NA	NA	NA	SBP
24	18.4	8.3461	NA	NA	NA	NA	NA	NA	SBP
26	26.4	11.9748	NA	NA	NA	NA	NA	NA	SBP
30	33.8	15.3314	NA	NA	NA	NA	NA	NA	SBP
29	27.2	12.3377	NA	NA	NA	NA	NA	NA	SBP
26	21.6	9.7976	NA	NA	NA	NA	NA	NA	SBP
24	18.8	8.52754	NA	NA	NA	NA	NA	NA	SBP
26	22.2	10.0698	NA	NA	NA	NA	NA	NA	SBP
26	24.6	11.1584	NA	NA	NA	NA	NA	NA	SBP
25	18.8	8.52754	NA	NA	NA	NA	NA	NA	SBP
32	30.2	13.6985	NA	NA	NA	NA	NA	NA	ABP
32	30.8	13.9706	NA	NA	NA	NA	NA	NA	ABP
29	25	11.3398	NA	NA	NA	NA	NA	NA	ABP
31	25.6	11.612	NA	NA	NA	NA	NA	NA	ABP
29	27	12.247	NA	NA	NA	NA	NA	NA	ABP
29	27	12.247	NA	NA	NA	NA	NA	NA	SBP
26	20.6	9.344	NA	NA	NA	NA	NA	NA	ABP
35	37	16.7829	NA	NA	NA	NA	NA	NA	ABP
30	29	13.1542	NA	NA	NA	NA	NA	NA	ABP
35	37	16.7829	NA	NA	NA	NA	NA	NA	SBP
27	22	9.97903	NA	NA	NA	NA	NA	NA	SBP
30	28.4	12.882	NA	NA	NA	NA	NA	NA	SBP
31	30.4	13.7892	NA	NA	NA	NA	NA	NA	SBP
29	26.6	12.0656	NA	NA	NA	NA	NA	NA	SBP
28	27.6	12.5191	NA	NA	NA	NA	NA	NA	SBP
25	18.2	8.25538	NA	NA	NA	NA	NA	NA	SBP
28	24.4	11.0677	NA	NA	NA	NA	NA	NA	SBP
30	30	13.6078	NA	NA	NA	NA	NA	NA	SBP
27	21.8	9.88831	NA	NA	NA	NA	NA	NA	SBP
25	18	8.16466	NA	NA	NA	NA	NA	NA	SBP
30	25.6	11.612	NA	NA	NA	NA	NA	NA	ABP

## Sheet: Processed
Grade	Defects	Feed
3	Bite Mark	ABP
3	Brown Spot	ABP
3	Bite Mark	ABP
1	None	ABP
1	None	SBP
1	None	ABP
3	Bite Mark	ABP
1	None	ABP
1	None	SBP
1	None	ABP
1	None	SBP
1	None	ABP
1	None	SBP
1	None	SBP
1	None	ABP
1	None	SBP
1	None	SBP
1	None	ABP
1	None	SBP
2	Scar on Belly	SBP
1	None	SBP
2	Scar on Belly	SBP
2	Scar on Belly	SBP
1	None	SBP
3	Brown Spot	ABP
1	None	ABP
2	Scar on Belly	SBP
1	None	ABP
1	None	SBP
1	None	ABP
3	Bite Mark	SBP
3	Brown Spot	ABP
3	Bite Mark	SBP
1	None	ABP
1	None	ABP
1	None	ABP
1	None	ABP
3	Brown Spot	SBP
1	None	ABP
1	None	SBP
1	None	SBP
1	None	SBP
1	None	ABP
1	None	SBP
1	None	SBP
1	None	SBP
1	None	ABP
1	None	SBP
1	None	SBP
1	None	ABP
1	None	ABP
1	None	SBP
1	None	SBP
1	None	ABP
3	Bite Mark	ABP
1	None	ABP
3	Bite Mark	SBP
1	None	ABP
1	None	ABP
3	Brown Spot	SBP
1	None	SBP
1	None	SBP
1	None	ABP
1	None	SBP
1	None	SBP
1	None	ABP
3	Brown Spot	SBP
1	None	ABP
1	None	SBP
1	None	SBP
2	Scar on Belly	SBP
1	None	ABP
1	None	SBP
3	Bite Mark	ABP
1	None	ABP
1	None	ABP
3	Bite Mark	SBP
3	Bite Mark	SBP
1	None	SBP
1	None	ABP
1	None	SBP
1	None	ABP
1	None	SBP
1	None	ABP
1	None	ABP
1	None	SBP
1	None	SBP
2	Scar on Belly	ABP
1	None	ABP
3	Bite Mark	SBP
3	Bite Mark	ABP
1	None	ABP
1	None	ABP
1	None	SBP
1	None	SBP
3	Brown Spot	ABP
1	None	SBP
1	None	SBP
1	None	SBP
1	None	ABP
1	None	ABP
1	None	SBP
1	None	ABP
3	Brown Spot	SBP
3	Brown Spot	ABP
1	None	SBP
1	None	ABP
1	None	ABP
3	Bite Mark	SBP
1	None	ABP
1	None	ABP
1	None	ABP
3	Brown Spot	ABP
1	None	ABP
1	None	SBP
1	None	ABP
1	None	SBP
1	None	ABP
1	None	SBP
1	None	ABP
1	None	SBP
1	None	SBP
1	None	ABP
1	None	SBP
2	Scar on Belly	ABP
1	None	ABP
1	None	SBP
1	None	SBP
3	Bite Mark	SBP
1	None	ABP
1	None	ABP
1	None	SBP
3	Brown Spot	SBP
1	None	ABP
1	None	ABP
1	None	SBP
1	None	ABP
1	None	ABP
1	None	SBP
2	Scar on Belly	SBP
3	Bite Mark	ABP
1	None	ABP
1	None	ABP
1	None	SBP
1	None	SBP
1	None	ABP
3	Bite Mark	ABP
1	None	ABP
1	None	SBP
1	None	ABP
1	None	ABP
1	None	ABP
1	None	SBP
1	None	ABP
3	Bite Mark	ABP
1	None	ABP
2	Scar on Belly	SBP
3	Bite Mark	ABP
1	None	SBP
1	None	SBP
1	None	SBP
1	None	SBP
1	None	SBP
1	None	SBP
1	None	SBP
1	None	ABP
1	None	SBP
3	Brown Spot	SBP
1	None	ABP
3	Bite Mark	ABP
1	None	SBP
1	None	SBP
3	Bite Mark	SBP
2	Scar on Belly	ABP
1	None	SBP
1	None	SBP
3	Bite Mark	ABP
1	None	ABP
1	None	ABP
1	None	ABP
1	None	SBP
3	Brown Spot	SBP
3	Brown Spot	ABP
1	None	SBP
1	None	ABP
1	None	SBP
1	None	SBP
1	None	SBP
1	None	SBP
2	Scar on Belly	SBP
1	None	SBP
3	Bite Mark	ABP
1	None	SBP
1	None	ABP
1	None	SBP
2	Scar on Belly	SBP
1	None	SBP
1	None	SBP
1	None	SBP
3	Bite Mark	SBP
1	None	ABP
1	None	SBP
3	Bite Mark	ABP
1	None	SBP
1	None	SBP
1	None	ABP
3	Bite Mark	ABP
1	None	SBP
1	None	SBP
1	None	SBP
1	None	SBP
1	None	ABP
1	None	SBP
1	None	ABP
1	None	SBP
1	None	SBP
3	Bite Mark	ABP
1	None	ABP
1	None	SBP
3	Bite Mark	SBP
3	Bite Mark	SBP
2	Scar on Belly	ABP
1	None	SBP
3	Bite Mark	SBP
1	None	ABP
2	Scar on Belly	ABP
1	None	ABP
1	None	ABP
2	Scar on Belly	SBP
1	None	ABP
1	None	SBP
1	None	ABP
1	None	SBP
1	None	ABP
1	None	ABP
1	None	SBP
3	Bite Mark	SBP
1	None	ABP
1	None	ABP
1	None	ABP
1	None	ABP
3	Bite Mark	ABP
1	None	SBP
1	None	ABP
2	Scar on Belly	ABP
3	Bite Mark	ABP
1	None	ABP
1	None	SBP
3	Brown Spot	SBP
3	Brown Spot	SBP
1	None	ABP
1	None	ABP
3	Brown Spot	SBP
2	Scar on Belly	ABP
1	None	SBP
1	None	ABP
1	None	ABP
1	None	SBP
2	Scar on Belly	SBP
2	Scar on Belly	SBP
1	None	ABP
3	Bite Mark	ABP
1	None	SBP
1	None	ABP
2	Scar on Belly	ABP
1	None	ABP
2	Scar on Belly	ABP
1	None	ABP
1	None	ABP
1	None	ABP
3	Brown Spot	SBP
1	None	ABP
1	None	ABP
1	None	SBP
1	None	SBP
3	Brown Spot	ABP
1	None	ABP
1	None	SBP
2	Scar on Belly	SBP
1	None	SBP
1	None	SBP
1	None	ABP
1	None	SBP
1	None	ABP
2	Scar on Belly	SBP
3	Bite Mark	SBP
3	Brown Spot	SBP
2	Scar on Belly	SBP
3	Brown Spot	SBP
1	None	ABP
1	None	SBP
1	None	SBP
1	None	ABP
1	None	SBP
3	Bite Mark	SBP
1	None	SBP
2	Scar on Belly	SBP
1	None	SBP
3	Bite Mark	SBP
1	None	SBP
1	None	ABP
1	None	ABP
3	Bite Mark	SBP
1	None	SBP
1	None	ABP
3	Bite Mark	ABP
1	None	SBP
3	Brown Spot	ABP
1	None	ABP
1	None	SBP
3	Bite Mark	SBP
1	None	ABP
1	None	ABP
1	None	SBP
3	Bite Mark	SBP
1	None	ABP
1	None	SBP
3	Bite Mark	SBP
1	None	SBP
1	None	SBP
1	None	SBP
1	None	ABP
1	None	ABP
1	None	SBP
1	None	ABP
3	Bite Mark	ABP
1	None	ABP
1	None	SBP
3	Brown Spot	SBP
1	None	SBP
1	None	SBP
1	None	SBP
1	None	SBP
1	None	ABP
1	None	SBP
1	None	SBP
3	Bite Mark	SBP
1	None	SBP
1	None	ABP
1	None	ABP
1	None	ABP
1	None	SBP
3	Bite Mark	SBP
1	None	ABP
1	None	SBP
1	None	SBP
1	None	SBP
1	None	SBP
1	None	ABP
3	Bite Mark	ABP
1	None	SBP
1	None	ABP
1	None	ABP
1	None	SBP
1	None	ABP
1	None	ABP
1	None	SBP
1	None	SBP
3	Bite Mark	ABP
1	None	SBP
1	None	ABP
3	Bite Mark	ABP
1	None	SBP
1	None	ABP
1	None	ABP
3	Brown Spot	SBP
3	Bite Mark	SBP
1	None	SBP
1	None	ABP
1	None	SBP
1	None	ABP
3	Brown Spot	ABP
1	None	SBP
1	None	SBP
3	Bite Mark	ABP
1	None	ABP
1	None	SBP
1	None	ABP
1	None	SBP
1	None	ABP
1	None	SBP
2	Scar on Belly	ABP
1	None	ABP
3	Bite Mark	ABP
3	Bite Mark	SBP
3	Bite Mark	ABP
1	None	SBP
1	None	ABP
1	None	ABP
3	Brown Spot	ABP
3	Bite Mark	ABP
1	None	ABP
1	None	ABP
1	None	SBP
3	Brown Spot	SBP
1	None	SBP
1	None	SBP
1	None	ABP
2	Scar on Belly	SBP
1	None	SBP
3	Bite Mark	SBP
1	None	SBP
1	None	SBP
2	Scar on Belly	ABP
1	None	ABP
3	Brown Spot	SBP
3	Bite Mark	SBP
1	None	ABP
1	None	SBP
1	None	SBP
2	Scar on Belly	ABP
1	None	SBP
1	None	SBP
3	Bite Mark	SBP
1	None	SBP
3	Bite Mark	SBP
1	None	SBP
1	None	ABP
1	None	SBP
1	None	ABP
1	None	ABP
1	None	ABP
1	None	SBP
1	None	ABP
3	Bite Mark	SBP
1	None	SBP
1	None	ABP
1	None	ABP
3	Bite Mark	SBP
1	None	SBP
1	None	SBP
2	Scar on Belly	ABP
1	None	ABP
1	None	SBP
1	None	ABP
2	Scar on Belly	SBP
1	None	SBP
1	None	ABP
3	Bite Mark	SBP
1	None	ABP
1	None	SBP
3	Brown Spot	ABP
1	None	ABP
1	None	SBP
1	None	SBP
3	Bite Mark	ABP
3	Bite Mark	ABP
1	None	ABP
3	Brown Spot	SBP
1	None	SBP
1	None	SBP
2	Scar on Belly	ABP
1	None	SBP
1	None	ABP
1	None	SBP
1	None	SBP
1	None	SBP
3	Bite Mark	ABP
1	None	ABP
1	None	ABP
1	None	SBP
1	None	ABP
1	None	ABP
1	None	SBP
1	None	SBP
1	None	SBP
1	None	SBP
2	Scar on Belly	SBP
3	Bite Mark	SBP
1	None	SBP
1	None	SBP
1	None	SBP
3	Bite Mark	SBP
1	None	SBP
1	None	SBP
1	None	SBP
1	None	ABP
1	None	SBP
1	None	SBP
2	Scar on Belly	SBP
1	None	SBP
1	None	SBP
1	None	SBP
2	Scar on Belly	SBP
3	Bite Mark	SBP
1	None	SBP
1	None	ABP
1	None	ABP
1	None	ABP
3	Brown Spot	SBP
1	None	ABP
1	None	ABP
1	None	ABP
1	None	SBP
1	None	SBP
3	Bite Mark	ABP
1	None	ABP
1	None	ABP
1	None	SBP
1	None	SBP
1	None	SBP
1	None	ABP
3	Brown Spot	SBP
2	Scar on Belly	SBP
3	Bite Mark	ABP
1	None	ABP
1	None	SBP
3	Bite Mark	ABP
1	None	ABP
1	None	SBP
2	Scar on Belly	ABP
1	None	SBP
1	None	ABP
1	None	SBP
1	None	SBP
1	None	ABP
1	None	SBP
3	Brown Spot	ABP
1	None	SBP
1	None	SBP
1	None	ABP
2	Scar on Belly	SBP
3	None	SBP
3	Bite Mark	SBP
1	None	ABP
3	Bite Mark	SBP
3	Bite Mark	SBP
1	None	SBP
1	None	ABP
3	Bite Mark	ABP
1	None	SBP
3	Bite Mark	SBP
1	None	SBP
3	Bite Mark	SBP
3	Brown Spot	ABP
1	None	SBP
1	None	ABP
3	Bite Mark	ABP
1	None	SBP
1	None	SBP
3	Bite Mark	ABP
1	None	SBP
3	Brown Spot	SBP
3	Brown Spot	SBP
3	Bite Mark	ABP
1	None	ABP
2	Scar on Belly	SBP
3	Bite Mark	ABP
1	None	SBP
1	None	SBP
3	Brown Spot	SBP
1	None	ABP
1	None	SBP
1	None	ABP
1	None	SBP
1	None	SBP
1	None	SBP
3	Bite Mark	SBP
1	None	SBP
3	Bite Mark	SBP
1	None	SBP
1	None	SBP
3	Brown Spot	ABP
1	None	SBP
3	Brown Spot	ABP
1	None	SBP
3	Brown Spot	ABP
1	None	ABP
1	None	SBP
1	None	SBP
3	Bite Mark	ABP
1	None	SBP
1	None	SBP
3	Bite Mark	ABP
3	Brown Spot	SBP
1	None	ABP
1	None	ABP
1	None	SBP
1	None	ABP
1	None	SBP
2	Scar on Belly	SBP
1	None	ABP
3	Brown Spot	ABP
1	None	SBP
1	None	SBP
1	None	SBP
1	None	ABP
1	None	ABP
2	Scar on Belly	ABP
1	None	ABP
1	None	ABP
3	Bite Mark	SBP
1	None	ABP
1	None	ABP
2	Scar on Belly	SBP
1	None	ABP
1	None	SBP
1	None	SBP
3	Brown Spot	ABP
3	Bite Mark	ABP
1	None	SBP
3	Brown Spot	ABP
1	None	SBP
3	Brown Spot	ABP
1	None	SBP
3	Bite Mark Flank	ABP
1	None	SBP
1	None	SBP
3	Bite Mark	ABP
1	None	ABP
3	Brown Spot	SBP
3	Bite Mark	ABP
1	None	SBP
1	None	SBP
1	None	SBP
3	Brown Spot	ABP
3	Bite Mark	SBP
1	None	ABP
1	None	ABP
2	Scar on Belly	SBP
1	None	SBP
1	None	ABP
1	None	ABP
1	None	ABP
1	None	ABP
3	Bite Mark	SBP
3	Bite Mark	SBP
3	Bite Mark	SBP
1	None	SBP
3	Bite Mark	ABP
1	None	ABP
1	None	ABP
1	None	ABP
1	None	SBP
1	None	SBP
1	None	ABP
2	Scar on Belly	SBP
1	None	ABP
1	None	SBP
2	Scar on Belly	ABP
1	None	ABP
1	None	SBP
2	Scar on Belly	SBP
3	Bite Mark	ABP
3	Brown Spot	ABP
1	None	ABP
1	None	SBP
3	Bite Mark	ABP
3	Brown Spot	ABP
1	None	SBP
1	None	ABP
2	Scar on Belly	ABP
1	None	SBP
2	Scar on Belly	SBP
1	None	ABP
3	Bite Mark	SBP
1	None	SBP
1	None	SBP
2	Scar on Belly	SBP
1	None	SBP
1	None	SBP
1	None	ABP
1	None	ABP
1	None	ABP
1	None	ABP
1	None	ABP
1	None	ABP
1	None	ABP
1	None	ABP
1	None	SBP
1	None	ABP
1	None	SBP
1	None	SBP
1	None	SBP
2	Scar on Belly	ABP
2	Scar on Belly	SBP
1	None	SBP
1	None	ABP
1	None	SBP
1	None	SBP
1	None	SBP
1	None	SBP
1	None	ABP
1	None	ABP
1	None	SBP
3	Bite Mark	SBP
3	Brown Spot	ABP
1	None	SBP
1	None	ABP
1	None	SBP
1	None	ABP
1	None	ABP
3	Brown Spot	SBP
3	Bite Mark	SBP
3	Brown Spot	SBP
3	Bite Mark	SBP
1	None	SBP
1	None	SBP
1	None	SBP
1	None	SBP
3	Bite Mark	ABP
1	None	SBP
1	None	ABP
1	None	SBP
1	None	SBP
1	None	SBP
1	None	SBP
1	None	SBP
2	Scar on Belly	ABP
1	None	SBP
1	None	SBP
1	None	ABP
1	None	ABP
3	Bite Mark	ABP
1	None	SBP
3	Bite Mark	ABP
1	None	ABP
3	Bite Mark	ABP
1	None	ABP
1	None	ABP
1	None	ABP
3	Bite Mark Flank	SBP
1	None	SBP
3	Bite Mark	SBP
3	Bite Mark	SBP
1	None	SBP
3	Bite Mark	SBP
1	None	ABP
1	None	SBP
1	None	SBP
1	None	SBP
1	None	SBP
1	None	ABP
1	None	SBP
1	None	ABP
1	None	SBP
1	None	SBP
1	None	SBP
3	Bite Mark	SBP
3	Bite Mark	ABP
3	Bite Mark	SBP
1	None	ABP
3	Bite Mark	ABP
3	Bite Mark	SBP
1	None	ABP
3	Bite Mark	ABP
1	None	ABP
1	None	SBP
1	None	SBP
1	None	ABP
1	None	ABP
1	None	ABP
1	None	ABP
1	None	ABP
1	None	SBP
1	None	SBP
1	None	ABP
1	None	ABP
2	Scar on Belly	ABP
1	None	SBP
1	None	SBP
3	Bite Mark	SBP
1	None	ABP
3	Brown Spot	SBP
3	Bite Mark	ABP
3	Brown Spot	ABP
1	None	SBP
1	None	ABP
1	None	SBP
3	Bite Mark	ABP
1	None	SBP
1	None	SBP
3	Bite Mark	ABP
1	None	ABP
1	None	ABP
1	None	ABP
1	None	ABP
1	None	SBP
1	None	ABP
1	None	ABP
1	None	ABP
1	None	ABP
1	None	SBP
3	Bite Mark	SBP
1	None	ABP
1	None	SBP
1	None	SBP
2	Scar on Belly	SBP
3	Bite Mark	SBP
3	Brown Spot	SBP
1	None	SBP
2	Scar on Belly	SBP
3	Bite Mark	ABP
3	Bite Mark	SBP
1	None	SBP
2	Scar on Belly	SBP
1	None	ABP
1	None	ABP
1	None	SBP
1	None	ABP
3	Bite Mark	ABP
1	None	SBP
1	None	SBP
1	None	SBP
1	None	ABP
1	None	SBP
3	Bite Mark	SBP
3	Bite Mark	SBP
1	None	SBP
3	Bite Mark	ABP
1	None	ABP
1	None	SBP
1	None	ABP
3	Bite Mark	ABP
1	None	ABP
3	Bite Mark	ABP
1	None	ABP
1	None	ABP
2	Scar on Belly	ABP
1	None	SBP
3	Brown Spot	ABP
1	None	ABP
1	None	ABP
1	None	SBP
1	None	SBP
1	None	SBP
2	Scar on Belly	ABP
3	Bite Mark	ABP
1	None	SBP
1	None	SBP
1	None	ABP
1	None	SBP
1	None	ABP
3	Bite Mark	ABP
1	None	SBP
1	None	SBP
1	None	SBP
3	Brown Spot	ABP
1	None	SBP
2	Scar on Belly	SBP
3	Bite Mark	ABP
1	None	ABP
3	Brown Spot	SBP
1	None	SBP
1	None	SBP
3	Bite Mark	ABP
1	None	SBP
1	None	ABP
2	Scar on Belly	SBP
1	None	SBP
2	Scar on Belly	SBP
1	None	ABP
1	None	ABP
1	None	SBP
1	None	ABP
3	Brown Spot	SBP
1	None	ABP
1	None	SBP
1	None	SBP
1	None	SBP
3	Bite Mark	ABP
2	Scar on Belly	SBP
3	Bite Mark	ABP
1	None	SBP
1	None	SBP
1	None	SBP
2	Scar on Belly	SBP
1	None	ABP
1	None	SBP
1	None	ABP
3	Brown Spot	SBP
1	None	ABP
1	None	SBP
1	None	SBP
1	None	SBP
1	None	SBP
3	Brown Spot	SBP
1	None	ABP
3	Bite Mark	ABP
1	None	ABP
1	None	ABP
1	None	ABP
1	None	ABP
1	None	SBP
1	None	ABP
1	None	ABP
1	None	SBP
1	None	SBP
1	None	ABP
3	Bite Mark	SBP
1	None	SBP
1	None	ABP
3	Bite Mark	SBP
3	Bite Mark	SBP
1	None	ABP
2	Scar on Belly	ABP
1	None	ABP
1	None	SBP
3	Bite Mark	SBP
2	Scar on Belly	SBP
2	Scar on Belly	SBP
1	None	SBP
1	None	SBP
1	None	ABP
1	None	ABP
1	None	SBP
1	None	ABP
1	None	ABP
1	None	SBP
1	None	ABP
1	None	SBP
1	None	SBP
1	None	ABP
1	None	SBP
1	None	SBP
1	None	SBP
3	Bite Mark	SBP
1	None	ABP
1	None	ABP
3	Bite Mark	ABP
1	None	SBP
1	None	ABP
2	Scar on Belly	SBP
1	None	SBP
1	None	ABP
1	None	ABP
1	None	ABP
3	Bite Mark	SBP
3	Bite Mark	SBP
3	Bite Mark	SBP
1	None	ABP
1	None	SBP
1	None	SBP
1	None	ABP
3	Bite Mark	ABP
2	Scar on Belly	SBP
3	Bite Mark	ABP
1	None	SBP
1	None	ABP
3	None	ABP
3	Bite Mark	SBP
1	None	ABP
1	None	ABP
1	None	ABP
3	Bite Mark	SBP
1	None	SBP
1	None	SBP
1	None	SBP
1	None	SBP
1	None	SBP
1	None	ABP
1	None	ABP
1	None	SBP
1	None	ABP
3	Bite Mark	SBP
1	None	ABP
1	None	ABP
1	None	SBP
3	Bite Mark	SBP
1	None	ABP
1	None	ABP
3	Bite Mark	SBP
2	Scar on Belly	SBP
3	Bite Mark	ABP
3	Bite Mark	SBP
1	None	ABP
1	None	ABP
1	None	ABP
1	None	SBP
1	None	SBP
1	None	SBP
1	None	ABP
3	Bite Mark	SBP
1	None	SBP
1	None	SBP
1	None	SBP
1	None	SBP
1	None	ABP
3	Bite Mark	SBP
1	None	ABP
1	None	SBP
1	None	SBP
1	None	SBP
1	None	SBP
3	Bite Mark	SBP
1	None	ABP
1	None	SBP
1	None	SBP
1	None	ABP
3	Bite Mark	SBP
3	Brown Spot	ABP
3	Bite Mark	ABP
1	None	ABP
3	Brown Spot	SBP
1	None	ABP
1	None	ABP
1	None	SBP
1	None	SBP
1	None	ABP
1	None	SBP
3	Bite Mark	ABP
3	Brown Spot	ABP
3	Brown Spot	ABP
3	Bite Mark	SBP
1	None	ABP
3	Bite Mark	SBP
3	Bite Mark	SBP
3	Bite Mark	ABP
1	None	ABP
1	None	ABP
1	None	ABP
1	None	ABP
3	Bite Mark	ABP
3	Bite Mark	ABP
1	None	SBP
1	None	ABP
1	None	ABP
3	Bite Mark	ABP
1	None	SBP
1	None	SBP
1	None	ABP
1	None	ABP
1	None	ABP
1	None	SBP
1	None	SBP
3	Bite Mark	SBP
1	None	SBP
1	None	SBP
3	Bite Mark	SBP
3	Bite Mark	ABP
1	None	SBP
3	Bite Mark	ABP
3	Bite Mark	SBP
1	None	SBP
1	None	ABP
1	None	SBP
3	Bite Mark	SBP
1	None	ABP
1	None	ABP
1	None	SBP
3	Bite Mark	SBP
1	None	SBP
1	None	SBP
1	None	ABP
1	None	SBP
3	Brown Spot	SBP
1	None	ABP
1	None	ABP
1	None	SBP
1	None	ABP
3	Bite Mark	ABP
1	None	SBP
1	None	ABP
3	Bite Mark	SBP
1	None	SBP
1	None	ABP
3	Bite Mark	ABP
1	None	SBP
1	None	SBP
1	None	SBP
2	Scar on Belly	ABP
1	None	SBP
3	Bite Mark	ABP
1	None	SBP
1	None	SBP
3	Bite Mark	SBP
2	Scar on Belly	ABP
2	Scar on Belly	ABP
3	Bite Mark	ABP
3	Bite Mark	ABP
1	None	SBP
1	None	ABP
3	Brown Spot	ABP
1	None	ABP
3	Bite Mark	SBP
3	Bite Mark	ABP
1	None	SBP
1	None	ABP
1	None	SBP
3	Bite Mark	ABP
1	None	ABP
3	Bite Mark Flank	ABP
1	None	SBP
1	None	SBP
3	Brown Spot	ABP
1	None	SBP
1	None	ABP
1	None	ABP
1	None	SBP
1	None	ABP
1	None	ABP
3	Bite Mark	ABP
1	None	ABP
3	Bite Mark	SBP
1	None	ABP
1	None	ABP
1	None	ABP
3	Brown Spot	SBP
1	None	SBP
1	None	SBP
3	Bite Mark	ABP
1	None	SBP
1	None	SBP
3	Bite Mark	ABP
3	Brown Spot	SBP
1	None	ABP
3	Bite Mark	ABP
1	None	ABP
2	Scar on Belly	SBP
1	None	ABP
3	Bite Mark	ABP
3	Bite Mark	ABP
1	None	SBP
2	Scar on Belly	ABP
1	None	SBP
1	None	ABP
1	None	SBP
1	None	ABP
1	None	SBP
3	Bite Mark	ABP
1	None	SBP
1	None	SBP
1	None	ABP
1	None	SBP
1	None	ABP
3	Bite Mark	ABP
1	None	SBP
2	Scar on Belly	SBP
1	None	SBP
3	Bite Mark	SBP
3	Brown Spot	ABP
3	Bite Mark Flank	SBP
1	None	SBP
1	None	SBP
1	None	ABP
1	None	ABP
1	None	SBP
1	None	SBP
2	Scar on Belly	SBP
3	Bite Mark	ABP
1	None	SBP
1	None	ABP
3	Bite Mark	ABP
1	None	SBP
1	None	ABP
1	None	SBP
1	None	SBP
1	None	ABP
1	None	SBP
1	None	ABP
1	None	SBP
1	None	ABP
1	None	ABP
1	None	ABP
1	None	SBP
3	Bite Mark	ABP
1	None	SBP
1	None	SBP
1	None	ABP
1	None	SBP
3	Bite Mark	ABP
1	None	SBP
1	None	ABP
1	None	ABP
1	None	SBP
1	None	ABP
1	None	ABP
1	None	SBP
1	None	ABP
1	None	SBP
1	None	SBP
1	None	ABP
1	None	ABP
3	Bite Mark Flank	ABP
1	None	SBP
3	Bite Mark	SBP
1	None	ABP
1	None	SBP
3	Bite Mark	SBP
1	None	ABP
1	None	ABP
3	Brown Spot	SBP
1	None	ABP
1	None	ABP
3	Bite Mark	ABP
1	None	ABP
3	Bite Mark	SBP
3	Brown Spot	ABP
3	Bite Mark	SBP
1	None	SBP
1	None	ABP
1	None	SBP
1	None	SBP
1	None	SBP
3	Bite Mark	SBP
1	None	SBP
1	None	ABP
3	Bite Mark	SBP
1	None	SBP
1	None	ABP
1	None	SBP
3	Bite Mark	ABP
1	None	SBP
1	None	SBP
2	Scar on Belly	SBP
1	None	SBP
1	None	SBP
3	Bite Mark	ABP
1	None	ABP
3	Bite Mark	SBP
1	None	SBP
1	None	ABP
3	Bite Mark	SBP
3	Bite Mark	SBP
1	None	SBP
1	None	ABP
1	None	ABP
3	Bite Mark	SBP
2	Scar on Belly	SBP
3	Bite Mark	ABP
1	None	SBP
1	None	SBP
2	Scar on Belly	SBP
3	Bite Mark	ABP
1	None	SBP
3	Bite Mark	SBP
1	None	SBP
1	None	SBP
1	None	SBP
1	None	SBP
1	None	SBP
1	None	SBP
1	None	SBP
1	None	ABP
1	None	SBP
1	None	SBP
1	None	SBP
1	None	SBP
1	None	SBP
3	Bite Mark	ABP
1	None	ABP
1	None	SBP
1	None	SBP
1	None	ABP
3	Bite Mark	SBP
3	Bite Mark	SBP
3	Bite Mark	SBP
1	None	SBP
1	None	ABP
1	None	ABP
1	None	SBP
3	Bite Mark	SBP
1	None	ABP
1	None	SBP
1	None	SBP
1	None	SBP
1	None	ABP
1	None	ABP
1	None	ABP
3	Bite Mark	ABP
3	Bite Mark	SBP
3	Bite Mark	ABP
3	Bite Mark	ABP
3	Bite Mark	SBP
1	None	SBP
1	None	ABP
3	Brown Spot	ABP
1	None	SBP
1	None	SBP
1	None	ABP
1	None	ABP
2	Scar on Belly	SBP
1	None	ABP
2	Scar on Belly	ABP
1	None	SBP
1	None	ABP
1	None	ABP
3	Bite Mark	SBP
1	None	ABP
1	None	SBP
2	Scar on Belly	SBP
3	Brown Spot	ABP
1	None	SBP
1	None	ABP
1	None	SBP
1	None	SBP
1	None	ABP
1	None	SBP
1	None	SBP
1	None	ABP
1	None	ABP
1	None	SBP
1	None	SBP
1	None	ABP
3	Bite Mark	ABP
1	None	SBP
1	None	SBP
1	None	SBP
3	Bite Mark	SBP
1	None	ABP
3	Bite Mark	ABP
1	None	SBP
3	Bite Mark	ABP
2	Scar on Belly	ABP
1	None	SBP
3	Brown Spot	SBP
1	None	ABP
3	Bite Mark	ABP
1	None	ABP
1	None	ABP
1	None	SBP
3	Bite Mark	ABP
1	None	ABP
1	None	SBP
3	Bite Mark	SBP
1	None	ABP
2	Scar on Belly	ABP
1	None	ABP
1	None	ABP
1	None	SBP
2	Scar on Belly	SBP
1	None	SBP
3	Bite Mark	ABP
3	Bite Mark	ABP
3	Bite Mark	SBP
1	None	ABP
1	None	SBP
1	None	SBP
3	Bite Mark	SBP
1	None	SBP
1	None	ABP
3	Bite Mark	SBP
3	Bite Mark	ABP
1	None	SBP
1	None	ABP

## Sheet: Eating Duration Start
P	W	Date	Day	Pen	Start	Group finish	Final Chance	Group Eating Time	Total Eating Time	Feed
Start	1	2021-06-15	Tuesday	PEN1	2021-06-15 13:05:00	2021-06-15 14:12:00	2021-06-15 15:38:00	67	153	ABP
Start	1	2021-06-16	Wednesday	PEN1	2021-06-16 13:06:00	2021-06-16 14:15:00	2021-06-16 14:43:00	69	97	ABP
Start	1	2021-06-17	Thursday	PEN1	2021-06-17 12:58:00	2021-06-17 14:20:00	2021-06-17 15:48:00	82	170	ABP
Start	1	2021-06-18	Friday	PEN1	2021-06-18 13:31:00	2021-06-18 15:01:00	2021-06-18 16:32:00	90	181	ABP
Start	1	2021-06-21	Monday	PEN1	2021-06-21 13:13:00	2021-06-21 13:51:00	2021-06-21 14:00:00	38	47	ABP
Start	2	2021-06-22	Tuesday	PEN1	2021-06-22 13:49:00	2021-06-22 14:53:00	2021-06-22 15:34:00	64	105	ABP
Start	2	2021-06-23	Wednesday	PEN1	2021-06-23 14:08:00	2021-06-23 14:53:00	2021-06-23 16:44:00	45	156	ABP
Start	2	2021-06-24	Thursday	PEN1	2021-06-24 13:42:00	2021-06-24 14:18:00	2021-06-24 15:45:00	36	123	ABP
Start	2	2021-06-25	Friday	PEN1	2021-06-25 15:36:00	2021-06-25 16:03:00	2021-06-25 16:40:00	27	64	ABP
Start	2	2021-06-28	Monday	PEN1	2021-06-28 14:46:00	2021-06-28 14:57:00	2021-06-28 15:20:00	11	34	ABP
Start	1	2021-06-15	Tuesday	PEN2	2021-06-15 14:46:00	2021-06-15 15:52:00	2021-06-15 16:06:00	66	80	SBP
Start	1	2021-06-16	Wednesday	PEN2	2021-06-16 14:35:00	2021-06-16 15:47:00	2021-06-16 16:45:00	72	130	SBP
Start	1	2021-06-17	Thursday	PEN2	2021-06-17 13:38:00	2021-06-17 14:30:00	2021-06-17 16:06:00	52	148	SBP
Start	1	2021-06-18	Friday	PEN2	2021-06-18 15:23:00	2021-06-18 16:31:00	2021-06-18 17:40:00	68	137	SBP
Start	1	2021-06-21	Monday	PEN2	2021-06-21 15:45:00	2021-06-21 16:17:00	2021-06-21 16:28:00	32	43	SBP
Start	2	2021-06-22	Tuesday	PEN2	2021-06-22 14:27:00	2021-06-22 14:52:00	2021-06-22 16:50:00	25	143	SBP
Start	2	2021-06-23	Wednesday	PEN2	2021-06-23 15:12:00	2021-06-23 15:38:00	2021-06-23 18:30:00	26	198	SBP
Start	2	2021-06-24	Thursday	PEN2	2021-06-24 14:01:00	2021-06-24 14:20:00	2021-06-24 16:10:00	19	129	SBP
Start	2	2021-06-25	Friday	PEN2	2021-06-25 15:10:00	2021-06-25 15:28:00	2021-06-25 16:58:00	18	108	SBP
Start	2	2021-06-28	Monday	PEN2	2021-06-28 14:51:00	2021-06-28 15:00:00	2021-06-28 15:15:00	9	24	SBP
Start	1	2021-06-15	Tuesday	PEN3	2021-06-15 13:09:00	2021-06-15 14:10:00	2021-06-15 16:18:00	61	189	ABP
Start	1	2021-06-16	Wednesday	PEN3	2021-06-16 13:09:00	2021-06-16 14:13:00	2021-06-16 16:37:00	64	208	ABP
Start	1	2021-06-17	Thursday	PEN3	2021-06-17 13:00:00	2021-06-17 13:15:00	2021-06-17 15:42:00	15	162	ABP
Start	1	2021-06-18	Friday	PEN3	2021-06-18 13:31:00	2021-06-18 14:16:00	2021-06-18 16:40:00	45	189	ABP
Start	1	2021-06-21	Monday	PEN3	2021-06-21 13:33:00	2021-06-21 14:09:00	2021-06-21 15:25:00	36	112	ABP
Start	2	2021-06-22	Tuesday	PEN3	2021-06-22 13:51:00	2021-06-22 14:12:00	2021-06-22 16:06:00	21	135	ABP
Start	2	2021-06-23	Wednesday	PEN3	2021-06-23 14:09:00	2021-06-23 14:35:00	2021-06-23 16:54:00	26	165	ABP
Start	2	2021-06-24	Thursday	PEN3	2021-06-24 13:42:00	2021-06-24 14:46:00	2021-06-24 15:14:00	64	92	ABP
Start	2	2021-06-25	Friday	PEN3	2021-06-25	2021-06-25	2021-06-25	0	0	ABP
Start	2	2021-06-28	Monday	PEN3	2021-06-28	2021-06-28	2021-06-28	0	0	ABP
Start	1	2021-06-15	Tuesday	PEN4	2021-06-15 15:09:00	2021-06-15 16:06:00	2021-06-15 16:16:00	57	67	SBP
Start	1	2021-06-16	Wednesday	PEN4	2021-06-16 15:00:00	2021-06-16 17:13:00	2021-06-16 17:59:00	133	179	SBP
Start	1	2021-06-17	Thursday	PEN4	2021-06-17 13:47:00	2021-06-17 14:38:00	2021-06-17 16:10:00	51	143	SBP
Start	1	2021-06-18	Friday	PEN4	2021-06-18 14:19:00	2021-06-18 15:14:00	2021-06-18 17:12:00	55	173	SBP
Start	1	2021-06-21	Monday	PEN4	2021-06-21 15:47:00	2021-06-21 16:04:00	2021-06-21 16:20:00	17	33	SBP
Start	2	2021-06-22	Tuesday	PEN4	2021-06-22 14:25:00	2021-06-22 14:50:00	2021-06-22 16:05:00	25	100	SBP
Start	2	2021-06-23	Wednesday	PEN4	2021-06-23 15:10:00	2021-06-23 15:49:00	2021-06-23 17:25:00	39	135	SBP
Start	2	2021-06-24	Thursday	PEN4	2021-06-24 14:04:00	2021-06-24 14:53:00	2021-06-24 16:10:00	49	126	SBP
Start	2	2021-06-25	Friday	PEN4	2021-06-25 15:16:00	2021-06-25 15:27:00	2021-06-25 16:45:00	11	89	SBP
Start	2	2021-06-28	Monday	PEN4	2021-06-28 14:48:00	2021-06-28 15:00:00	2021-06-28 15:24:00	12	36	SBP
Start	1	2021-06-15	Tuesday	PEN5	2021-06-15 14:50:00	2021-06-15 15:51:00	2021-06-15 16:05:00	61	75	SBP
Start	1	2021-06-16	Wednesday	PEN5	2021-06-16 14:38:00	2021-06-16 15:18:00	2021-06-16 17:00:00	40	142	SBP
Start	1	2021-06-17	Thursday	PEN5	2021-06-17 13:42:00	2021-06-17 14:38:00	2021-06-17 16:00:00	56	138	SBP
Start	1	2021-06-18	Friday	PEN5	2021-06-18 15:24:00	2021-06-18 16:30:00	2021-06-18 18:26:00	66	182	SBP
Start	1	2021-06-21	Monday	PEN5	2021-06-21 15:46:00	2021-06-21 16:08:00	2021-06-21 16:20:00	22	34	SBP
Start	2	2021-06-22	Tuesday	PEN5	2021-06-22 14:26:00	2021-06-22 15:01:00	2021-06-22 17:26:00	35	180	SBP
Start	2	2021-06-23	Wednesday	PEN5	2021-06-23 15:11:00	2021-06-23 15:49:00	2021-06-23 17:37:00	38	146	SBP
Start	2	2021-06-24	Thursday	PEN5	2021-06-24 14:02:00	2021-06-24 14:32:00	2021-06-24 16:08:00	30	126	SBP
Start	2	2021-06-25	Friday	PEN5	2021-06-25 15:16:00	2021-06-25 15:29:00	2021-06-25 17:30:00	13	134	SBP
Start	2	2021-06-28	Monday	PEN5	2021-06-28 14:50:00	2021-06-28 15:04:00	2021-06-28 15:15:00	14	25	SBP
Start	1	2021-06-15	Tuesday	PEN6	2021-06-15 13:15:00	2021-06-15 14:26:00	2021-06-15 15:10:00	71	115	ABP
Start	1	2021-06-16	Wednesday	PEN6	2021-06-16 13:12:00	2021-06-16 13:57:00	2021-06-16 18:20:00	45	308	ABP
Start	1	2021-06-17	Thursday	PEN6	2021-06-17 15:03:00	2021-06-17 15:34:00	2021-06-17 16:00:00	31	57	ABP
Start	1	2021-06-18	Friday	PEN6	2021-06-18 13:29:00	2021-06-18 14:20:00	2021-06-18 17:00:00	51	211	ABP
Start	1	2021-06-21	Monday	PEN6	2021-06-21 13:35:00	2021-06-21 13:55:00	2021-06-21 14:17:00	20	42	ABP
Start	2	2021-06-22	Tuesday	PEN6	2021-06-22 13:52:00	2021-06-22 14:17:00	2021-06-22 15:00:00	25	68	ABP
Start	2	2021-06-23	Wednesday	PEN6	2021-06-23 14:10:00	2021-06-23 14:36:00	2021-06-23 17:15:00	26	185	ABP
Start	2	2021-06-24	Thursday	PEN6	2021-06-24 13:43:00	2021-06-24 14:32:00	2021-06-24 15:08:00	49	85	ABP
Start	2	2021-06-25	Friday	PEN6	2021-06-25 15:41:00	2021-06-25 16:12:00	2021-06-25 17:08:00	31	87	ABP
Start	2	2021-06-28	Monday	PEN6	2021-06-28 14:48:00	2021-06-28 15:07:00	2021-06-28 15:15:00	19	27	ABP
Start	1	2021-06-15	Tuesday	PEN7	2021-06-15 15:14:00	2021-06-15 16:27:00	2021-06-15 16:42:00	73	88	SBP
Start	1	2021-06-16	Wednesday	PEN7	2021-06-16 15:53:00	2021-06-16 17:27:00	2021-06-16 17:52:00	94	119	SBP
Start	1	2021-06-17	Thursday	PEN7	2021-06-17 14:53:00	2021-06-17 16:12:00	2021-06-17 16:57:00	79	124	SBP
Start	1	2021-06-18	Friday	PEN7	2021-06-18 15:30:00	2021-06-18 16:38:00	2021-06-18 17:15:00	68	105	SBP
Start	1	2021-06-21	Monday	PEN7	2021-06-21 15:49:00	2021-06-21 16:28:00	2021-06-21 16:47:00	39	58	SBP
Start	2	2021-06-22	Tuesday	PEN7	2021-06-22 15:06:00	2021-06-22 15:30:00	2021-06-22 17:26:00	24	140	SBP
Start	2	2021-06-23	Wednesday	PEN7	2021-06-23 15:10:00	2021-06-23 15:41:00	2021-06-23 17:25:00	31	135	SBP
Start	2	2021-06-24	Thursday	PEN7	2021-06-24 14:20:00	2021-06-24 14:53:00	2021-06-24 16:50:00	33	150	SBP
Start	2	2021-06-25	Friday	PEN7	2021-06-25 15:27:00	2021-06-25 16:14:00	2021-06-25 17:35:00	47	128	SBP
Start	2	2021-06-28	Monday	PEN7	2021-06-28 15:27:00	2021-06-28 15:50:00	2021-06-28 16:05:00	23	38	SBP
Start	1	2021-06-15	Tuesday	PEN8	2021-06-15 13:24:00	2021-06-15 14:28:00	2021-06-15 16:15:00	64	171	ABP
Start	1	2021-06-16	Wednesday	PEN8	2021-06-16 13:31:00	2021-06-16 13:51:00	2021-06-16 16:45:00	20	194	ABP
Start	1	2021-06-17	Thursday	PEN8	2021-06-17 13:09:00	2021-06-17 14:17:00	2021-06-17 15:38:00	68	149	ABP
Start	1	2021-06-18	Friday	PEN8	2021-06-18 14:04:00	2021-06-18 15:00:00	2021-06-18 16:34:00	56	150	ABP
Start	1	2021-06-21	Monday	PEN8	2021-06-21 13:36:00	2021-06-21 14:12:00	2021-06-21 16:15:00	36	159	ABP
Start	2	2021-06-22	Tuesday	PEN8	2021-06-22 13:53:00	2021-06-22 14:26:00	2021-06-22 16:34:00	33	161	ABP
Start	2	2021-06-23	Wednesday	PEN8	2021-06-23 14:39:00	2021-06-23 15:36:00	2021-06-23 16:55:00	57	136	ABP
Start	2	2021-06-24	Thursday	PEN8	2021-06-24 13:44:00	2021-06-24 14:19:00	2021-06-24 15:44:00	35	120	ABP
Start	2	2021-06-25	Friday	PEN8	2021-06-25 15:44:00	2021-06-25 15:56:00	2021-06-25 17:00:00	12	76	ABP
Start	2	2021-06-28	Monday	PEN8	2021-06-28 15:13:00	2021-06-28 15:28:00	2021-06-28 17:20:00	15	127	ABP
Start	1	2021-06-15	Tuesday	PEN9	2021-06-15 15:21:00	2021-06-15 16:15:00	2021-06-15 16:32:00	54	71	SBP
Start	1	2021-06-16	Wednesday	PEN9	2021-06-16 15:54:00	2021-06-16 16:20:00	2021-06-16 17:20:00	26	86	SBP
Start	1	2021-06-17	Thursday	PEN9	2021-06-17 14:55:00	2021-06-17 15:52:00	2021-06-17 16:45:00	57	110	SBP
Start	1	2021-06-18	Friday	PEN9	2021-06-18 15:31:00	2021-06-18 16:46:00	2021-06-18 17:25:00	75	114	SBP
Start	1	2021-06-21	Monday	PEN9	2021-06-21 15:50:00	2021-06-21 16:22:00	2021-06-21 16:48:00	32	58	SBP
Start	2	2021-06-22	Tuesday	PEN9	2021-06-22 15:07:00	2021-06-22 15:34:00	2021-06-22 17:11:00	27	124	SBP
Start	2	2021-06-23	Wednesday	PEN9	2021-06-23 15:27:00	2021-06-23 16:10:00	2021-06-23 17:47:00	43	140	SBP
Start	2	2021-06-24	Thursday	PEN9	2021-06-24 14:22:00	2021-06-24 14:46:00	2021-06-24 16:00:00	24	98	SBP
Start	2	2021-06-25	Friday	PEN9	2021-06-25 15:27:00	2021-06-25 15:43:00	2021-06-25 16:50:00	16	83	SBP
Start	2	2021-06-28	Monday	PEN9	2021-06-28 15:28:00	2021-06-28 15:49:00	2021-06-28 16:00:00	21	32	SBP
Start	1	2021-06-15	Tuesday	PEN10	2021-06-15 13:28:00	2021-06-15 14:35:00	2021-06-15 15:37:00	67	129	ABP
Start	1	2021-06-16	Wednesday	PEN10	2021-06-16 13:49:00	2021-06-16 14:54:00	2021-06-16 16:03:00	65	134	ABP
Start	1	2021-06-17	Thursday	PEN10	2021-06-17 13:13:00	2021-06-17 14:13:00	2021-06-17 15:39:00	60	146	ABP
Start	1	2021-06-18	Friday	PEN10	2021-06-18 14:05:00	2021-06-18 15:00:00	2021-06-18 16:20:00	55	135	ABP
Start	1	2021-06-21	Monday	PEN10	2021-06-21 13:38:00	2021-06-21 14:04:00	2021-06-21 14:25:00	26	47	ABP
Start	2	2021-06-22	Tuesday	PEN10	2021-06-22 13:55:00	2021-06-22 14:13:00	2021-06-22 16:48:00	18	173	ABP
Start	2	2021-06-23	Wednesday	PEN10	2021-06-23 14:45:00	2021-06-23 15:10:00	2021-06-23 17:48:00	25	183	ABP
Start	2	2021-06-24	Thursday	PEN10	2021-06-24 13:45:00	2021-06-24 14:18:00	2021-06-24 15:45:00	33	120	ABP
Start	2	2021-06-25	Friday	PEN10	2021-06-25 15:46:00	2021-06-25 16:20:00	2021-06-25 16:58:00	34	72	ABP
Start	2	2021-06-28	Monday	PEN10	2021-06-28 15:14:00	2021-06-28 15:27:00	2021-06-28 15:40:00	13	26	ABP
Start	1	2021-06-15	Tuesday	PEN11	2021-06-15 15:29:00	2021-06-15 15:56:00	2021-06-15 17:56:00	27	147	SBP
Start	1	2021-06-16	Wednesday	PEN11	2021-06-16 15:52:00	2021-06-16 17:28:00	2021-06-16 18:38:00	96	166	SBP
Start	1	2021-06-17	Thursday	PEN11	2021-06-17 14:48:00	2021-06-17 15:55:00	2021-06-17 17:24:00	67	156	SBP
Start	1	2021-06-18	Friday	PEN11	2021-06-18 15:43:00	2021-06-18 16:28:00	2021-06-18 18:09:00	45	146	SBP
Start	1	2021-06-21	Monday	PEN11	2021-06-21 15:52:00	2021-06-21 16:00:00	2021-06-21 16:05:00	8	13	SBP
Start	2	2021-06-22	Tuesday	PEN11	2021-06-22 15:08:00	2021-06-22 15:32:00	2021-06-22 17:00:00	24	112	SBP
Start	2	2021-06-23	Wednesday	PEN11	2021-06-23 15:28:00	2021-06-23 16:22:00	2021-06-23 17:50:00	54	142	SBP
Start	2	2021-06-24	Thursday	PEN11	2021-06-24 14:22:00	2021-06-24 14:42:00	2021-06-24 16:00:00	20	98	SBP
Start	2	2021-06-25	Friday	PEN11	2021-06-25 15:28:00	2021-06-25 15:45:00	2021-06-25 16:40:00	17	72	SBP
Start	2	2021-06-28	Monday	PEN11	2021-06-28 15:29:00	2021-06-28 15:46:00	2021-06-28 16:00:00	17	31	SBP
Start	1	2021-06-15	Tuesday	PEN12	2021-06-15 15:34:00	2021-06-15 16:26:00	2021-06-15 16:56:00	52	82	SBP
Start	1	2021-06-16	Wednesday	PEN12	2021-06-16 15:51:00	2021-06-16 17:12:00	2021-06-16 17:38:00	81	107	SBP
Start	1	2021-06-17	Thursday	PEN12	2021-06-17 14:47:00	2021-06-17 15:55:00	2021-06-17 16:39:00	68	112	SBP
Start	1	2021-06-18	Friday	PEN12	2021-06-18 15:44:00	2021-06-18 16:38:00	2021-06-18 17:41:00	54	117	SBP
Start	1	2021-06-21	Monday	PEN12	2021-06-21 15:53:00	2021-06-21 16:05:00	2021-06-21 16:18:00	12	25	SBP
Start	2	2021-06-22	Tuesday	PEN12	2021-06-22 15:10:00	2021-06-22 15:34:00	2021-06-22 16:36:00	24	86	SBP
Start	2	2021-06-23	Wednesday	PEN12	2021-06-23 15:28:00	2021-06-23 15:50:00	2021-06-23 17:30:00	22	122	SBP
Start	2	2021-06-24	Thursday	PEN12	2021-06-24 14:23:00	2021-06-24 14:54:00	2021-06-24 16:20:00	31	117	SBP
Start	2	2021-06-25	Friday	PEN12	2021-06-25 15:29:00	2021-06-25 15:44:00	2021-06-25 16:50:00	15	81	SBP
Start	2	2021-06-28	Monday	PEN12	2021-06-28 15:30:00	2021-06-28 15:52:00	2021-06-28 16:02:00	22	32	SBP
Start	1	2021-06-15	Tuesday	PEN13	2021-06-15 13:36:00	2021-06-15 14:07:00	2021-06-15 16:08:00	31	152	ABP
Start	1	2021-06-16	Wednesday	PEN13	2021-06-16 14:29:00	2021-06-16 15:29:00	2021-06-16 16:01:00	60	92	ABP
Start	1	2021-06-17	Thursday	PEN13	2021-06-17 13:18:00	2021-06-17 14:09:00	2021-06-17 15:54:00	51	156	ABP
Start	1	2021-06-18	Friday	PEN13	2021-06-18 14:20:00	2021-06-18 15:00:00	2021-06-18 16:45:00	40	145	ABP
Start	1	2021-06-21	Monday	PEN13	2021-06-21 14:24:00	2021-06-21 14:39:00	2021-06-21 15:08:00	15	44	ABP
Start	2	2021-06-22	Tuesday	PEN13	2021-06-22 13:56:00	2021-06-22 14:38:00	2021-06-22 16:12:00	42	136	ABP
Start	2	2021-06-23	Wednesday	PEN13	2021-06-23 14:52:00	2021-06-23 15:10:00	2021-06-23 17:18:00	18	146	ABP
Start	2	2021-06-24	Thursday	PEN13	2021-06-24 13:46:00	2021-06-24 14:07:00	2021-06-24 15:50:00	21	124	ABP
Start	2	2021-06-25	Friday	PEN13	2021-06-25 15:51:00	2021-06-25 16:22:00	2021-06-25 17:20:00	31	89	ABP
Start	2	2021-06-28	Monday	PEN13	2021-06-28 15:15:00	2021-06-28 15:28:00	2021-06-28 16:00:00	13	45	ABP

## Sheet: Eating Duration End
P	Start	Group finish	Final Chance	Group Eating Time	Total Eating Time	Feed
END	2022-01-17	2022-01-17	2022-01-17	0	0	ABP
END	2022-01-17 14:51:00	2022-01-17 15:00:00	2022-01-17 15:10:00	9	19	SBP
END	2022-01-17 14:47:00	2022-01-17 14:58:00	2022-01-17 15:33:00	11	46	ABP
END	2022-01-17 15:03:00	2022-01-17 15:16:00	2022-01-17 15:21:00	13	18	SBP
END	2022-01-17	2022-01-17	2022-01-17	0	0	SBP
END	2022-01-17 12:34:00	2022-01-17 13:00:00	2022-01-17 13:30:00	26	56	ABP
END	2022-01-17 14:18:00	2022-01-17 14:30:00	2022-01-17 15:05:00	12	47	SBP
END	2022-01-17	2022-01-17	2022-01-17	0	0	ABP
END	2022-01-17	2022-01-17	2022-01-17	0	0	SBP
END	2022-01-17 12:58:00	2022-01-17 13:16:00	2022-01-17 14:00:00	18	62	ABP
END	2022-01-17	2022-01-17	2022-01-17	0	0	SBP
END	2022-01-17 13:21:00	2022-01-17 13:34:00	2022-01-17 13:45:00	13	24	SBP
END	2022-01-17 11:59:00	2022-01-17 12:11:00	2022-01-17 12:15:00	12	16	ABP
END	2022-01-18	2022-01-18	2022-01-18	0	0	ABP
END	2022-01-18 14:08:00	2022-01-18 14:22:00	2022-01-18 14:36:00	14	28	SBP
END	2022-01-18 11:09:00	2022-01-18 11:24:00	2022-01-18 11:47:00	15	38	ABP
END	2022-01-18 14:15:00	2022-01-18 14:29:00	2022-01-18 14:45:00	14	30	SBP
END	2022-01-18	2022-01-18	2022-01-18	0	0	SBP
END	2022-01-18 10:10:00	2022-01-18 10:34:00	2022-01-18 11:15:00	24	65	ABP
END	2022-01-18 14:18:00	2022-01-18 14:26:00	2022-01-18 17:30:00	8	192	SBP
END	2022-01-18	2022-01-18	2022-01-18	0	0	ABP
END	2022-01-18	2022-01-18	2022-01-18	0	0	SBP
END	2022-01-18 12:51:00	2022-01-18 13:16:00	2022-01-18 14:00:00	25	69	ABP
END	2022-01-18	2022-01-18	2022-01-18	0	0	SBP
END	2022-01-18 13:59:00	2022-01-18 14:16:00	2022-01-18 15:00:00	17	61	SBP
END	2022-01-18 11:52:00	2022-01-18 12:05:00	2022-01-18 13:36:00	13	104	ABP
END	2022-01-19	2022-01-19	2022-01-19	0	0	ABP
END	2022-01-19 14:41:00	2022-01-19 14:54:00	2022-01-19 15:16:00	13	35	SBP
END	2022-01-19 15:22:00	2022-01-19 15:34:00	2022-01-19 16:00:00	12	38	ABP
END	2022-01-19 14:44:00	2022-01-19 14:58:00	2022-01-19 15:02:00	14	18	SBP
END	2022-01-19	2022-01-19	2022-01-19	0	0	SBP
END	2022-01-19 14:24:00	2022-01-19 14:44:00	2022-01-19 15:20:00	20	56	ABP
END	2022-01-19 15:14:00	2022-01-19 15:24:00	2022-01-19 17:10:00	10	116	SBP
END	2022-01-19	2022-01-19	2022-01-19	0	0	ABP
END	2022-01-19	2022-01-19	2022-01-19	0	0	SBP
END	2022-01-19 15:25:00	2022-01-19 15:36:00	2022-01-19 16:15:00	11	50	ABP
END	2022-01-19	2022-01-19	2022-01-19	0	0	SBP
END	2022-01-19 14:12:00	2022-01-19 14:22:00	2022-01-19 16:30:00	10	138	SBP
END	2022-01-19 14:26:00	2022-01-19 14:36:00	2022-01-19 16:46:00	10	140	ABP
END	2022-01-20	2022-01-20	2022-01-20	0	0	ABP
END	2022-01-20 13:28:00	2022-01-20 13:41:00	2022-01-20 16:50:00	13	202	SBP
END	2022-01-20 09:49:00	2022-01-20 09:49:00	2022-01-20 12:30:00	0	161	ABP
END	2022-01-20 13:30:00	2022-01-20 13:41:00	2022-01-20 15:12:00	11	102	SBP
END	2022-01-20	2022-01-20	2022-01-20	0	0	SBP
END	2022-01-20 08:50:00	2022-01-20 08:52:00	2022-01-20 12:30:00	2	220	ABP
END	2022-01-20 13:37:00	2022-01-20 13:40:00	2022-01-20 16:40:00	3	183	SBP
END	2022-01-20	2022-01-20	2022-01-20	0	0	ABP
END	2022-01-20	2022-01-20	2022-01-20	0	0	SBP
END	2022-01-20 09:53:00	2022-01-20 09:56:00	2022-01-20 13:40:00	3	227	ABP
END	2022-01-20	2022-01-20	2022-01-20	0	0	SBP
END	2022-01-20 14:10:00	2022-01-20 14:15:00	2022-01-20 16:15:00	5	125	SBP
END	2022-01-20 08:54:00	2022-01-20 09:01:00	2022-01-20 13:08:00	7	254	ABP
END	2022-01-21	2022-01-21	2022-01-21	0	0	ABP
END	2022-01-21 10:01:00	2022-01-21 10:13:00	2022-01-21 12:50:00	12	169	SBP
END	2022-01-21 09:28:00	2022-01-21 09:28:00	2022-01-21 11:37:00	0	129	ABP
END	2022-01-21 13:12:00	2022-01-21 13:30:00	2022-01-21 14:56:00	18	104	SBP
END	2022-01-21	2022-01-21	2022-01-21	0	0	SBP
END	2022-01-21 09:36:00	2022-01-21 09:36:00	2022-01-21 12:00:00	0	144	ABP
END	2022-01-21 11:26:00	2022-01-21 11:26:00	2022-01-21 14:00:00	0	154	SBP
END	2022-01-21	2022-01-21	2022-01-21	0	0	ABP
END	2022-01-21	2022-01-21	2022-01-21	0	0	SBP
END	2022-01-21 08:53:00	2022-01-21 08:53:00	2022-01-21 14:00:00	0	307	ABP
END	2022-01-21	2022-01-21	2022-01-21	0	0	SBP
END	2022-01-21 08:30:00	2022-01-21 08:53:00	2022-01-21 14:00:00	23	330	SBP
END	2022-01-21 07:45:00	2022-01-21 07:45:00	2022-01-21 14:30:00	0	405	ABP
END	2022-01-24	2022-01-24	2022-01-24	0	0	ABP
END	2022-01-24 10:13:00	2022-01-24 10:23:00	2022-01-24 10:46:00	10	33	SBP
END	2022-01-24 09:34:00	2022-01-24 09:47:00	2022-01-24 10:13:00	13	39	ABP
END	2022-01-24 10:19:00	2022-01-24 10:26:00	2022-01-24 10:46:00	7	27	SBP
END	2022-01-24	2022-01-24	2022-01-24	0	0	SBP
END	2022-01-24 09:33:00	2022-01-24 09:54:00	2022-01-24 11:45:00	21	132	ABP
END	2022-01-24 13:10:00	2022-01-24 13:21:00	2022-01-24 15:00:00	11	110	SBP
END	2022-01-24	2022-01-24	2022-01-24	0	0	ABP
END	2022-01-24	2022-01-24	2022-01-24	0	0	SBP
END	2022-01-24 12:59:00	2022-01-24 13:11:00	2022-01-24 13:35:00	12	36	ABP
END	2022-01-24	2022-01-24	2022-01-24	0	0	SBP
END	2022-01-24 14:28:00	2022-01-24 14:34:00	2022-01-24 15:32:00	6	64	SBP
END	2022-01-24 14:30:00	2022-01-24 14:52:00	2022-01-24 15:15:00	22	45	ABP
END	2022-01-25	2022-01-25	2022-01-25	0	0	ABP
END	2022-01-25 09:03:00	2022-01-25 09:18:00	2022-01-25 10:52:00	15	109	SBP
END	2022-01-25 08:52:00	2022-01-25 09:00:00	2022-01-25 11:08:00	8	136	ABP
END	2022-01-25 09:06:00	2022-01-25 09:19:00	2022-01-25 10:44:00	13	98	SBP
END	2022-01-25	2022-01-25	2022-01-25	0	0	SBP
END	2022-01-25 07:52:00	2022-01-25 08:08:00	2022-01-25 09:50:00	16	118	ABP
END	2022-01-25 09:09:00	2022-01-25 09:20:00	2022-01-25 15:00:00	11	351	SBP
END	2022-01-25	2022-01-25	2022-01-25	0	0	ABP
END	2022-01-25	2022-01-25	2022-01-25	0	0	SBP
END	2022-01-25 07:55:00	2022-01-25 08:04:00	2022-01-25 09:10:00	9	75	ABP
END	2022-01-25	2022-01-25	2022-01-25	0	0	SBP
END	2022-01-25 08:20:00	2022-01-25 08:30:00	2022-01-25 14:30:00	10	370	SBP
END	2022-01-25 07:53:00	2022-01-25 07:56:00	2022-01-25 10:10:00	3	137	ABP
END	2022-01-26	2022-01-26	2022-01-26	0	0	ABP
END	2022-01-26 14:26:00	2022-01-26 14:40:00	2022-01-26 16:06:00	14	100	SBP
END	2022-01-26 14:40:00	2022-01-26 14:48:00	2022-01-26 15:22:00	8	42	ABP
END	2022-01-26 14:31:00	2022-01-26 14:43:00	2022-01-26 15:10:00	12	39	SBP
END	2022-01-26	2022-01-26	2022-01-26	0	0	SBP
END	2022-01-26 13:43:00	2022-01-26 13:59:00	2022-01-26 14:35:00	16	52	ABP
END	2022-01-26 15:32:00	2022-01-26 15:42:00	2022-01-26 17:35:00	10	123	SBP
END	2022-01-26	2022-01-26	2022-01-26	0	0	ABP
END	2022-01-26	2022-01-26	2022-01-26	0	0	SBP
END	2022-01-26 13:52:00	2022-01-26 14:09:00	2022-01-26 15:15:00	17	83	ABP
END	2022-01-26	2022-01-26	2022-01-26	0	0	SBP
END	2022-01-26 14:34:00	2022-01-26 14:44:00	2022-01-26 15:50:00	10	76	SBP
END	2022-01-26 13:57:00	2022-01-26 14:13:00	2022-01-26 15:45:00	16	108	ABP
END	2022-01-27	2022-01-27	2022-01-27	0	0	ABP
END	2022-01-27 09:41:00	2022-01-27 09:55:00	2022-01-27 14:50:00	14	309	SBP
END	2022-01-27 10:51:00	2022-01-27 11:00:00	2022-01-27 14:20:00	9	209	ABP
END	2022-01-27 09:57:00	2022-01-27 10:07:00	2022-01-27 13:54:00	10	237	SBP
END	2022-01-27	2022-01-27	2022-01-27	0	0	SBP
END	2022-01-27 09:53:00	2022-01-27 10:04:00	2022-01-27 11:20:00	11	87	ABP
END	2022-01-27 10:01:00	2022-01-27 10:22:00	2022-01-27 16:30:00	21	389	SBP
END	2022-01-27	2022-01-27	2022-01-27	0	0	ABP
END	2022-01-27	2022-01-27	2022-01-27	0	0	SBP
END	2022-01-27 12:54:00	2022-01-27 13:14:00	2022-01-27 16:30:00	20	216	ABP
END	2022-01-27	2022-01-27	2022-01-27	0	0	SBP
END	2022-01-27 09:04:00	2022-01-27 09:10:00	2022-01-27 13:48:00	6	284	SBP
END	2022-01-27 12:53:00	2022-01-27 13:12:00	2022-01-27 14:35:00	19	102	ABP
END	2022-01-28	2022-01-28	2022-01-28	0	0	ABP
END	2022-01-28 13:51:00	2022-01-28 14:07:00	2022-01-28 14:32:00	16	41	SBP
END	2022-01-28	2022-01-28	2022-01-28	0	0	ABP
END	2022-01-28	2022-01-28	2022-01-28	0	0	SBP
END	2022-01-28	2022-01-28	2022-01-28	0	0	SBP
END	2022-01-28	2022-01-28	2022-01-28	0	0	ABP
END	2022-01-28 13:52:00	2022-01-28 14:02:00	2022-01-28 17:45:00	10	233	SBP
END	2022-01-28	2022-01-28	2022-01-28	0	0	ABP
END	2022-01-28	2022-01-28	2022-01-28	0	0	SBP
END	2022-01-28	2022-01-28	2022-01-28	0	0	ABP
END	2022-01-28	2022-01-28	2022-01-28	0	0	SBP
END	2022-01-28 13:23:00	2022-01-28 13:27:00	2022-01-28 15:30:00	4	127	SBP
END	2022-01-28 14:09:00	2022-01-28 14:30:00	2022-01-28 15:35:00	21	86	ABP
END	2022-01-31	2022-01-31	2022-01-31	0	0	ABP
END	2022-01-31 13:59:00	2022-01-31 14:16:00	2022-01-31 14:50:00	17	51	SBP
END	2022-01-31 10:42:00	2022-01-31 10:52:00	2022-01-31 12:10:00	10	88	ABP
END	2022-01-31 14:26:00	2022-01-31 14:34:00	2022-01-31 14:45:00	8	19	SBP
END	2022-01-31	2022-01-31	2022-01-31	0	0	SBP
END	2022-01-31 10:03:00	2022-01-31 10:15:00	2022-01-31 11:19:00	12	76	ABP
END	2022-01-31 14:27:00	2022-01-31 14:35:00	2022-01-31 16:05:00	8	98	SBP
END	2022-01-31	2022-01-31	2022-01-31	0	0	ABP
END	2022-01-31	2022-01-31	2022-01-31	0	0	SBP
END	2022-01-31 12:33:00	2022-01-31 12:54:00	2022-01-31 14:10:00	21	97	ABP
END	2022-01-31	2022-01-31	2022-01-31	0	0	SBP
END	2022-01-31 14:05:00	2022-01-31 14:11:00	2022-01-31 15:20:00	6	75	SBP
END	2022-01-31 14:17:00	2022-01-31 14:48:00	2022-01-31 15:30:00	31	73	ABP

## Sheet: Behaviour Sums
time	Feed	sum_P	sum_A	sum_T	Period
00:00:00	ABP	1099	116	11004	Start
00:00:00	SBP	1401	119	12544	Start
10:00:00	ABP	272	51	11004	Start
10:00:00	SBP	368	68	12544	Start
11:00:00	ABP	269	51	11004	Start
11:00:00	SBP	344	55	12544	Start
12:00:00	ABP	289	61	11004	Start
12:00:00	SBP	401	86	12544	Start
13:00:00	ABP	285	72	11004	Start
13:00:00	SBP	422	70	12544	Start
14:00:00	ABP	258	104	11004	Start
14:00:00	SBP	366	135	12544	Start
15:00:00	ABP	282	97	11004	Start
15:00:00	SBP	391	129	12544	Start
16:00:00	ABP	420	89	11004	Start
16:00:00	SBP	546	145	12544	Start
17:00:00	ABP	636	91	11004	Start
17:00:00	SBP	723	130	12544	Start
18:00:00	ABP	642	79	11004	Start
18:00:00	SBP	806	83	12544	Start
19:00:00	ABP	824	94	11004	Start
19:00:00	SBP	984	109	12544	Start
01:00:00	ABP	997	101	11004	Start
01:00:00	SBP	1370	121	12544	Start
20:00:00	ABP	986	94	11004	Start
20:00:00	SBP	1155	107	12544	Start
21:00:00	ABP	934	118	11004	Start
21:00:00	SBP	1174	143	12544	Start
22:00:00	ABP	1066	110	11004	Start
22:00:00	SBP	1351	134	12544	Start
23:00:00	ABP	1088	116	11004	Start
23:00:00	SBP	1408	113	12544	Start
02:00:00	ABP	1039	100	11004	Start
02:00:00	SBP	1417	109	12544	Start
03:00:00	ABP	1003	96	11004	Start
03:00:00	SBP	1390	95	12544	Start
04:00:00	ABP	1202	113	11004	Start
04:00:00	SBP	1548	110	12544	Start
05:00:00	ABP	1144	104	11004	Start
05:00:00	SBP	1405	107	12544	Start
06:00:00	ABP	907	113	11004	Start
06:00:00	SBP	1114	126	12544	Start
07:00:00	ABP	723	85	11004	Start
07:00:00	SBP	955	94	12544	Start
08:00:00	ABP	454	75	11004	Start
08:00:00	SBP	610	101	12544	Start
09:00:00	ABP	301	75	11004	Start
09:00:00	SBP	420	98	12544	Start
00:00:00	ABP	829	61	13362	End
00:00:00	SBP	925	79	15232	End
10:00:00	ABP	260	68	13362	End
10:00:00	SBP	296	61	15232	End
11:00:00	ABP	293	74	13362	End
11:00:00	SBP	336	74	15232	End
12:00:00	ABP	326	61	13362	End
12:00:00	SBP	353	64	15232	End
13:00:00	ABP	322	74	13362	End
13:00:00	SBP	358	78	15232	End
14:00:00	ABP	332	83	13362	End
14:00:00	SBP	339	93	15232	End
15:00:00	ABP	363	72	13362	End
15:00:00	SBP	350	77	15232	End
16:00:00	ABP	498	65	13362	End
16:00:00	SBP	471	92	15232	End
17:00:00	ABP	604	66	13362	End
17:00:00	SBP	596	81	15232	End
18:00:00	ABP	616	43	13362	End
18:00:00	SBP	614	54	15232	End
19:00:00	ABP	690	59	13362	End
19:00:00	SBP	638	61	15232	End
01:00:00	ABP	860	54	13362	End
01:00:00	SBP	901	54	15232	End
20:00:00	ABP	705	61	13362	End
20:00:00	SBP	710	67	15232	End
21:00:00	ABP	775	46	13362	End
21:00:00	SBP	748	56	15232	End
22:00:00	ABP	831	56	13362	End
22:00:00	SBP	812	67	15232	End
23:00:00	ABP	826	52	13362	End
23:00:00	SBP	847	66	15232	End
02:00:00	ABP	865	42	13362	End
02:00:00	SBP	867	54	15232	End
03:00:00	ABP	812	44	13362	End
03:00:00	SBP	809	37	15232	End
04:00:00	ABP	837	50	13362	End
04:00:00	SBP	868	55	15232	End
05:00:00	ABP	808	57	13362	End
05:00:00	SBP	887	44	15232	End
06:00:00	ABP	754	54	13362	End
06:00:00	SBP	818	52	15232	End
07:00:00	ABP	697	57	13362	End
07:00:00	SBP	813	68	15232	End
08:00:00	ABP	421	54	13362	End
08:00:00	SBP	609	59	15232	End
09:00:00	ABP	305	58	13362	End
09:00:00	SBP	344	51	15232	End

## Sheet: Behaviour Means
time	Feed	mean_P	mean_A	Total	Period	F_P
00:00:00	ABP	13.7375	1.45	131	Start	ABP Start
00:00:00	SBP	14.2959	1.21429	128	Start	SBP Start
01:00:00	ABP	12.4625	1.2625	131	Start	ABP Start
01:00:00	SBP	13.9796	1.23469	128	Start	SBP Start
02:00:00	ABP	12.9875	1.25	131	Start	ABP Start
02:00:00	SBP	14.4592	1.11224	128	Start	SBP Start
03:00:00	ABP	12.5375	1.2	131	Start	ABP Start
03:00:00	SBP	14.1837	0.969388	128	Start	SBP Start
04:00:00	ABP	15.025	1.4125	131	Start	ABP Start
04:00:00	SBP	15.7959	1.12245	128	Start	SBP Start
05:00:00	ABP	14.3	1.3	131	Start	ABP Start
05:00:00	SBP	14.3367	1.09184	128	Start	SBP Start
06:00:00	ABP	11.3375	1.4125	131	Start	ABP Start
06:00:00	SBP	11.3673	1.28571	128	Start	SBP Start
07:00:00	ABP	9.0375	1.0625	131	Start	ABP Start
07:00:00	SBP	9.7449	0.959184	128	Start	SBP Start
08:00:00	ABP	5.675	0.9375	131	Start	ABP Start
08:00:00	SBP	6.22449	1.03061	128	Start	SBP Start
09:00:00	ABP	3.7625	0.974026	131	Start	ABP Start
09:00:00	SBP	4.28571	1.02083	128	Start	SBP Start
10:00:00	ABP	3.4	0.653846	131	Start	ABP Start
10:00:00	SBP	3.79381	0.693878	128	Start	SBP Start
11:00:00	ABP	3.3625	0.6375	131	Start	ABP Start
11:00:00	SBP	3.5102	0.585106	128	Start	SBP Start
12:00:00	ABP	3.6125	0.7625	131	Start	ABP Start
12:00:00	SBP	4.09184	0.877551	128	Start	SBP Start
13:00:00	ABP	3.5625	0.9	131	Start	ABP Start
13:00:00	SBP	4.30612	0.714286	128	Start	SBP Start
14:00:00	ABP	3.225	1.31646	131	Start	ABP Start
14:00:00	SBP	3.73469	1.39175	128	Start	SBP Start
15:00:00	ABP	3.525	1.2125	131	Start	ABP Start
15:00:00	SBP	3.9898	1.31633	128	Start	SBP Start
16:00:00	ABP	5.31646	1.14103	131	Start	ABP Start
16:00:00	SBP	5.57143	1.47959	128	Start	SBP Start
17:00:00	ABP	8.05063	1.1519	131	Start	ABP Start
17:00:00	SBP	7.37755	1.32653	128	Start	SBP Start
18:00:00	ABP	8.12658	1	131	Start	ABP Start
18:00:00	SBP	8.22449	0.846939	128	Start	SBP Start
19:00:00	ABP	10.4304	1.18987	131	Start	ABP Start
19:00:00	SBP	10.0408	1.11224	128	Start	SBP Start
20:00:00	ABP	12.481	1.18987	131	Start	ABP Start
20:00:00	SBP	11.7857	1.09184	128	Start	SBP Start
21:00:00	ABP	11.8228	1.49367	131	Start	ABP Start
21:00:00	SBP	11.9796	1.45918	128	Start	SBP Start
22:00:00	ABP	13.4937	1.39241	131	Start	ABP Start
22:00:00	SBP	13.7857	1.36735	128	Start	SBP Start
23:00:00	ABP	13.7722	1.46835	131	Start	ABP Start
23:00:00	SBP	14.3673	1.15306	128	Start	SBP Start
00:00:00	ABP	12.3731	0.910448	131	End	ABP End
00:00:00	SBP	13.6029	1.16176	128	End	SBP End
01:00:00	ABP	12.8358	0.80597	131	End	ABP End
01:00:00	SBP	13.25	0.794118	128	End	SBP End
02:00:00	ABP	12.7206	0.617647	131	End	ABP End
02:00:00	SBP	12.75	0.794118	128	End	SBP End
03:00:00	ABP	11.9412	0.647059	131	End	ABP End
03:00:00	SBP	11.8971	0.544118	128	End	SBP End
04:00:00	ABP	12.3088	0.735294	131	End	ABP End
04:00:00	SBP	12.7647	0.808824	128	End	SBP End
05:00:00	ABP	11.8824	0.838235	131	End	ABP End
05:00:00	SBP	13.0441	0.647059	128	End	SBP End
06:00:00	ABP	11.0882	0.794118	131	End	ABP End
06:00:00	SBP	12.0294	0.764706	128	End	SBP End
07:00:00	ABP	10.25	0.838235	131	End	ABP End
07:00:00	SBP	11.9559	1	128	End	SBP End
08:00:00	ABP	6.19118	0.794118	131	End	ABP End
08:00:00	SBP	8.95588	0.867647	128	End	SBP End
09:00:00	ABP	4.48529	0.852941	131	End	ABP End
09:00:00	SBP	5.05882	0.75	128	End	SBP End
10:00:00	ABP	3.82353	1.01493	131	End	ABP End
10:00:00	SBP	4.35294	0.897059	128	End	SBP End
11:00:00	ABP	4.30882	1.08824	131	End	ABP End
11:00:00	SBP	4.94118	1.08824	128	End	SBP End
12:00:00	ABP	4.79412	0.897059	131	End	ABP End
12:00:00	SBP	5.19118	0.941176	128	End	SBP End
13:00:00	ABP	4.73529	1.08824	131	End	ABP End
13:00:00	SBP	5.26471	1.14706	128	End	SBP End
14:00:00	ABP	4.88235	1.22059	131	End	ABP End
14:00:00	SBP	4.98529	1.36765	128	End	SBP End
15:00:00	ABP	5.33824	1.05882	131	End	ABP End
15:00:00	SBP	5.14706	1.13235	128	End	SBP End
16:00:00	ABP	7.32353	0.955882	131	End	ABP End
16:00:00	SBP	6.92647	1.35294	128	End	SBP End
17:00:00	ABP	8.88235	0.985075	131	End	ABP End
17:00:00	SBP	8.76471	1.19118	128	End	SBP End
18:00:00	ABP	9.33333	0.651515	131	End	ABP End
18:00:00	SBP	9.16418	0.80597	128	End	SBP End
19:00:00	ABP	10.2985	0.880597	131	End	ABP End
19:00:00	SBP	9.66667	0.924242	128	End	SBP End
20:00:00	ABP	10.3676	0.897059	131	End	ABP End
20:00:00	SBP	10.4412	0.985294	128	End	SBP End
21:00:00	ABP	11.3971	0.676471	131	End	ABP End
21:00:00	SBP	11	0.823529	128	End	SBP End
22:00:00	ABP	12.2206	0.823529	131	End	ABP End
22:00:00	SBP	12.1194	1	128	End	SBP End
23:00:00	ABP	12.9062	0.8125	131	End	ABP End
23:00:00	SBP	12.6418	0.985075	128	End	SBP End
